# Supplementary material for: Gender differences in reporting workplace violence: a qualitative analysis of administrative records of violent episodes experienced by healthcare workers in a large public Italian hospital
Source: PubMed Central journal article supplement — BMJ Open. 2019 Nov 10;9(11):e031546. doi: 10.1136/bmjopen-2019-031546 (PMC6858178; doi:10.1136/bmjopen-2019-031546), 2019-11-10
Supplement: bmjopen-2019-031546.draft_revisions.pdf [file bmjopen-2019-031546.draft_revisions.pdf]

# BMJ Open

BMJ Open is committed to open peer review. As part of this commitment we make the peer review history of every article we publish publicly available.

When an article is published we post the peer reviewers' comments and the authors' responses online. We also post the versions of the paper that were used during peer review. These are the versions that the peer review comments apply to.

The versions of the paper that follow are the versions that were submitted during the peer review process. They are not the versions of record or the final published versions. They should not be cited or distributed as the published version of this manuscript.

BMJ Open is an open access journal and the full, final, typeset and author-corrected version of record of the manuscript is available on our site with no access controls, subscription charges or pay-per-view fees (<http://bmjopen.bmj.com>).

If you have any questions on BMJ Open's open peer review process please email [info.bmjopen@bmj.com](mailto:info.bmjopen@bmj.com)

# BMJ Open

## A qualitative analysis of administrative records of violent episodes experienced by healthcare workers working in a large public Italian hospital

|                               |                                                                                                                                                                                                                                                                                                                                                                                                                                                                      |
|-------------------------------|----------------------------------------------------------------------------------------------------------------------------------------------------------------------------------------------------------------------------------------------------------------------------------------------------------------------------------------------------------------------------------------------------------------------------------------------------------------------|
| Journal:                      | <i>BMJ Open</i>                                                                                                                                                                                                                                                                                                                                                                                                                                                      |
| Manuscript ID                 | bmjopen-2019-031546                                                                                                                                                                                                                                                                                                                                                                                                                                                  |
| Article Type:                 | Research                                                                                                                                                                                                                                                                                                                                                                                                                                                             |
| Date Submitted by the Author: | 10-May-2019                                                                                                                                                                                                                                                                                                                                                                                                                                                          |
| Complete List of Authors:     | Acquadro Maran, Daniela; University of Turin, Department of Psychology<br>Cortese, Claudio Giovanni; University of Turin, Department of Psychology<br>Pierluigi , Pierluigi ; Azienda Ospedaliero Universitaria Città della Salute e della Scienza di Torino<br>Fornero, Giulio ; Azienda Ospedaliero Universitaria Città della Salute e della Scienza di Torino<br>Gianino, Maria Michela; University of Turin, Department of Public Health Sciences and Pediatrics |
| Keywords:                     | Human resource management < HEALTH SERVICES ADMINISTRATION & MANAGEMENT, healthcare workers, workplace violence, qualitative analysis, gender difference, Health & safety < HEALTH SERVICES ADMINISTRATION & MANAGEMENT                                                                                                                                                                                                                                              |
|                               |                                                                                                                                                                                                                                                                                                                                                                                                                                                                      |

SCHOLARONE™  
Manuscripts

1  
2  
3 **A qualitative analysis of administrative records of violent episodes experienced by**  
4  
5 **healthcare workers working in a large public Italian hospital**  
6

7 ACQUADRO MARAN Daniela<sup>1</sup>, CORTESE Claudio Giovanni<sup>1</sup>, PAVANELLI Pierluigi<sup>2</sup>,

8  
9 FORNERO Giulio<sup>2</sup>, GIANINO Maria Michela<sup>3</sup>  
10  
11  
12  
13

14  
15 <sup>1</sup> Department of Psychology, University of Turin, Turin, Italy

16  
17 <sup>2</sup> AOU Città della salute e della Scienza Teaching Hospital, Turin, Italy

18  
19 <sup>3</sup> Department of Public Health Sciences and Pediatrics, University of Turin, Italy  
20  
21  
22

23  
24 *Corresponding author (c. a.):* Claudio Giovanni CORTESE, Phd, Full Professor, Department  
25 of Psychology, University of Turin, Via Verdi 10, Turin, Italy. E-mail:

26  
27 claudio.cortese@unito.it, phone +39 011. 6702040  
28  
29  
30  
31

32  
33 - Daniela ACQUADRO MARAN, Phd, Assistant Professor, Department of Psychology,  
34 University of Turin, Turin, Italy. E-mail: daniela.acquadro@unito.it  
35  
36

37 - Claudio Giovanni CORTESE, Phd, Full Professor, Department of Psychology, University of  
38 Turin, Turin, Italy. E-mail: claudio.cortese@unito.it  
39  
40

41  
42 - Pierluigi PAVANELLI, MD, Director, Security and Environment Unit (S.P.P.), AOU Città  
43 della salute e della Scienza Teaching Hospital, Turin, Italy. E-mail:  
44

45  
46 ppavanelli@cittadellasalute.to.it  
47

48  
49 - Giulio FORNERO, MD, Director, Quality and Safety of Care Paths Department, AOU Città  
50 della salute e della Scienza Teaching Hospital, Turin, Italy. E-mail:  
51

52  
53 gfornero@cittadellasalute.to.it  
54  
55  
56  
57  
58  
59  
60

1  
2  
3 - Maria Michela GIANINO, Associate Professor, Department of Public Health Sciences and  
4  
5 Pediatrics, University of Turin, Turin, Italy. E-mail: mariola.gianino@unito.it  
6  
7

8  
9 Word count: 4,349  
10  
11  
12  
13  
14  
15  
16  
17  
18  
19  
20  
21  
22  
23  
24  
25  
26  
27  
28  
29  
30  
31  
32  
33  
34  
35  
36  
37  
38  
39  
40  
41  
42  
43  
44  
45  
46  
47  
48  
49  
50  
51  
52  
53  
54  
55  
56  
57  
58  
59  
60

For peer review only

## Gender differences in reporting workplace violence:

### A qualitative analysis of administrative records of violent episodes experienced by healthcare workers in a large public Italian hospital

#### ABSTRACT

**Objectives:** This study aims to analyse, from a descriptive and qualitative point of view, the episodes of violence experienced by healthcare workers (HCWs) in a large public Italian hospital. The qualitative analysis permits us to collect the victims' words used to describe the event and the ways in which they deal with it. A comparison between genders was performed to better understand what type of different strategies could be used to improve the prevention of workplace violence for HCWs.

**Design and Setting:** The retrospective observational study was carried out in "Città della Salute e della Scienza", a complex of four interconnected hospitals situated in the northern Italy. This study analysed aggression data from the four-year period of 2015-2018 that included all HCWs categories. The data were obtained from the Aggression Reporting Form.

**Participants:** The analysed records were filled by 396 HCWs (3.6% of all HCWs in the hospital).

**Results:** Male HCWs aged < 30 years did not report violent episodes that occurred in the workplace, while male HCWs with 6-15 years of work experience reported more violent episodes than their female counterparts. Among the professions, nurse was the profession in which HCWs were more prone to experience a violent episode, while male medical doctors were more prone to report violent episodes than female medical doctors. Moreover, female HCWs experienced more verbal violence (insulting) than male HCWs, while male HCWs experienced more physical violence (bodily contact) than female HCWs.

1  
2  
3 **Conclusions:** The findings from this explorative study suggest that there is a gender  
4 difference in the characteristics of workplace violence perpetrated by patients, patients'  
5 relatives and visitors and in the way in which these episodes are described. Consequently, it is  
6 important in informative and preventive courses to consider gender differences in  
7 experiencing a violent episode.  
8  
9

#### 10 **Strengths and limitations of this study**

11 (+) A qualitative analysis was used to collect the victims' description of workplace violence.

12 (+) The method permits to capture respondents' points of view.

13 (+) The comparison between genders could be useful to improve the prevention in this  
14 population.

15 (-) It was not possible to overcome the bias in reporting violence.

16 (-) Unreported incidents could not be included in the study.

17 **Keywords:** human resources management; health & safety; healthcare workers; workplace  
18 violence; qualitative analysis; gender difference.  
19  
20  
21  
22  
23  
24  
25

#### 26 **INTRODUCTION**

27 Workplace violence has been defined by the World Health Organization as “the intentional  
28 use of power, threatened or actual, against another person or against a group, in work-related  
29 circumstances, that either results in or has a high degree of likelihood of resulting in injury,  
30 death, psychological harm, maldevelopment, or deprivation”[1].  
31  
32  
33  
34  
35  
36  
37  
38

39 As underlined by several investigations[2-4], the healthcare sector is at particular risk  
40 of workplace violence. Elliot[5] estimated that the risk of violence from patients and their  
41 relatives towards healthcare workers is 16 times higher than that towards other workers. This  
42 risk is highest for healthcare workers (HCWs) working in psychiatric and emergency  
43 rooms[6-7] since they report more violent events than other professionals, such as those  
44  
45  
46  
47  
48  
49  
50  
51  
52  
53  
54  
55  
56  
57  
58  
59  
60

1  
2  
3 working in wards[8-10]. Moreover, the risk of aggression is highest for those HCWs working  
4  
5 as nurses since they report more violent episodes than physicians and administrative staff[11].  
6  
7 A possible explanation for this finding is linked with the nature of their job, as nurses have  
8  
9 direct contact with patients (who could be confused, frightened, delirious or under the  
10  
11 influence of drugs) and their families/relative[12-14].  
12  
13  
14

15 Another explanation is linked to gender: in some countries, such as Italy, in more than  
16  
17 70% of cases, nurses are female[15], and some studies have shown that female workers are  
18  
19 more often affected by violence than their male colleagues[16-17]. Gender is also related to  
20  
21 the type of violence experienced by HCWs; the investigation by[10] showed that, in hospitals,  
22  
23 female nurses experienced verbal violence (such as yelling and screaming) more often, while  
24  
25 male nurses were more often victims of physical assault (such as hitting and kicking). These  
26  
27 types of violent episodes affect their perceived wellbeing; they could lead to several  
28  
29 consequences, such as the interruption of work, medical treatment, and hospital and/or home  
30  
31 care, and psychological support might be needed to cope with the event[18].  
32  
33  
34  
35

36 An interesting question concerns the report by HCWs of violent episodes in the  
37  
38 workplace. Findings from investigations have shown that violence in the healthcare sector is  
39  
40 under-reported[19-20], especially verbal violence[2]. The under-reporting of violence is not a  
41  
42 phenomenon that involves only workplace violence. All forms of violence (sexual  
43  
44 harassment, domestic violence, school bullying, and so on) are under-reported due to different  
45  
46 reasons, including the stigma of victimization, such as shame, isolation, fear, or threat of  
47  
48 further violence, which often deter victims from reporting violent episodes[21].  
49  
50  
51

52 Moreover, for HCWs, there is the risk of desensitization to violence, as violence – due  
53  
54 to contact with frail and ill people – is perceived as part of HCWs' job[22]. Nevertheless, the  
55  
56 reporting of any act of violence is fundamental in engaging hospital management to activate  
57  
58 appropriate organizational responses. Indeed, the administrative records of violent episodes  
59  
60

1  
2  
3 experienced by HCWs constitute an important source of information[23] about the type of  
4 violence (physical or verbal), the type of perpetrator (patient, relative, or visitor), the type of  
5 HCW (administrator, midwife, nurse, or physician), the place in which the HCW experienced  
6 the violence (psychiatry, emergency, or ward) and the type of activity that she/he was doing  
7 (support activity for patients, professional team's back-office activity, or assistance and  
8 patient care). These records permit the prevention of workplace violence, providing  
9 information about, for example, the type of training course that a particular HCW sub-  
10 population needs and/or the safety device to be installed in a particular ward.  
11  
12  
13  
14  
15  
16  
17  
18  
19  
20

21 In Italy, the violent behaviours reported by HWCs in 2018 total 1200. In most cases  
22 (70%), the victim is female, and the perpetrator is a patient, a patient's relative or a  
23 visitor[24]. To deal with this phenomenon, in 2007, the Italian Ministry of Health published  
24 Recommendation n. 8, "Preventing acts of violence against health workers". This  
25 recommendation had several goals. First, it foresees the reporting of incidents of violence  
26 using official sources, such as the judicial authority, the police forces and the National  
27 Workplace Accident Institute. Second, it promotes the collection of data through specific  
28 surveys to identify the frequency and severity of violent episodes. The results could be useful  
29 for adopting appropriate action, from an organizational and structural point of view, for  
30 example, redesigning the space and/or reformulating procedures for access to the ward.  
31 Moreover, data could be used to improve the training course that aims to prevent violence, to  
32 improve the coping strategy and to reduce the negative consequences[25].  
33  
34  
35  
36  
37  
38  
39  
40  
41  
42  
43  
44  
45  
46  
47  
48

49 This study aims to analyse, from a descriptive and qualitative point of view, the  
50 episodes of violence experienced by HCWs working in a large public Italian hospital. The  
51 qualitative analysis permits us to collect the victims' words used to describe the event and the  
52 ways in which to deal with it[26]. The advantage offered by this method is that it allows us to  
53 capture respondents' points of view without predetermining their answers[27-28]. This  
54  
55  
56  
57  
58  
59  
60



1  
2  
3 approach is widely used in social science research[29] and has been used to investigate  
4  
5 HCWs' perceptions of physical and verbal aggression[30-32]. A comparison between genders  
6  
7 was used to better understand what type of differences, if any, could be used to improve the  
8  
9 prevention of workplace violence for HCWs. Based on the literature analysis presented above,  
10  
11 the hypothesis is that there are gender differences in the violent episodes experienced by  
12  
13 female and male HCWs: female HCWs experience more verbal violence than their male  
14  
15 colleagues, and male HCWs experience more physical violence than their female colleagues.  
16  
17 Moreover, from the analysis of the episodes, as described by female and male HCWs, we  
18  
19 expected that the emerged semantic differences characterized the experience of victimization.  
20  
21 This is the novelty aspect of this work. Therefore, we do not have specific hypotheses about  
22  
23 the relationship between gender and the lexical words used to define the violent episodes. We  
24  
25 thus intended to analyse this from an explorative perspective.  
26  
27  
28  
29

## 30 **METHOD**

31  
32 The retrospective observational study was carried out in Città della Salute e della Scienza  
33  
34 (City of Health and Science University Hub), a complex of four interconnected hospitals  
35  
36 situated in the northern Italy. It has 1917 ordinary hospital beds and more than 400 day  
37  
38 hospital and day surgery beds, and it is one of largest national and European health hubs,  
39  
40 boasting approximately twelve thousand employees. This study analysed aggression data  
41  
42 from the four-year period of 2015-2018 that included all worker categories. The data were  
43  
44 obtained from the Aggression Reporting Form, adopted in 2014 in compliance with the  
45  
46 abovementioned recommendation of the Ministry of Health. The form is available on the  
47  
48 intranet portal and must be completed in all its parts by victims of assault within 72 hours of  
49  
50 the event and sent to the Safety and Environment Office. Each administrative record of a  
51  
52 violent episode contains the following information: the sociodemographic data of the victim  
53  
54 (age, gender, years of experience, and profession), workplace in which the violent episode  
55  
56  
57  
58  
59  
60

1  
2  
3 occurred (psychiatry, emergency room or ward - 1 item), the type of activity performed by the  
4  
5 HCW at the moment of aggression (i.e., conversation), the HCW's shift at the time of  
6  
7 aggression, the type of aggressor (the perpetrator could be more than one person: patient,  
8  
9 patient's relative, or visitor – 3 items, yes/no answer), the misconduct (violent behaviour  
10  
11 could be of more than one type: insult, threat, bodily contact, drop of object, or use of weapon  
12  
13 – 5 items, yes/no answer), the consequences (consequences could be of more than one type:  
14  
15 interruption of work, medical treatment, psychological support, hospital care, home care, or  
16  
17 no consequence – 5 items, yes/no answer), the possibility of preventing the attack (1 item,  
18  
19 yes/no answer), and the description of the event. Similar to other investigations (see[10]), age  
20  
21 was categorized as <30 years, 30-39 years, 40-49 years, and >=50 years, and the years of  
22  
23 experience were classified as <=5 years, 6-15 years, 16-25 years, and >25 years (1 item each).  
24  
25 The type of activity was categorized as support activity for patients (e.g., meal preparation  
26  
27 and administration), the professional team's back-office activity (e.g., treatment prescriptions),  
28  
29 and assistance and patient care (e.g., assistance at the front desk)[33] (1 item). The profession  
30  
31 was categorized as midwife, nurse, medical doctor, administrative staff or technician (such as  
32  
33 a radiologist) (1 item). The work shift in which the aggression occurred was categorized as  
34  
35 morning (6:00-12:00), afternoon (12:00-18:00), evening (18:00-24:00) and night (0:00-6:00)  
36  
37 (1 item).  
38  
39  
40  
41  
42  
43  
44

## 45 Procedure

46  
47 Data were analysed by the authors of this paper and by assistants trained by researchers. After  
48  
49 the approval of the Local Ethics Committee (Prot. 19468 January 17, 2019), the  
50  
51 administrative records of violent episodes were consulted in January-February 2019. Records  
52  
53 were transcribed in a database; sensitive data were omitted. This procedure was in accordance  
54  
55 with the code of ethics of the Italian Association of Professional Psychologists and with  
56  
57 Italian law concerning privacy. The files that constituted the corpus of administrative records  
58  
59  
60

1  
2  
3 were saved in a folder. Overall, the sample contained 408 records. The inclusion criteria for  
4 the episodes in this analysis were the record describing the case of violence perpetrated by a  
5 patient, a relative or a visitor. Thus, 14 records were excluded because the perpetrator was a  
6 colleague, a subordinate or a supervisor. Moreover, eight records were excluded because the  
7 gender of the victim was omitted. Therefore, 396 records were included in the present work.  
8  
9  
10  
11  
12  
13

### 14 **Data analysis**

15  
16 Descriptive statistics were calculated using IBM SPSS Statistics, version 24. Descriptive  
17 measures (mean  $\pm$  SD) were calculated for all the continuous variables. Because of the  
18 categorical nature of the data,  $\chi^2$  tests were used to examine gender differences, followed by  
19 effect-size calculations (Phi and Cramer's V) to estimate the practical significance of the  
20 differences. As a post hoc test, standardized Pearson residuals (SPRs) were calculated for  
21 each cell to determine which cell differences contributed to the  $\chi^2$  test results. SPRs with  
22 absolute values greater than 1.96 indicated that the number of cases in that cell was  
23 significantly larger than would be expected (in terms of over- or underrepresentation) if the  
24 null hypothesis was true, with a significance level of .05[34].  
25  
26  
27  
28  
29  
30  
31  
32  
33  
34  
35  
36

37 As suggested by[35], content analysis was used to process the written description of  
38 the violent episodes. Content analysis is defined as “the systematic assignment of  
39 communication content to categories according to rules, and the analysis of relationships  
40 involving those categories using statistical methods”[36, p. 3]. These data were analysed  
41 using *Alceste 6.0*[37]. This software permits the analysis of written data according to a  
42 descending hierarchical classification (DHC) in which the text is divided into elementary  
43 context units (E.C.U.) and categorized into homogeneous classes. The software allows for the  
44 isolation and separation of internally homogeneous groups (or classes) within specific  
45 populations. Classes are formed on the basis of the co-occurrence of forms and units of  
46 context[35]. The software uses symbols to indicate the type of root. If the word is followed by  
47  
48  
49  
50  
51  
52  
53  
54  
55  
56  
57  
58  
59  
60

1  
2  
3 the symbol <, this indicates that only the root of the word is recognized (e.g., aggressi<  
4 denotes the words aggressive, aggression, and aggressively). The symbol + indicates the  
5 identification of the termination and of different forms with the same root (e.g., nurse+  
6 indicates the words nurse and nurses). The first class that is formed will be the most  
7 homogeneous in terms of content, i.e., the one whose lexical universe appears to differ from  
8 those of others. The software performs the  $\chi^2$  test on the association between words and  
9 classes to identify the specific vocabulary for each class. This step allows the researcher to  
10 identify the lexical worlds in the text, i.e., the “usual places” (*topoi*) of discourse[38]. The  
11 software allows for repeated segments to be highlighted, i.e., associations of the most frequent  
12 words in a class and related classes with the selected variables. These are called illustrative  
13 variables and carry further information about the textual corpus, allowing the researcher to  
14 identify the specific characteristics that define individuals who share the same semantic  
15 universe.

16  
17 In this study, the findings from the descriptive analysis were used as illustrative  
18 variables for the text analysis. An example of an illustrative variable is \*midwife, which  
19 indicates the profession of the HCW that draws up the administrative record to report the  
20 violence experienced in the workplace. The resulting data were examined by three  
21 independent and autonomous subjects, as suggested by[39]. This phase was followed by a  
22 discussion of the meaning attributed to the data to reach an agreement on the results.  
23 Consistency was guaranteed by reproducibility (or intercoder reliability -[40]; Cohen’s  $k =$   
24 .85).

### 25 **Patient and public involvement**

26 No patient involved.

## RESULTS

### Descriptive analysis

Overall, the records were compiled by 396 HCWs (3.6% of all HCWs working in the hospital). A total of 302 HCWs (76.3%) were female, representing approximately 4% of the entire female HCW population; 94 (23.7%) were male, representing 3.1% of the entire male HCW population. Most of the HCWs aged 40-49 years (146, 36.9%; 4.7% of the entire HCW population aged 40-49 years). Regarding years of experience, most HCWs were in the range of 6-15 years (181, 46.3%; 6.1% of the entire HCW population with 6-15 years of experience). Two hundred ninety-eight HCWs (76.2%) were nurses (26.6% of the entire nurse population), 53 (13.6%) were midwives (25.4% of the entire midwife population), 22 (5.6%) were medical doctors (1.2% of the entire medical doctor population), 15 (3.8%) were administrative staff (1.7% of the entire administrative staff population) and 3 (0.8%) were technicians (0.5% of the entire technician population). Table 1 presents the sociodemographic characteristics of the female and male HCWs that experienced violence.

Regarding the age of victims, the findings showed a statistically significant difference between genders (Cramer's  $V = 0.16$ ). In particular, there were no male victims aged <30 years ( $|SPR| = -2.0$ ). Male HCWs with 6-15 years of experience referred more frequently to episodes of violence ( $|SPR| = 1.7$ , Cramer's  $V = 0.16$ ) than female HCWs. Moreover, male medical doctors referred more frequently to episodes of violence than female doctors, and these episodes of violence occurred more frequently for male medical doctors ( $|SPR| = 2.5$ , Cramer's  $V = 0.18$ ). For female HCWs, more than male HCWs, the perpetrator was a patient's relative, while for male HCWs, more than female HCWs, the perpetrator was a visitor. Regarding consequences, home care was indicated by male HCWs, while female HCWs did not mention it.

Table 1. Sociodemographic characteristics of the female and male HCWs that experienced violence. The percentages (N = 396) are in brackets.

|                                            | Female<br><i>n</i> = 302 | Male<br><i>n</i> = 94 | $\chi^2$ | <i>p</i> |
|--------------------------------------------|--------------------------|-----------------------|----------|----------|
| Age:                                       |                          |                       | 9.45     | .024     |
| - <30 years                                | 17(5.7)                  | -                     |          |          |
| - 30-39 years                              | 83(27.9)                 | 18(19.4)              |          |          |
| - 40-49 years                              | 105(35.4)                | 41(44.1)              |          |          |
| - $\geq$ 50 years                          | 92(31)                   | 34(36.6)              |          |          |
| Years of experience:                       |                          |                       | 10.24    | .017     |
| - $\leq$ 5                                 | 44(14.8)                 | 6(6.5)                |          |          |
| - 6-15                                     | 128(43)                  | 53(57)                |          |          |
| - 16-25                                    | 80(26.8)                 | 27(29)                |          |          |
| - $>$ 25                                   | 46(15.4)                 | 7(7.5)                |          |          |
| Profession:                                |                          |                       | 13.11    | .011     |
| - Midwife                                  | 39(13.1)                 | 14(15.1)              |          |          |
| - Nurse                                    | 236(79.2)                | 62(66.7)              |          |          |
| - Medical doctor                           | 11(3.7)                  | 11(11.8)              |          |          |
| - Administrative staff                     | 9(3)                     | 6(6.5)                |          |          |
| - Technician                               | 3(1)                     | -                     |          |          |
| Workplace:                                 |                          |                       | 4.38     | n.s.     |
| - Psychiatry                               | 35(38.5)                 | 84(28.3)              |          |          |
| - Emergency room                           | 104(35)                  | 23(25.3)              |          |          |
| - Ward                                     | 109(36.7)                | 33(36.3)              |          |          |
| Type of activity:                          |                          |                       | 3.61     | n.s.     |
| - Support activity for patient             | 125(45.8)                | 40(48.8)              |          |          |
| - Professional team's back-office activity | 77(28.2)                 | 15(18.3)              |          |          |
| - Assistance and patient care              | 71(26)                   | 27(32.9)              |          |          |
| Work shift:                                |                          |                       | 0.55     | n.s.     |
| - Morning                                  | 85(28.5)                 | 30(32.3)              |          |          |
| - Afternoon                                | 124(41.6)                | 36(38.7)              |          |          |
| - Evening                                  | 64(21.5)                 | 20(21.5)              |          |          |
| - Night                                    | 25(8.4)                  | 7(7.5)                |          |          |
| Perpetrator:                               |                          |                       |          |          |
| - Patient                                  | 173(57.3)                | 56(59.6)              | 0.15     | n.s.     |
| - Patient's relative                       | 157(52)                  | 35(37.2)              | 6.25     | .012     |
| - Visitor                                  | 4(1.3)                   | 5(5.3)                | 5.15     | .023     |
| Misconduct:                                |                          |                       |          |          |
| - Insult                                   | 252(83.4)                | 67(71.3)              | 6.78     | .009     |
| - Threat                                   | 141(46.7)                | 42(44.7)              | 0.12     | n.s.     |
| - Bodily contact                           | 77(25.5)                 | 37(39.4)              | 6.72     | .010     |
| - Throwing objects                         | 42(13.9)                 | 20(21.3)              | 2.95     | n.s.     |
| - Use of weapon                            | 14(4.6)                  | 5(5.3)                | 0.07     | n.s.     |
| Consequences:                              |                          |                       |          |          |
| - Interruption of work                     | 61(64.9)                 | 210(69.8)             | 0.79     | n.s.     |
| - Medical treatment                        | 29(9.6)                  | 14(15.1)              | 2.15     | n.s.     |
| - Psychological support                    | 16(5.3)                  | 6(6.4)                | 0.16     | n.s.     |
| - Hospital care                            | 2(0.7)                   | 1(1.1)                | 0.15     | n.s.     |
| - Home care                                | -                        | 2(2.2)                | 6.53     | .011     |
| - No consequences                          | 64(21.3)                 | 26(28)                | 1.76     | n.s.     |
| The attack could be prevented              | 104(40)                  | 25(29.4)              | 3.07     | n.s.     |

Note. n.s. = not statistically significant.

### Text analysis

Based on findings from the descriptive analysis, age, years of experience and profession were used as illustrative variables. The analysis of the administrative record drawn up by female HCWs showed that the corpus was composed of 14,951 occurrences, 2,739 distinct forms (mean frequency = 13 per form) and 1,345 *hapax*, i.e., words used only once. The overall number of E.C.U. was 516. The five most frequent words (associated forms) in the corpus were *patient+* (n = 329), *aggressi<* (n = 125), *medic<* (n = 62), *wait<* (n = 61), and *staff* (n = 39). The dendrogram of stable classes (Figure 1) shows the classification procedure used to create the two classes that emerged (amount of variance explained = 96.9%). For each class, the first characterizing five words are presented in order of the Chi-squared results (Table 2), together with the associated illustrative variables.

INSERT FIGURE 1 ABOUT HERE

Table 2. Findings from text corpus of administrative records compiled by female HCW victims of workplace violence.

| Class I                                       |          | Class II                                     |          |
|-----------------------------------------------|----------|----------------------------------------------|----------|
| <i>Words</i>                                  | $\chi^2$ | <i>Words</i>                                 | $\chi^2$ |
| Visit<                                        | 20       | Kick+                                        | 88       |
| Wait<                                         | 17       | Agitat<                                      | 76       |
| Therap+                                       | 13       | Cris+                                        | 69       |
| Work<                                         | 12       | Personal+                                    | 63       |
| Triage                                        | 11       | Object+                                      | 56       |
| Illustrative variables: emergency room, ward. |          | Illustrative variables: psychiatry, midwife. |          |

1  
2  
3 Class I explained 75% of the variance and was labelled *Waiting time*. The most  
4 representative words in terms of  $\chi^2$  describe the violent episodes as a consequence of patients  
5 and relatives waiting for a visit or therapy or of an assignment of the degrees of urgency to  
6 wounds or illnesses to decide the order of treatment of a patient. This waiting time was  
7 considered by the perpetrator as unacceptable. The following sentence is an example of how a  
8 female HCW described the violent episode.  
9  
10  
11  
12  
13  
14  
15

16  
17 *“The patient’s relatives were complaining about the waiting time. They could tell that the staff*  
18 *are unable to work. The patient’s son and daughter repeatedly came into the emergency room*  
19 *instead of waiting in the hall. The patient’s son said to not annoy him because otherwise there*  
20 *would be trouble”* (nurse, aged 30-39 years, 6-15 years of work)  
21  
22  
23  
24

25 Class II explained 25% of the variance and was labelled *Physical attack*. The lexical  
26 world refers to the behaviours demonstrated by psychiatric patients during routine activities,  
27 such as the distribution of meals. Perpetrators were described as patients who suffered from a  
28 psychotic crisis and who physically assaulted an HCW. In the sentence below, there is an  
29 example of a respondent’s textual production.  
30  
31  
32  
33  
34  
35

36  
37 *“At the end of the dinner, the patient had a crisis; he became aggressive with staff that was*  
38 *around him and kicked me in the face, cutting my upper lip”* (midwife, aged 30-39 years, 6-15  
39 years of experience)  
40  
41  
42

43 The analysis of the administrative record drawn up by male HCWs showed that the  
44 corpus was composed of 3,804 occurrences, 1,271 distinct forms (mean frequency = 9 per  
45 form) and 795 *hapax*, i.e., words used only once. The overall number of E.C.U. was 144. The  
46 five most frequent words (associated forms) in the corpus were *patient+* (n = 103), *aggressi<*  
47 (n = 34), *threat+* (n = 29), *person<* (n = 26), and *medic<* (n = 20). The dendrogram of stable  
48 classes (Figure 2) shows the classification procedure used to create the five classes that  
49 emerged (amount of variance explained = 93.6%). For each class, the first characterizing five  
50  
51  
52  
53  
54  
55  
56  
57  
58  
59  
60



1  
2  
3 words are presented in order of the Chi-squared results (Table 3), together with the associated  
4  
5 illustrative variables.  
6  
7

8  
9  
10  
11  
12  
13  
14  
15  
16  
17  
18  
19  
20  
21  
22  
23  
24  
25  
26  
27  
28  
29  
30  
31  
32  
33  
34  
35  
36  
37  
38  
39  
40  
41  
42  
43  
44  
45  
46  
47  
48  
49  
50  
51  
52  
53  
54  
55  
56  
57  
58  
59  
60

INSERT FIGURE 2 ABOUT HERE

The dendrogram shows that Classes I, II and III are more similar than Classes IV and V. At the same time, Classes IV and V are more similar than the other classes. Classes I, II and III explain – together – 65% of the variance; Classes IV and V explain 35% of the variance.

Classes I, II and III were labelled *Verbal violence*. The words characterizing these classes were related to violent behaviours – such as insulting and threatening – which HCWs experienced principally in the emergency room and ward, both through direct contact (face to face) and by phone. In these episodes, one or more colleagues were involved. Below are some examples from the descriptions of violent events made by male HCWs:

*“Before the conclusion of the visit, the father started to attack me verbally. He told me ‘I pay the taxes, I ask you to do everything, I do not go out until the child has a diagnosis’. After reiterating that it is not possible to perform this exam in an emergency room, the father threatened me and the nurse verbally, repeatedly”* (medical doctor, aged 40-49 years, 6-15 years of experience)

*“I phoned the patient’s son to inform him of the imminent discharge of his father. I was insulted with elevated tone repeatedly. It was impossible to manage communication; I did not reply in any way to the insults”* (nurse, 6-15 years of experience)

*“The patient’s husband accused me and my colleague of not respecting the numbering in the call for assistance. The colleague explained to him that there is a work plan, but he verbally attacked us”* (nurse, aged  $\geq 50$  years, 16-25 years of experience)

Classes IV and V were labelled *Corporeal assault*. The words characterizing these classes were related to physical violent behaviours – such as hitting and throwing objects –

which HCWs experienced principally in psychiatry. Below are some examples of sentences from administrative records:

*“While me and my colleague were preparing a medicament, we were interrupted by the noise of shots coming from the kitchen door. Then, we were reached for and assaulted by the patient”* (nurse, aged >50 years, 6-15 years of experience)

*“An agitated patient – for no apparent reason – pushed a cart against the entrance door to break through. He was shunted out, and then he came back and threatened to break our arms”* (administrative staff, aged 40-49 years, 16-25 years of experience)

Table 3. Findings from text corpus of administrative records compiled by male HCW victims of workplace violence.

| Class I                                             |          | Class II                                                                                  |          | Class III                                                   |          | Class IV                                                       |          | Class V                                      |          |
|-----------------------------------------------------|----------|-------------------------------------------------------------------------------------------|----------|-------------------------------------------------------------|----------|----------------------------------------------------------------|----------|----------------------------------------------|----------|
| <i>Words</i>                                        | $\chi^2$ | <i>Words</i>                                                                              | $\chi^2$ | <i>Words</i>                                                | $\chi^2$ | <i>Words</i>                                                   | $\chi^2$ | <i>Words</i>                                 | $\chi^2$ |
| Wait<                                               | 47       | Insult<                                                                                   | 48       | Colleague+                                                  | 12       | Launch<                                                        | 57       | Follow<                                      | 24       |
| Ask<                                                | 30       | Staff                                                                                     | 11       | Ward                                                        | 11       | Object+                                                        | 45       | Therap+                                      | 20       |
| Visit                                               | 25       | Motiv<                                                                                    | 10       | Verbal<                                                     | 11       | Kick+                                                          | 22       | Nois+                                        | 19       |
| Time                                                | 24       | Recei<                                                                                    | 9        | Patient+                                                    | 11       | Hit<                                                           | 16       | Attempt<                                     | 15       |
| Behaviour+                                          | 24       | Phon+                                                                                     | 9        | Relative+                                                   | 9        | Person<                                                        | 16       | Violen<                                      | 15       |
| Illustrative variables:<br>emergency room,<br>nurse |          | Illustrative variables:<br>emergency room,<br>professional team's<br>back-office activity |          | Illustrative variables:<br>ward, medical<br>doctor, midwife |          | Illustrative variables:<br>psychiatry,<br>administrative staff |          | Illustrative variables:<br>psychiatry, nurse |          |

## DISCUSSION

The aim of this work was to explore and analyse, from a descriptive and qualitative point of view, the episode of violence experienced by HCWs and perpetrated by patients, patients' relatives and visitors. Data were collected from the administrative records used to report

1  
2  
3 violent episodes in an Italian hospital. The findings from the descriptive analysis showed  
4  
5 some differences based on HCWs' gender. Male HCWs aged < 30 years did not report violent  
6  
7 episodes that occurred in the workplace, while male HCWs with 6-15 years of experience  
8  
9 reported more violent episodes than their female counterparts. Among the professions, nurse  
10  
11 was the profession in which HCWs were more prone to experience a violent episode,  
12  
13 confirming the results of[11]. Nevertheless, the findings showed that male medical doctors  
14  
15 were more prone to report violent episodes than female medical doctors. Confirming the  
16  
17 findings of[10], in this study, female HCWs experienced more verbal violence (insulting) than  
18  
19 male HCWs, while male HCWs experienced more physical violence (bodily contact) than  
20  
21 female HCWs. Thus, our hypothesis was confirmed. An interesting finding concerns the  
22  
23 perpetrator: female HCWs experienced a violent episode acted out by a patient's relative more  
24  
25 than male HCWs, and male HCWs experienced a violent episode acted out by a visitor more  
26  
27 than female HCWs. Regarding the workplace, type of activity, and work shift, no statistically  
28  
29 significant difference between gender emerged. This finding did not confirm the results  
30  
31 of[10], as in this study, it was not found that male HCWs experienced workplace violence in  
32  
33 wards more than female HCWs.

34  
35  
36  
37  
38  
39  
40 Text analyses showed that female and male HCWs reported violent episodes in  
41  
42 different ways. The findings from the text analysis of female HCWs identified a contextual  
43  
44 factor for the violent episodes that occurred principally in those who were working in  
45  
46 emergency rooms and wards. This contextual factor is the waiting time, a condition in which  
47  
48 a patient and a patient's relative – as suggested by[14] – could experience anxiety, confusion,  
49  
50 and fear. Moreover, female HCWs (in particular, midwives) describe the violent episodes that  
51  
52 occurred in psychiatry as a consequence of a mental health disease and noted that the assault  
53  
54 was unpredictable. Thus, it seems that female HCWs perceive dealing with violence as part of  
55  
56 their role[41]. Male HCWs use different words to describe the violent episodes. They, more  
57  
58  
59  
60

1  
2  
3 often than female HCWs, described the episodes including the witness of the episode, namely,  
4 colleagues. In the same way as female HCWs, male HCWs described episodes that occurred  
5 in the emergency room and ward (verbal violence) and in psychiatry (corporeal assault).  
6  
7 Those episodes were related more to the type of profession than to the gender of the HCWs.  
8  
9 Regarding the other illustrative variables (age and years of experience), they did not have an  
10 effect on the differences in experiencing violent episodes between male and female HCWs.  
11  
12

13  
14  
15  
16  
17 This study has strengths and limitations. Regarding strengths, in this study,  
18 administrative records in which HCWs experienced violent episodes were used. Usually, self-  
19 administered questionnaires are utilized to collect data about workplace violence. Self-  
20 assessment could have been affected by recall bias[42]; thus, this method does not solve the  
21 problem of overreporting or underreporting: the long study period could influence the  
22 memory. The analysis of reports within 72 hours of the aggression permits the retrieval of  
23 important information about the episode. Moreover, in this study, a qualitative analysis was  
24 used to identify differences between genders in reporting these episodes. According to[43],  
25 the majority of studies in work and health psychology and investigations on workplace  
26 violence utilized a quantitative approach: this choice stems from the fact that this method  
27 allows large numbers of subjects to complete standardized questionnaires. Otherwise, a  
28 qualitative approach permits the gathering of the complexity and nuances of individual  
29 experiences and reveals the range of ways in which common features operate in the  
30 experiences of workplace violence[44]. Indeed, this method was useful to better understand  
31 the lexicon that characterized the victimization experienced by female and male HCWs.  
32  
33  
34  
35  
36  
37  
38  
39  
40  
41  
42  
43  
44  
45  
46  
47  
48  
49

50  
51 This study also has weaknesses. First, because HCWs decided to report or not the  
52 violent episodes, the results cannot be generalized and should be taken with caution. Thus, it  
53 was not possible to overcome the bias in reporting violence, and HCWs may be more likely to  
54 report serious events and exclude less serious ones[45]. Future research should explore, in a  
55  
56  
57  
58  
59  
60

1  
2  
3 more comprehensive way, this phenomenon within the health organization. For example,  
4 interviews and focus group discussion techniques could be used to better understand the  
5  
6 obtained results and how to promote the reporting of all violent behaviour, not only the most  
7  
8 serious events. A better comprehension of the phenomenon could be useful to prevent it, as  
9  
10 recommended by the Italian Ministry of Health. Another limitation is in the procedure  
11  
12 adopted: administrative records had different styles of reports, which we tried to make  
13  
14 homogeneous through a classification procedure. Otherwise, this process included a  
15  
16 subjective component, which must be contemplated in every narrative analysis[46]. The use  
17  
18 of a mixed-method technique could permit the description of the phenomenon by a  
19  
20 quantitative and qualitative approach. Future research could use this technique to expand the  
21  
22 scope and improve the analytic power of studies on workplace violence in the healthcare  
23  
24 sector[47].  
25  
26  
27  
28  
29

## 30 **CONCLUSIONS**

31  
32 Overall, the findings from this explorative study suggest that there is a gender difference not  
33  
34 only in the characteristics of workplace violence perpetrated by patients, patients' relatives  
35  
36 and visitors but also in the way in which these episodes are described. Consequently, it is  
37  
38 important in informative and preventive courses to consider gender differences in  
39  
40 experiencing a violent episode. For female HCWs, it could be useful to provide clear  
41  
42 messages that the acceptance of such violence is not "part of the job"[48], explaining that  
43  
44 anger should not be taken as a common emotion in the healthcare environment and that  
45  
46 exposure to verbal violence should not be accepted as a hazard of the profession[49]. For  
47  
48 male HCWs, it could be useful to reflect on feelings related to the stigma of victimization and  
49  
50 to stress that a witness is not necessary to corroborate their version of the event. This finding  
51  
52 could be analysed more in depth through an investigation that involves witnesses of the  
53  
54 violent episodes describing the episodes from their points of view. Moreover, these findings  
55  
56  
57  
58  
59  
60

1  
2  
3 could be utilized by health organization management to better organize the security  
4  
5 arrangements in some departments, to manage the overload of the emergency room and to  
6  
7 increase the use of safety devices.  
8  
9

10 In conclusion, the findings could be used by health organization management to  
11  
12 improve individual measures, such as intervention programmes, counselling, and  
13  
14 psychological help, to reflect on victimization experiences and the way in which female and  
15  
16 male HCWs react to and cope with workplace violence.  
17  
18  
19  
20

21 **Acknowledgements.** The authors thank Ms. Daniela Cosentino and Mr. Andrea Caputo (M.S.  
22  
23 in Psychology) for their assistance in the transcription of the administrative records.  
24  
25

26 **Competing interests statement.** We declare that we have no significant competing financial,  
27  
28 professional, or personal interests that might have influenced the performance or presentation  
29  
30 of the work described in this manuscript.  
31  
32

33 **Funding statement.** This research received no specific grant from any funding agency in the  
34  
35 public, commercial or not-for-profit sectors.  
36  
37

38 **Ethic approval.** The Local Ethics Committee approved the research project in January 17,  
39  
40 2019 (Prot. 19468).  
41

42 **Author Contributions.** Conceptualization: D.A.M., C.G.C. and M.G.; methodology:  
43  
44 D.A.M.; investigation: D.A.M. and M.G.; data analysis: D.A.M.; writing (original draft  
45  
46 preparation): D.A.M. and C.G.C.; writing (review and editing): D.A.M., C.G.C. and M.G.  
47  
48  
49  
50  
51  
52  
53  
54  
55  
56  
57  
58  
59  
60

**REFERENCES**

- 1 WHO. Violence: a public health priority. Geneva: World Health Organization 1995.
- 2 Cooper CL, Swanson N. Workplace violence in the health sector. State of the art. Geneva: Organización Internacional de Trabajo, Organización Mundial de la Salud, Consejo Internacional de Enfermeras Internacional de Servicios Públicos 2002.
- 3 Phillips JP. Workplace violence against health care workers in the United States. *New England journal of medicine* 2016;374(17):1661-1669. doi:10.1056/NEJMra1501998
- 4 Sun P, Zhang X, Sun Y, Ma H, Jiao M, Xing K, Kang Z, et al. Workplace violence against health care workers in North Chinese hospitals: a cross-sectional survey. *Int. J. Environ. Res. Public Health* 2017;14(1):96. doi:10.3390/ijerph14010096
- 5 Elliott PP. Violence in healthcare. *Nurs Manage* 1997:38-41.
- 6 Grottoli E, Ciriello S, Gabriele M, Giudice A, Lilli M, Mammi F, Quaranta D, Rocchia K, Spadone F, Magnavita N. Assaults and nuisances in health care environment. *Giornale italiano di medicina del lavoro ed ergonomia* 2007;29(3):653-5.
- 7 Iozzino L, Ferrari C, Large M, Nielssen O, De Girolamo G. Prevalence and risk factors of violence by psychiatric acute inpatients: a systematic review and meta-analysis. *PloS one* 2015;10(6):e0128536. doi:10.1371/journal.pone.0128536
- 8 Arnetz JE, Hamblin L, Essenmacher L, Upfal MJ, Ager J, Luborsky M. Understanding patient-to-worker violence in hospitals: a qualitative analysis of documented incident reports. *J Adv Nurs* 2015;71(2):338-48. doi:10.1111/jan.12494
- 9 Kim SC, Ideker K, Todicheeney-Mannes D. Usefulness of aggressive behaviour risk assessment tool for prospectively identifying violent patients in medical and surgical units. *J Adv Nurs* 2012;68(2):349-57. doi: 10.1111/j.1365-2648.2011.05744.x

- 1  
2  
3 10 Magnavita N, Heponiemi T. Violence towards health care workers in a Public Health Care  
4 Facility in Italy: a repeated cross-sectional study. *BMC Health Serv*  
5 *Res* 2012;12(1):108. doi:10.1186/1472-6963-12-108  
6  
7  
8  
9  
10 11 Hahn S, Hantikainen V, Needham I, Kok G, Dassen T, Halfens RJG. Patient and visitor  
11 violence in the general hospital, occurrence, staff interventions and consequences: a  
12 cross-sectional survey. *J Adv Nurs* 2012;68(12):2685-2699.  
13  
14  
15  
16 12 Ahmad M, Al-Rimawi R, Masadeh A, Atoum M. Workplace violence by patients and their  
17 families against nurses: Literature review. *Int J Nurs Health Sci* 2015;2(4):46-55.  
18  
19  
20 21 22 13 Lawoko, S, Soares, JJ, Nolan P. Violence towards psychiatric staff: A comparison of  
23 gender, job and environmental characteristics in England and Sweden. *Work*  
24 *Stress* 2004;18(1):39-55. doi: 10.1080/02678370410001710337  
25  
26  
27 28 29 14 Schablon A, Wendeler D, Kozak A, Nienhaus A, Steinke S. Prevalence and Consequences  
30 of Aggression and Violence towards Nursing and Care Staff in Germany—A Survey.  
31 *Int J Environ Res Public Health* 2018;15(6):1274. doi:10.3390/ijerph15061274  
32  
33  
34 35 36 15 Italian Ministry of Health. Personale delle A.S.L. e degli istituti di cura  
37 pubblici.[www.salute.gov.it/imgs/C\\_17\\_pubblicazioni\\_2161\\_allegato.pdf](http://www.salute.gov.it/imgs/C_17_pubblicazioni_2161_allegato.pdf)  
38  
39  
40 41 42 16 Morganson, VJ, Brown SE. Gender and Sexualized Aggression in the Workplace. In:  
43 Nadler JY, Lowery MR, eds. *The War on Women in the United States: Beliefs,*  
44 *Tactics, and the Best Defenses.* Praeger Publishing 2018:2051.  
45  
46 47 48 17 Chen C, Smith PM, Mustard C. Gender differences in injuries attributed to workplace  
49 violence in Ontario 2002–2015. *Occup Environ Med* 2019;76(1):3-9.  
50  
51  
52  
53  
54 55 56 18 Itzhaki M, Peles-Bortz A, Kostistky H, Barnoy D, Filshinsky V, Bluvstein I. Exposure of  
57 mental health nurses to violence associated with job stress, life satisfaction, staff  
58  
59  
60



- 1  
2  
3 resilience, and post-traumatic growth. *Int J Ment Health Nurs* 2015;24(5):403-412.  
4  
5 doi.org/10.3389/fpsyt.2018.00059  
6  
7  
8 19 Findorff MJ, McGovern PM, Wall MM, Gerberich SG. Reporting violence to a health care  
9  
10 employer: a cross-sectional study. *AAOHN journal* 2005;53(9):399-406.  
11  
12 doi:10.1177/216507990505300906  
13  
14 20 Gillespie GL, Leming-Lee TS, Crutcher T, Mattei J. Chart It to Stop It. *J Nur Care Qual*  
15  
16 2016;31(3):254-61. doi:10.1097/NCQ.0000000000000172  
17  
18 21 Clements PT, DeRanieri JT, Clark K, Manno MS, Kuhn DW. Workplace violence and  
19  
20 corporate policy for health care settings. *Nur Econ* 2005;23(3):119-124.  
21  
22  
23 22 Kennedy MP. Violence in emergency departments: under-reported, unconstrained, and  
24  
25 unconscionable. *Med J Aust* 2005;183(7):362-365. doi:10.5694/j.1326-  
26  
27 5377.2005.tb07084.x  
28  
29  
30 23 Chen C, Smith PM, Mustard C. Gender differences in injuries attributed to workplace  
31  
32 violence in Ontario 2002–2015. *Occup Environ Med* 2019;76(1):3-9.  
33  
34 doi:10.1136/oemed-2018-105152  
35  
36  
37 24 Inail. Violenza, aggressione e non solo. Dati Inail 2018. Available at  
38  
39 <https://www.inail.it/cs/internet/docs/alg-dati-inail-2018-novembre.pdf>  
40  
41  
42 25 Ministero della Salute. Raccomandazione per prevenire gli atti di violenza a danno degli  
43  
44 operatori sanitari. Raccomandazione n. 8, novembre 2007.  
45  
46 [http://www.salute.gov.it/portale/documentazione/p6\\_2\\_2\\_1.jsp?id=721](http://www.salute.gov.it/portale/documentazione/p6_2_2_1.jsp?id=721)  
47  
48  
49 26 Hopkins L, Taylor L, Bowen E, Wood C. A qualitative study investigating adolescents'  
50  
51 understanding of aggression, bullying and violence. *Child Youth Serv Rev*  
52  
53 2013;35(4):685-93. doi:10.1016/j.childyouth.2013.01.012  
54  
55  
56 27 Patton MQ. Qualitative research and evaluation methods. Thousand Oaks, CA: Sage  
57  
58 2002:339-427.  
59  
60

- 1  
2  
3 28 Ritchie J, Lewis J, Nicholls CM, Ormston R, eds. Qualitative research practice: A guide  
4  
5 for social science students and researchers. Thousand Oaks, CA: Sage 2013.  
6  
7  
8 29 Fetters MD, Curry LA, Creswell JW. Achieving integration in mixed methods designs—  
9  
10 principles and practices. *Health Serv Res* 2013;48:2134-56. doi:10.1111/1475-  
11  
12 6773.12117  
13  
14 30 Arnetz JE., Hamblin L, Essenmacher L, Upfal MJ, Ager J, Luborsky M. Understanding  
15  
16 patient-to-worker violence in hospitals: a qualitative analysis of documented incident  
17  
18 reports. *J Adv Nurs* 2015;71(2):338-348. doi:10.1111/jan.12494  
19  
20  
21 31 Ramacciati N, Ceccagnoli A, Addey B, Rasero L. Violence towards emergency nurses.  
22  
23 The Italian national survey 2016: A qualitative study. *Int J Nurs Stud* 2018;81:21-29.  
24  
25 doi:10.1016/j.ijnurstu.20  
26  
27  
28 32 Shahzad A, Malik RK. Workplace Violence: An Extensive Issue for Nurses in Pakistan—  
29  
30 A Qualitative Investigation. *J Interpers Violence* 2014;29,11:2021-2034.  
31  
32 doi:10.1177/088626051351600518.01.017  
33  
34  
35 33 Tucker AL, Spear SJ. Operational failures and interruptions in hospital nursing. *Health*  
36  
37 *Serv Res* 2006; 41(3p1):643-662. doi:10.1111/j.1475-6773.2006.00502.x  
38  
39  
40 34 Agresti A. Categorical Data Analysis (3<sup>rd</sup> ed.). Hoboken, New Jersey: John Wiley & Sons  
41  
42 Inc. 2002:267-313.  
43  
44  
45 35 Matteucci MC, Tomasetto C. Alceste: un software per l'analisi dei dati testuali. In: Mazzara  
46  
47 BM, ed. *Metodi qualitativi in psicologia sociale*. Roma: Carocci 2002:305-27.  
48  
49 36 Riff D, Lacy S, Fico F. Analyzing media messages: Using quantitative content analysis in  
50  
51 research. New York: Routledge. 2014. doi:10.4324/9780203551691  
52  
53  
54 37 Reinert M. Un logiciel d'analyse lexicale. *Cahiers de l'analyse des données* 1986;11(4):471-  
55  
56 81.  
57  
58  
59  
60

- 1  
2  
3 38 Reinert, M. Mondes lexicaux et topoi dans l'approche de Alceste. [Lexical worlds and topoi  
4 in Alceste approach] In: S. Mellet & M. Vuillome, eds. Mots chiffrés et déchiffrés  
5 [Coded and decoded words]. Paris, France: Honoré Champion Editeur 1998:289-303.  
6  
7  
8  
9  
10 39 Annese S, Mininni G. La focus group discussion tra analisi del contenuto e analisi del  
11 discorso. In Mazzara BM, ed. Metodi qualitativi in psicologia sociale. Roma: Carocci  
12 2002:125-48.  
13  
14  
15  
16 40 Burla L, Knierim B, Barth J, Liewald K, Duetz M, Abel T. From text to codings: intercoder  
17 reliability assessment in qualitative content analysis. *Nurs Res* 2008;57(2):113-7. doi:  
18  
19  
20 41 Brockmann, M. New perspectives on violence in social care. *Journal of Social*  
21  
22  
23  
24  
25  
26 42 Graydon J, Kasta W, Khan P. Verbal and physical abuse of nurses. *Can J Nurs Adm*  
27  
28  
29  
30 43 Griffiths A, Schabracq MJ. Work and health psychology as a scientific discipline: Facing  
31 the limits of the natural science paradigm. In: Schabracq MJ, Winnubst JAM, Cooper  
32 CL, eds. The handbook of work and health psychology. New York: Wiley 2003:173-  
33  
34  
35  
36  
37  
38  
39 44 Coyle A. Introduction to qualitative psychological research. In: Lyons E, Coyle A, eds.  
40  
41  
42  
43  
44  
45  
46 45 Findorff MJ, McGovern PM, Wall MM, Gerberich SG. Reporting violence to a health care  
47 employer: a cross-sectional study. *AAOHN Journal* 2005;53(9):399-406.  
48  
49  
50 46 Amaratunga D, Baldry D, Sarshar M, Newton R. Quantitative and qualitative research in  
51 the built environment: application of "mixed" research approach. *Work*  
52  
53  
54  
55  
56  
57  
58  
59  
60

- 1  
2  
3 47 Sandelowski M. Combining qualitative and quantitative sampling, data collection, and  
4  
5 analysis techniques in mixed-method studies. *Res Nurs & Health* 2000;23(3):246-255.  
6  
7 doi:10.1002/1098240X(200006)23:3<246::AID-NUR9>3.0.CO;2-H  
8  
9  
10 48 Potera C. Violence against nurses in the workplace. *Am J Nurs* 2016;116(6):20-21.  
11  
12 doi:10.1097/01.NAJ.0000484226.30177.ab  
13  
14 49 Rippon TJ. Aggression and violence in health care professions. *J Adv*  
15  
16 *Nurs* 2000;31(2):452-460.  
17  
18  
19  
20  
21  
22  
23  
24  
25  
26  
27  
28  
29  
30  
31  
32  
33  
34  
35  
36  
37  
38  
39  
40  
41  
42  
43  
44  
45  
46  
47  
48  
49  
50  
51  
52  
53  
54  
55  
56  
57  
58  
59  
60

1  
2  
3  
4  
5  
6  
7  
8  
9  
10  
11  
12  
13  
14  
15  
16  
17  
18  
19  
20  
21  
22  
23  
24  
25  
26  
27  
28  
29  
30  
31  
32  
33  
34  
35  
36  
37  
38  
39  
40  
41  
42  
43  
44  
45  
46  
47  
48  
49  
50  
51  
52  
53  
54  
55  
56  
57  
58  
59  
60

Figure 1. *Text corpus of administrative records compiled by female HCWs victims of workplace violence. Dendrogram of stable classes.*

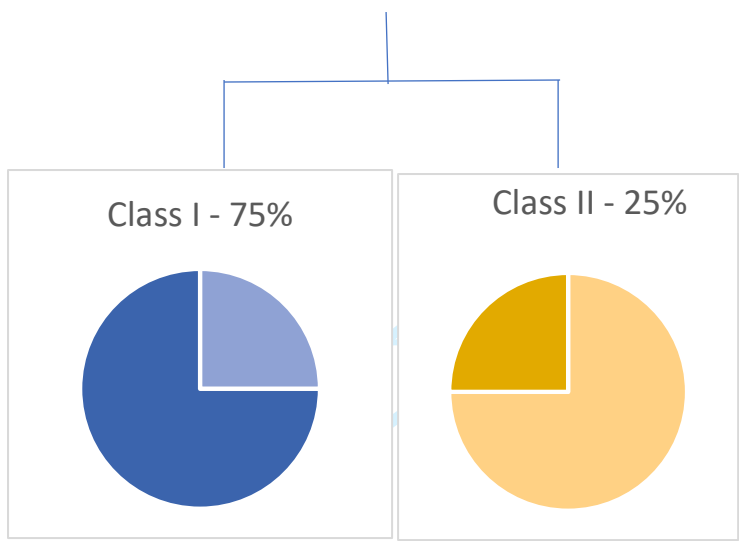

Figure 2. Text corpus of administrative records compiled by male HCWs victims of workplace violence. Dendrogram of stable classes.

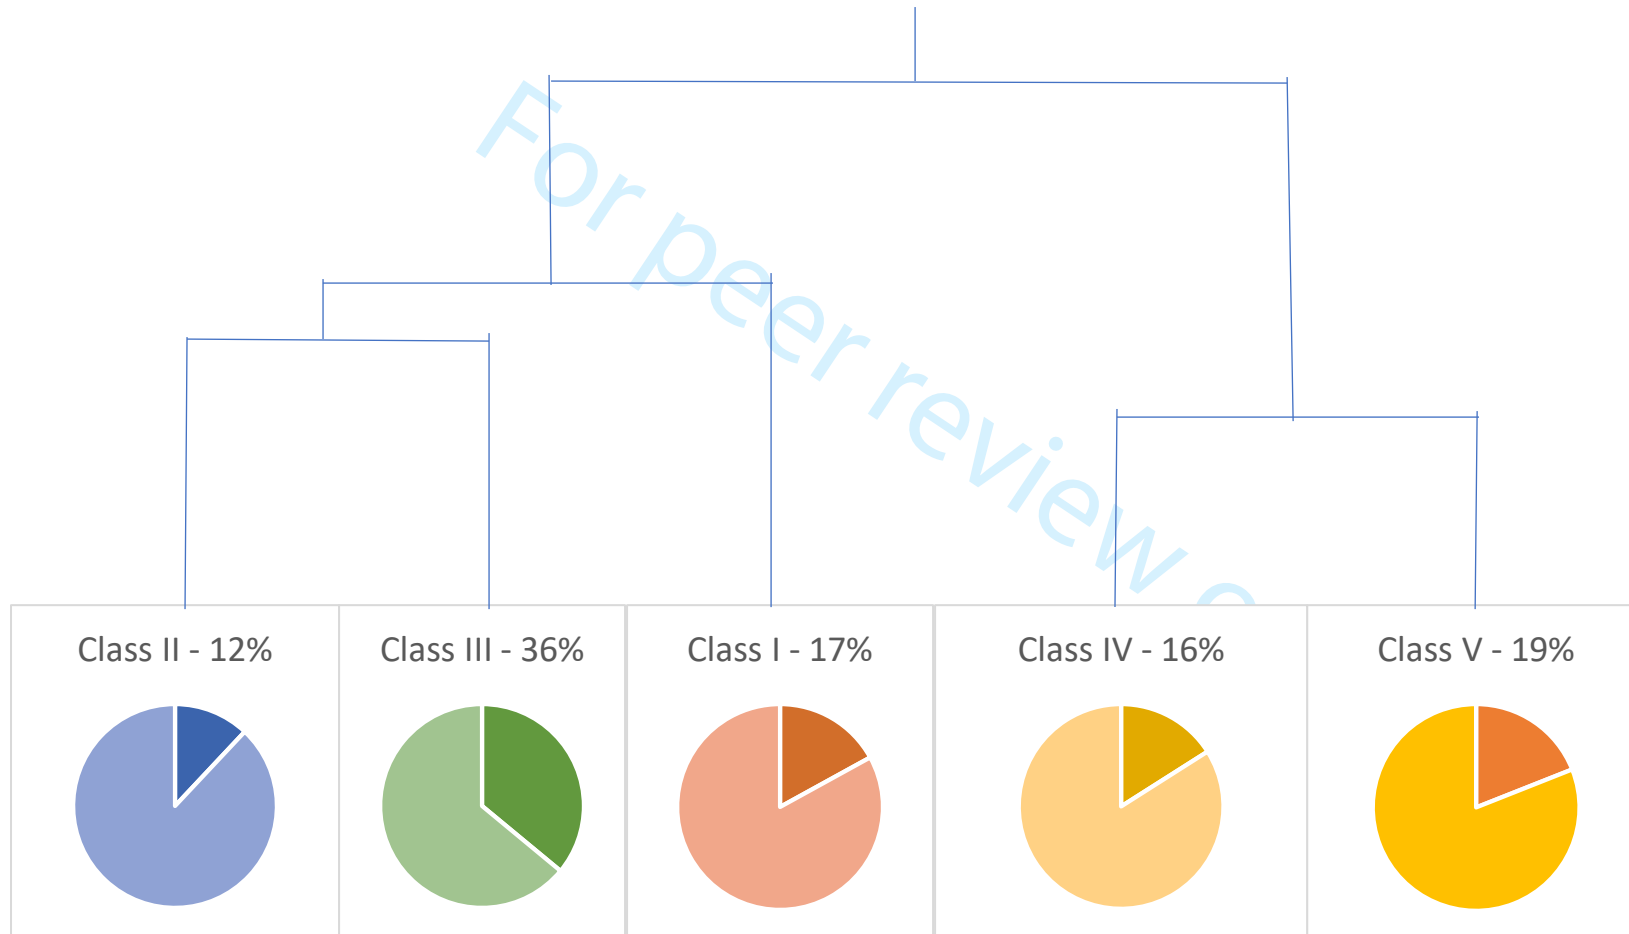

# BMJ Open

## Gender differences in reporting workplace violence: A qualitative analysis of administrative records of violent episodes experienced by healthcare workers in a large public Italian hospital

|                                 |                                                                                                                                                                                                                                                                                                                                                                                                                                                                              |
|---------------------------------|------------------------------------------------------------------------------------------------------------------------------------------------------------------------------------------------------------------------------------------------------------------------------------------------------------------------------------------------------------------------------------------------------------------------------------------------------------------------------|
| Journal:                        | <i>BMJ Open</i>                                                                                                                                                                                                                                                                                                                                                                                                                                                              |
| Manuscript ID                   | bmjopen-2019-031546.R1                                                                                                                                                                                                                                                                                                                                                                                                                                                       |
| Article Type:                   | Original research                                                                                                                                                                                                                                                                                                                                                                                                                                                            |
| Date Submitted by the Author:   | 10-Sep-2019                                                                                                                                                                                                                                                                                                                                                                                                                                                                  |
| Complete List of Authors:       | Acquadro Maran, Daniela; University of Turin, Department of Psychology<br>Cortese, Claudio Giovanni; University of Turin, Department of Psychology<br>PAVANELLI, Pierluigi ; Azienda Ospedaliero Universitaria Città della<br>Salute e della Scienza di Torino<br>Fornero, Giulio ; Azienda Ospedaliero Universitaria Città della Salute e<br>della Scienza di Torino<br>Gianino, Maria Michela; University of Turin, Department of Public Health<br>Sciences and Pediatrics |
| <b>Primary Subject Heading</b>: | Medical management                                                                                                                                                                                                                                                                                                                                                                                                                                                           |
| Secondary Subject Heading:      | Qualitative research                                                                                                                                                                                                                                                                                                                                                                                                                                                         |
| Keywords:                       | Human resource management < HEALTH SERVICES ADMINISTRATION & MANAGEMENT, healthcare workers, workplace violence, qualitative analysis, gender difference, Health & safety < HEALTH SERVICES ADMINISTRATION & MANAGEMENT                                                                                                                                                                                                                                                      |
|                                 |                                                                                                                                                                                                                                                                                                                                                                                                                                                                              |

SCHOLARONE™  
Manuscripts

1  
2  
3 **Gender differences in reporting workplace violence:**  
4

5 **A qualitative analysis of administrative records of violent episodes experienced by**  
6  
7 **healthcare workers in a large public Italian hospital**  
8  
9

10 ACQUADRO MARAN Daniela<sup>1</sup>, CORTESE Claudio Giovanni<sup>1</sup>, PAVANELLI Pierluigi<sup>2</sup>,  
11  
12 FORNERO Giulio<sup>2</sup>, GIANINO Maria Michela<sup>3</sup>  
13  
14

15  
16  
17 <sup>1</sup> Department of Psychology, University of Turin, Turin, Italy  
18

19 <sup>2</sup> AOU Città della salute e della Scienza Teaching Hospital, Turin, Italy  
20

21 <sup>3</sup> Department of Public Health Sciences and Pediatrics, University of Turin, Italy  
22  
23

24  
25  
26 *Corresponding author (c. a.):* Claudio Giovanni CORTESE, Phd, Full Professor, Department  
27  
28 of Psychology, University of Turin, Via Verdi 10, Turin, Italy. E-mail:  
29  
30 claudio.cortese@unito.it, phone +39 011. 6702040  
31  
32

33  
34  
35 - Daniela ACQUADRO MARAN, Phd, Assistant Professor, Department of Psychology,  
36  
37 University of Turin, Turin, Italy. E-mail: daniela.acquadro@unito.it  
38

39  
40 - Claudio Giovanni CORTESE, Phd, Full Professor, Department of Psychology, University of  
41  
42 Turin, Turin, Italy. E-mail: claudio.cortese@unito.it  
43

44 - Pierluigi PAVANELLI, MD, Director, Security and Environment Unit (S.P.P.), AOU Città  
45  
46 della salute e della Scienza Teaching Hospital, Turin, Italy. E-mail:  
47  
48 ppavanelli@cittadellasalute.to.it  
49

50  
51 - Giulio FORNERO, MD, Director, Quality and Safety of Care Paths Department, AOU Città  
52  
53 della salute e della Scienza Teaching Hospital, Turin, Italy. E-mail:  
54  
55 gfornero@cittadellasalute.to.it  
56  
57  
58  
59  
60



1  
2  
3 - Maria Michela GIANINO, Associate Professor, Department of Public Health Sciences and  
4  
5 Pediatrics, University of Turin, Turin, Italy. E-mail: mariola.gianino@unito.it  
6  
7

8  
9 Word count: 4827  
10  
11  
12  
13  
14  
15  
16  
17  
18  
19  
20  
21  
22  
23  
24  
25  
26  
27  
28  
29  
30  
31  
32  
33  
34  
35  
36  
37  
38  
39  
40  
41  
42  
43  
44  
45  
46  
47  
48  
49  
50  
51  
52  
53  
54  
55  
56  
57  
58  
59  
60

For peer review only

## Gender differences in reporting workplace violence:

### A qualitative analysis of administrative records of violent episodes experienced by healthcare workers in a large public Italian hospital

#### ABSTRACT

**Objectives:** This study aims to analyse, from a descriptive and qualitative point of view, the episodes of violence reported by healthcare workers (HCWs) in a large public Italian hospital. Qualitative analysis permits us to collect the victims' words used to describe the event and the ways in which they dealt with it. A comparison between genders was performed to better understand what type of different strategies could be used to improve the prevention of workplace violence for HCWs.

**Design and Setting:** The retrospective observational study was carried out in "Città della Salute e della Scienza", a complex of four interconnected hospitals situated in northern Italy. This study analysed aggression data from the four-year period of 2015-2018 that included all HCW categories. The data were obtained from the Aggression Reporting Form.

**Participants:** The analysed records were supplied by 396 HCWs (3.6% of all HCWs in the hospital).

**Results:** Male HCWs aged < 30 years did not report violent episodes that occurred in the workplace, while male HCWs with 6-15 years of work experience reported more violent episodes than their female counterparts. Among the HCW professions, nursing was the profession in which HCWs were more prone to experience a violent episode, while male medical doctors were more prone to report violent episodes than female medical doctors. Moreover, female HCWs experienced more verbal violence (insults) than male HCWs did, while male HCWs experienced more physical violence (bodily contact) than female HCWs did.

1  
2  
3 **Conclusions:** The findings from this explorative study suggest that there is a gender  
4 difference in the characteristics of workplace violence perpetrated by patients, patients'  
5 relatives and visitors and in the way in which these episodes are described. Consequently, it is  
6 important for informative and preventive courses to consider gender differences in  
7 experiencing a violent episode.  
8  
9

### 14 **Strengths and limitations of this study**

16 (Strength) A qualitative analysis was used to collect the victims' descriptions of workplace  
17 violence.  
18

19 (Strength) The method permits the capture of respondents' points of view.  
20

21 (Strength) The comparison between genders could be useful to improve the prevention of  
22 workplace violence in this population.  
23

24 (Limitation) It was not possible to overcome the bias in reporting violence.  
25

26 (Limitation) Unreported incidents could not be included in the study.  
27

28 **Keywords:** healthcare workers; workplace violence; qualitative analysis; gender difference;  
29 reported incidents.  
30  
31  
32

### 33 **INTRODUCTION**

34  
35  
36  
37  
38  
39  
40  
41  
42 Workplace violence has been defined by the World Health Organization as "the intentional  
43 use of power, threatened or actual, against another person or against a group, in work-related  
44 circumstances, that either results in or has a high degree of likelihood of resulting in injury,  
45 death, psychological harm, maldevelopment, or deprivation"[1].  
46  
47  
48  
49

50  
51 As noted by several investigations [2-4], the healthcare sector is at particular risk of  
52 workplace violence. Elliot [5] estimated that the risk of violence from patients and their  
53 relatives towards healthcare workers (HCWs) is 16 times higher than that towards other  
54 workers. This risk is highest for healthcare workers working in psychiatric wards and  
55  
56  
57  
58  
59  
60

1  
2  
3 emergency rooms [6-7] since they report more violent events than other HCWs, such as those  
4  
5 working in wards [8-10]. As suggested by Renwick and colleagues [11], it is possible that  
6  
7 subjects who work in other wards have biased their answers, presenting themselves as at less  
8  
9 risk than they are in reality because of such complex reasons as denial and social stigma of  
10  
11 reporting workplace violence. At the same time, working in wards with patients who are more  
12  
13 dangerous because they suffer from mental illness (psychiatric ward) or are under the  
14  
15 influence of drugs or alcohol (emergency room), may make workers who are victims of  
16  
17 violence feel more comfortable about reporting violent episodes.  
18  
19  
20

21  
22 Moreover, the risk of aggression is highest for HCWs working as nurses since they  
23  
24 report more violent episodes than do physicians and administrative staff [12]. A possible  
25  
26 explanation for this finding is linked with the nature of their job, as nurses have direct contact  
27  
28 with patients (who could be confused, frightened, or delirious) and their families/friends [13-  
29  
30 15]. In this case, a possible explanation could be found in the sample bias, since in the  
31  
32 literature about nurses being assaulted, respondents who had been assaulted would be  
33  
34 expected to have a higher rate of response than those who had not been assaulted [16].  
35  
36  
37

38  
39 Another possible explanation is linked to gender: in some countries, such as Italy, in  
40  
41 more than 70% of cases, nurses are female [17], and some studies have shown that female  
42  
43 workers are more often affected by violence than their male colleagues [18-19]. Gender is  
44  
45 also related to the type of violence experienced by HCWs; the investigation by Magnavita and  
46  
47 Heponiemi [10] showed that, in hospitals, female nurses experienced verbal violence (such as  
48  
49 yelling and screaming) more often than male nurses, who were more often victims of physical  
50  
51 assault (such as hitting and kicking). Moreover, the importance of investigating the gender  
52  
53 difference in workplace violence experienced by HCWs was noted by Lawoko and colleagues  
54  
55 [14]: “intervention/prevention measures need to review the gender and profession issue. It is  
56  
57 likely that men and women, psychiatrists and nurses may require different interventions  
58  
59  
60

1  
2  
3 related to their specific problems” (page 51). These types of violent episodes affect the  
4  
5 perceived wellbeing of HCWs and could lead to several consequences, such as the  
6  
7 interruption of work, medical treatment, and hospital and/or home care; psychological support  
8  
9 might be needed for the HCWs to cope with the event [20]. Workplace violence might also  
10  
11 lead staff to leave the profession [21].  
12  
13

14  
15 Furthermore, workplace violence in this sector could be related to turnover intention  
16  
17 through occupational stress first and then burnout [22]: regarding this, Kim and colleagues  
18  
19 [23] suggested that the prevention of workplace violence is one way of reducing burnout in  
20  
21 the healthcare sector.  
22  
23

24  
25 An interesting question concerns the reports made by HCWs regarding violent  
26  
27 episodes in the workplace. Findings from investigations have shown that violence, especially  
28  
29 verbal violence [2], in the healthcare sector is under-reported [24-25]. The under-reporting of  
30  
31 violence is not a phenomenon that involves only workplace violence. All forms of violence  
32  
33 (sexual harassment, domestic violence, school bullying, and so on) are under-reported for  
34  
35 different reasons, including both the stigma of victimization, such as shame, isolation, and  
36  
37 fear, and the threat of further violence, which often deter victims from reporting violent  
38  
39 episodes [26].  
40  
41

42  
43 Moreover, for HCWs, there is a risk of desensitization to violence, as violence – due to  
44  
45 contact with frail and ill people – is perceived as part of an HCW’s job [27]. Nevertheless, the  
46  
47 reporting of any act of violence is fundamental in engaging hospital management to activate  
48  
49 appropriate organizational responses. Indeed, the administrative records of violent episodes  
50  
51 experienced by HCWs constitute an important source of information [28] about the type of  
52  
53 violence (physical or verbal), the type of perpetrator (patient, relative, or visitor), the type of  
54  
55 HCW (administrator, midwife, nurse, or physician), the place in which the HCW experienced  
56  
57 the violence (psychiatric ward, emergency room, or ward) and the type of activity that she/he  
58  
59  
60

1  
2  
3 was doing (support activity for patients, professional team back-office activity, or assistance  
4 and patient care). These records permit the prevention of workplace violence, providing  
5 information about, for example, the type of training course that a particular HCW sub-  
6 population needs and/or the safety devices that should be installed in a particular ward.  
7  
8  
9

10  
11  
12 In Europe, the Fifth European Working Conditions Survey [29] shows that, on  
13 average, 14.9% of workers reported levels of subjection to adverse social behaviour, and the  
14 highest level was in the healthcare sector (23%). The overall percentage of reported levels of  
15 subjection to adverse social behaviour in Italian workers was 8%; in the healthcare sector, this  
16 percentage was 41.4% of the workers [30]. There were 1200 total violent behaviours reported  
17 by HWCs in 2018. In most cases, (70%), the victim was female, and the perpetrator was a  
18 patient, a patient's relative or a visitor [31]. To deal with this phenomenon, in 2007, the  
19 Italian Ministry of Health published Recommendation no. 8, "Preventing acts of violence  
20 against health workers". This recommendation had several goals. First, it oversees the  
21 reporting of incidents of violence using official sources, such as the judicial authority, the  
22 police forces and the National Workplace Accident Institute. Second, it promotes the  
23 collection of data through specific surveys to identify the frequency and severity of violent  
24 episodes. The results could be useful for adopting appropriate action from an organizational  
25 and structural point of view, for example, redesigning the space and/or reformulating  
26 procedures for access to the ward. Moreover, data could be used to improve the training  
27 courses that aim to prevent violence, to improve the coping strategies and to reduce the  
28 negative consequences [32].  
29  
30  
31  
32  
33  
34  
35  
36  
37  
38  
39  
40  
41  
42  
43  
44  
45  
46  
47  
48  
49  
50

51 This study aims to analyse, from a descriptive and qualitative point of view, the  
52 episodes of violence experienced by HCWs working in a large public Italian hospital. The  
53 qualitative analysis permits us to collect the victims' words used to describe the event and the  
54 ways in which they dealt with it [33]. The advantage offered by this method is that it allows  
55  
56  
57  
58  
59  
60

1  
2  
3 us to capture respondents' points of view without predetermining their answers [34-35]. This  
4  
5 approach is widely used in social science research [36] and has been used to investigate  
6  
7 HCWs' perceptions of physical and verbal aggression [8, 37-38]. It has also been used, for  
8  
9 example, to investigate the descriptions of violent behaviour provided by workers [39] and  
10  
11 perceptions of the organizational safety climate [40].  
12  
13

14  
15 A comparison between genders was used to better understand what type of  
16  
17 differences, if any, could be used to improve the prevention of workplace violence for HCWs.  
18  
19 Based on the literature review presented above, the hypothesis is that there are gender  
20  
21 differences in the violent episodes experienced by female and male HCWs: female HCWs  
22  
23 experience more verbal violence than their male colleagues, and male HCWs experience more  
24  
25 physical violence than their female colleagues. Moreover, from the analysis of the episodes,  
26  
27 as described by female and male HCWs, we expected that the observed semantic differences  
28  
29 characterized the experience of victimization. This is the novel contribution of this work. We  
30  
31 do not have specific hypotheses about the relationship between gender and the lexical words  
32  
33 used to define the violent episodes; therefore, we intend to analyse this relationship from an  
34  
35 explorative perspective.  
36  
37  
38

## 39 40 **METHOD**

41  
42 The retrospective observational study was carried out in Città della Salute e della Scienza  
43  
44 (City of Health and Science University Hub), a complex of four interconnected hospitals  
45  
46 situated in northern Italy. It has 1917 ordinary hospital beds and more than 400 day hospital  
47  
48 and day surgery beds, and it is one of the largest national and European health hubs, boasting  
49  
50 approximately twelve thousand employees. This study analysed aggression data from the  
51  
52 four-year period of 2015-2018 that included all worker categories. The data were obtained  
53  
54 from the Aggression Reporting Form adopted in 2014 in compliance with the  
55  
56 abovementioned recommendation of the Ministry of Health. The form is available on the  
57  
58  
59  
60

1  
2  
3 intranet portal, and all parts of the form must be completed by victims of assault within 72  
4  
5 hours of the event and sent to the Safety and Environment Office. Each administrative record  
6  
7 of a violent episode contains the following information: the sociodemographic data of the  
8  
9 victim (age, gender, years of experience, and profession), workplace in which the violent  
10  
11 episode occurred (psychiatric ward, emergency room or ward - 1 item), the type of activity  
12  
13 performed by the HCW at the moment of aggression (i.e., conversation), the HCW's shift at  
14  
15 the time of aggression, the type of aggressor (the perpetrator could be more than one person:  
16  
17 patient, patient's relative, or visitor – 3 items, yes/no answers), the misconduct (violent  
18  
19 behaviour could be of more than one type: insult, verbal threat, bodily contact, throwing  
20  
21 objects, or use of a weapon – 5 items, yes/no answers), the consequences (consequences could  
22  
23 be of more than one type: interruption of work, medical treatment, psychological support,  
24  
25 hospital care, home care, or no consequence – 5 items, yes/no answers), the possibility of  
26  
27 preventing the attack (1 item, yes/no answer), and the description of the event. Similar to  
28  
29 other investigations (see Magnavita and Heponiemi [10]), age was categorized as <30 years,  
30  
31 30-39 years, 40-49 years, and  $\geq 50$  years, and the years of experience were classified as  $\leq 5$   
32  
33 years, 6-15 years, 16-25 years, and  $> 25$  years (1 item each). The type of activity was  
34  
35 categorized as support activity for patients (e.g., meal preparation and administration),  
36  
37 professional team back-office activity (e.g., treatment prescriptions), and assistance and  
38  
39 patient care (e.g., assistance at the front desk) [41] (1 item). The profession was categorized as  
40  
41 midwife, nurse, medical doctor, administrative staff or technician (such as a radiologist) (1  
42  
43 item). The work shift in which the aggression occurred was categorized as morning (6:00-  
44  
45 12:00), afternoon (12:00-18:00), evening (18:00-24:00) or night (0:00-6:00) (1 item).  
46  
47  
48  
49  
50  
51  
52  
53

## 54 Procedure

55  
56 Data were analysed by the authors of this paper and by assistants trained by researchers. After  
57  
58 the approval of the Local Ethics Committee (Comitato di Bioetica dell'Ateneo, University of  
59  
60



1  
2  
3 Torino, Prot. 19468 January 17, 2019) was received, the administrative records of violent  
4  
5 episodes were consulted in January-February 2019. Records were transcribed in a database;  
6  
7 sensitive data (name, surname and worker's registration number) were omitted. This  
8  
9 procedure was in accordance with the code of ethics of the Italian Association of Professional  
10  
11 Psychologists and with Italian law concerning privacy. The files that constituted the corpus of  
12  
13 administrative records were saved in a folder. Overall, the sample contained 418 records. The  
14  
15 inclusion criteria for the episodes in this analysis were the record describing the case of  
16  
17 violence perpetrated by a patient, a relative or a visitor. Thus, 14 records were excluded  
18  
19 because the perpetrator was a colleague, a subordinate or a supervisor. Moreover, eight  
20  
21 records were excluded because the gender of the victim was omitted. Therefore, 396 records  
22  
23 were included in the present work.  
24  
25  
26  
27

### 28 **Data analysis**

29  
30 Descriptive statistics were calculated using IBM SPSS Statistics, version 24. Descriptive  
31  
32 measures (mean  $\pm$  SD) were calculated for all the continuous variables. Because of the  
33  
34 categorical nature of the data,  $\chi^2$  tests were used to examine gender differences, followed by  
35  
36 effect-size calculations (Phi and Cramer's V) to estimate the practical significance of the  
37  
38 differences. As a post hoc test, standardized Pearson residuals (from this point forward: SPRs)  
39  
40 were calculated for each cell to determine which cell differences contributed to the  $\chi^2$  test  
41  
42 results. SPRs with absolute values greater than 1.96 indicated that the number of cases in that  
43  
44 cell was significantly larger than would be expected (in terms of over- or underrepresentation)  
45  
46 if the null hypothesis were true, with a significance level of .05 [42].  
47  
48  
49

50  
51 As suggested by Matteucci and Tomasetto [43], content analysis was used to process  
52  
53 the written description of the violent episodes. Content analysis is defined as "the systematic  
54  
55 assignment of communication content to categories according to rules and the analysis of  
56  
57 relationships involving those categories using statistical methods" [44, p. 3]. These data were  
58  
59  
60

1  
2  
3 analysed using *Alceste 6.0* [45]. This software permits the analysis of written data according  
4 to a descending hierarchical classification (DHC) in which the text is divided into elementary  
5 context units and categorized into homogeneous classes. The software allows for the isolation  
6 and separation of internally homogeneous groups (or classes) within specific populations.  
7  
8 Classes are formed on the basis of the co-occurrence of forms and units of context [43]. The  
9 software uses symbols to indicate the type of root. If the word is followed by the symbol <,  
10 this indicates that only the root of the word is recognized (e.g., aggressi< denotes the words  
11 aggressive, aggression, and aggressively). The symbol + indicates the identification of the  
12 termination and of different forms with the same root (e.g., nurse+ indicates the words nurse  
13 and nurses). The first class that is formed will be the most homogeneous in terms of content,  
14 i.e., the one whose lexical universe (a specific vocabulary that is used and to which the  
15 speaker attributes relevant meaning) appears to differ from those of others. The software  
16 performs the  $\chi^2$  test on the association between words and classes to identify the specific  
17 vocabulary for each class. This step allows the researcher to identify the lexical worlds in the  
18 text, i.e., the “usual places” (conventional themes) of discourse [46]. The software allows for  
19 repeated segments to be highlighted, i.e., associations of the most frequent words in a class  
20 and related classes with the selected variables. These are called illustrative variables and carry  
21 further information about the textual corpus, allowing the researcher to identify the specific  
22 characteristics that define individuals who share the same semantic universe.  
23  
24  
25  
26  
27  
28  
29  
30  
31  
32  
33  
34  
35  
36  
37  
38  
39  
40  
41  
42  
43  
44  
45

46  
47 In this study, the findings from the descriptive analysis were used as illustrative  
48 variables for the text analysis. An example of an illustrative variable is \*midwife, which  
49 indicates the profession of the HCW who draws up the administrative record to report the  
50 violence experienced in the workplace. The resulting data were examined by three  
51 independent and autonomous subjects, as suggested by Annese and Mininni [47]. This phase  
52 was followed by a discussion of the meaning attributed to the data to reach an agreement on  
53  
54  
55  
56  
57  
58  
59  
60

1  
2  
3 the results. Consistency was guaranteed by reproducibility (or intercoder reliability -[48];  
4  
5 Cohen's  $k = .85$ ).  
6  
7

## 8 **Patient and public involvement**

9

10  
11 No patient involved.  
12  
13

## 14 **Data availability statement**

15

16  
17 No additional data available.  
18  
19

## 20 **RESULTS**

21  
22

### 23 **Descriptive analysis**

24  
25

26 Overall, the records were compiled by 396 HCWs (3.6% of all HCWs working in the  
27  
28 hospital). A total of 302 HCWs (76.3%) were female, representing approximately 4% of the  
29  
30 entire female HCW population; 94 (23.7%) were male, representing 3.1% of the entire male  
31  
32 HCW population. Most of the HCWs were aged 40-49 years (146, 36.9%; 4.7% of the entire  
33  
34 HCW population aged 40-49 years). Regarding years of experience, most HCWs were in the  
35  
36 range of 6-15 years (181, 46.3%; 6.1% of the entire HCW population with 6-15 years of  
37  
38 experience). Two hundred ninety-eight HCWs (76.2%) were nurses (26.6% of the entire nurse  
39  
40 population), 53 (13.6%) were midwives (25.4% of the entire midwife population), 22 (5.6%)  
41  
42 were medical doctors (1.2% of the entire medical doctor population), 15 (3.8%) were  
43  
44 administrative staff (1.7% of the entire administrative staff population) and 3 (0.8%) were  
45  
46 technicians (0.5% of the entire technician population). Table 1 presents the sociodemographic  
47  
48 characteristics of the female and male HCWs who experienced violence.  
49  
50  
51  
52

53  
54 Regarding the age of the victims, the findings showed a statistically significant  
55  
56 difference between genders (Cramer's  $V = 0.16$ ). In particular, there were no male victims  
57  
58 aged <30 years ( $|SPR| = -2.0$ ). Male HCWs with 6-15 years of experience referred more  
59  
60

frequently to episodes of violence ( $|SPR| = 1.7$ , Cramer's  $V = 0.16$ ) than did female HCWs. Moreover, male medical doctors referred more frequently to episodes of violence than did female doctors, and these episodes of violence occurred more frequently for male medical doctors ( $|SPR| = 2.5$ , Cramer's  $V = 0.18$ ). The perpetrator was a patient's relative for more female HCWs than male HCWs (52% and 37.2%, respectively,  $p = .012$ ), while the perpetrator was a visitor for more male HCWs than female HCWs (5.3% and 1.3%, respectively,  $p = .023$ ). Regarding consequences, home care was indicated by male HCWs, while female HCWs did not mention it.

Table 1. Sociodemographic characteristics of the female and male HCWs who experienced violence. The percentages (N = 396) are in brackets.

|                                            | Female<br><i>n</i> = 302 | Male<br><i>n</i> = 94 | $\chi^2$ | <i>p</i> |
|--------------------------------------------|--------------------------|-----------------------|----------|----------|
| Age:                                       |                          |                       | 9.45     | .024     |
| - <30 years                                | 17(5.7)                  | -                     |          |          |
| - 30-39 years                              | 83(27.9)                 | 18(19.4)              |          |          |
| - 40-49 years                              | 105(35.4)                | 41(44.1)              |          |          |
| - $\geq 50$ years                          | 92(31)                   | 34(36.6)              |          |          |
| Years of experience:                       |                          |                       | 10.24    | .017     |
| - $\leq 5$                                 | 44(14.8)                 | 6(6.5)                |          |          |
| - 6-15                                     | 128(43)                  | 53(57)                |          |          |
| - 16-25                                    | 80(26.8)                 | 27(29)                |          |          |
| - >25                                      | 46(15.4)                 | 7(7.5)                |          |          |
| Profession:                                |                          |                       | 13.11    | .011     |
| - Midwife                                  | 39(13.1)                 | 14(15.1)              |          |          |
| - Nurse                                    | 236(79.2)                | 62(66.7)              |          |          |
| - Medical doctor                           | 11(3.7)                  | 11(11.8)              |          |          |
| - Administrative staff                     | 9(3)                     | 6(6.5)                |          |          |
| - Technician                               | 3(1)                     | -                     |          |          |
| Workplace:                                 |                          |                       | 4.38     | n.s.     |
| - Psychiatric ward                         | 35(38.5)                 | 84(28.3)              |          |          |
| - Emergency room                           | 104(35)                  | 23(25.3)              |          |          |
| - Ward                                     | 109(36.7)                | 33(36.3)              |          |          |
| Type of activity:                          |                          |                       | 3.61     | n.s.     |
| - Support activity for patient             | 125(45.8)                | 40(48.8)              |          |          |
| - Professional team's back-office activity | 77(28.2)                 | 15(18.3)              |          |          |
| - Assistance and patient care              | 71(26)                   | 27(32.9)              |          |          |
| Work shift:                                |                          |                       | 0.55     | n.s.     |
| - Morning                                  | 85(28.5)                 | 30(32.3)              |          |          |
| - Afternoon                                | 124(41.6)                | 36(38.7)              |          |          |
| - Evening                                  | 64(21.5)                 | 20(21.5)              |          |          |
| - Night                                    | 25(8.4)                  | 7(7.5)                |          |          |
| Perpetrator:                               |                          |                       |          |          |

|                                      |           |           |      |      |
|--------------------------------------|-----------|-----------|------|------|
| - Patient                            | 173(57.3) | 56(59.6)  | 0.15 | n.s. |
| - Patient's relative                 | 157(52)   | 35(37.2)  | 6.25 | .012 |
| - Visitor                            | 4(1.3)    | 5(5.3)    | 5.15 | .023 |
| Misconduct:                          |           |           |      |      |
| - Insult                             | 252(83.4) | 67(71.3)  | 6.78 | .009 |
| - Threat                             | 141(46.7) | 42(44.7)  | 0.12 | n.s. |
| - Bodily contact                     | 77(25.5)  | 37(39.4)  | 6.72 | .010 |
| - Throwing objects                   | 42(13.9)  | 20(21.3)  | 2.95 | n.s. |
| - Use of a weapon                    | 14(4.6)   | 5(5.3)    | 0.07 | n.s. |
| Consequences:                        |           |           |      |      |
| - Interruption of work               | 61(64.9)  | 210(69.8) | 0.79 | n.s. |
| - Medical treatment                  | 29(9.6)   | 14(15.1)  | 2.15 | n.s. |
| - Psychological support              | 16(5.3)   | 6(6.4)    | 0.16 | n.s. |
| - Hospital care                      | 2(0.7)    | 1(1.1)    | 0.15 | n.s. |
| - Home care                          | -         | 2(2.2)    | 6.53 | .011 |
| - No consequences                    | 64(21.3)  | 26(28)    | 1.76 | n.s. |
| The attack could have been prevented | 104(40)   | 25(29.4)  | 3.07 | n.s. |

Note. n.s. = not statistically significant.

## Text analysis

Based on findings from the descriptive analysis, age, years of experience and profession were used as illustrative variables. The analysis of the administrative record drawn up by female HCWs showed that the corpus was composed of 14,951 occurrences, 2,739 distinct forms (mean frequency = 13 per form) and 1,345 *hapax*, i.e., words used only once. The overall number of elementary context units was 516. The five most frequent words (associated forms) in the corpus were *patient*+ (n = 329), *aggressi*< (n = 125), *medic*< (n = 62), *wait*< (n = 61), and *staff* (n = 39). The dendrogram of stable classes (Figure 1) shows the classification procedure used to create the two classes that emerged (amount of variance explained = 96.9%). For each class, the first characterizing five words are presented in order of the  $\chi^2$  results (Table 2), together with the associated illustrative variables.

INSERT FIGURE 1 ABOUT HERE

Table 2. Findings from text corpus of administrative records compiled by female HCW victims of workplace violence.

| Class I - <i>Waiting time</i>                 |          | Class II - <i>Physical attack</i>                  |          |
|-----------------------------------------------|----------|----------------------------------------------------|----------|
| <i>Words</i>                                  | $\chi^2$ | <i>Words</i>                                       | $\chi^2$ |
| Visit<                                        | 20       | Kick+                                              | 88       |
| Wait<                                         | 17       | Agitat<                                            | 76       |
| Therap+                                       | 13       | Cris+                                              | 69       |
| Work<                                         | 12       | Personal+                                          | 63       |
| Triage                                        | 11       | Object+                                            | 56       |
| Illustrative variables: emergency room, ward. |          | Illustrative variables: psychiatric ward, midwife. |          |

Class I explained 75% of the variance and was labelled *Waiting time*. The most representative words in terms of  $\chi^2$  describe the violent episodes as a consequence of patients and relatives waiting for a visit or therapy or of the assignment of degrees of urgency to wounds or illnesses to decide the order in which patients will be treated. This waiting time was considered by the perpetrator as unacceptable. The following sentence is an example of how a female HCW described a violent episode.

*“The patient’s relatives were complaining about the waiting time. They could tell that the staff were overworked. The patient’s son and daughter repeatedly came into the emergency room instead of waiting in the hall. The patient’s son said to not annoy him because otherwise there would be trouble”* (nurse, aged 30-39 years, 6-15 years of work)

Class II explained 25% of the variance and was labelled *Physical attack*. This lexical world refers to the behaviours demonstrated by psychiatric patients during routine activities, such as the distribution of meals. Perpetrators were described as patients who suffered from a psychotic crisis and who physically assaulted an HCW. The sentence below provides an example of a respondent’s textual production.

1  
2  
3 “At the end of the dinner, the patient had a crisis; he became aggressive with staff that was  
4 around him and kicked me in the face, cutting my upper lip” (midwife, aged 30-39 years, 6-15  
5 years of experience)  
6  
7  
8

9 The analysis of the administrative record drawn up by male HCWs showed that the  
10 corpus was composed of 3,804 occurrences, 1,271 distinct forms (mean frequency = 9 per  
11 form) and 795 *hapax*, i.e., words used only once. The overall number of elementary context  
12 units was 144. The five most frequent words (associated forms) in the corpus were *patient+* (n  
13 = 103), *aggressi<* (n = 34), *threat+* (n = 29), *person<* (n = 26), and *medic<* (n = 20). The  
14 dendrogram of stable classes (Figure 2) shows the classification procedure used to create the  
15 five classes that emerged (amount of variance explained = 93.6%). For each class, the first  
16 characterizing five words are presented in order of the Chi-squared results (Table 3), together  
17 with the associated illustrative variables.  
18  
19  
20  
21  
22  
23  
24  
25  
26  
27  
28  
29

30  
31 INSERT FIGURE 2 ABOUT HERE  
32  
33  
34  
35  
36

37 Table 3. Findings from text corpus of administrative records compiled by male HCW victims  
38 of workplace violence.  
39  
40  
41

|              |          | <i>Verbal violence</i> |          |              |          | <i>Corporeal assault</i> |          |              |          |
|--------------|----------|------------------------|----------|--------------|----------|--------------------------|----------|--------------|----------|
| Class I      |          | Class II               |          | Class III    |          | Class IV                 |          | Class V      |          |
| <i>Words</i> | $\chi^2$ | <i>Words</i>           | $\chi^2$ | <i>Words</i> | $\chi^2$ | <i>Words</i>             | $\chi^2$ | <i>Words</i> | $\chi^2$ |
| Wait<        | 47       | Insult<                | 48       | Colleague+   | 12       | Launch<                  | 57       | Follow<      | 24       |
| Ask<         | 30       | Staff                  | 11       | Ward         | 11       | Object+                  | 45       | Therap+      | 20       |
| Visit        | 25       | Motiv<                 | 10       | Verbal<      | 11       | Kick+                    | 22       | Nois+        | 19       |
| Time         | 24       | Recei<                 | 9        | Patient+     | 11       | Hit<                     | 16       | Attempt<     | 15       |

| Behaviour+              | 24 | Phon+                   | 9 | Relative+               | 9 | Person<                 | 16 | Violen<                 | 15 |
|-------------------------|----|-------------------------|---|-------------------------|---|-------------------------|----|-------------------------|----|
| Illustrative variables: |    | Illustrative variables: |   | Illustrative variables: |   | Illustrative variables: |    | Illustrative variables: |    |
| emergency room,         |    | emergency room,         |   | ward, medical           |   | psychiatric ward,       |    | psychiatric ward,       |    |
| nurse                   |    | professional team's     |   | doctor, midwife         |   | administrative staff    |    | nurse                   |    |
|                         |    | back-office activity    |   |                         |   |                         |    |                         |    |

The dendrogram (Figure 2) shows the classification procedure used to create the five classes that emerged and highlights which classes are closer and therefore more similar. Specifically, the dendrogram shows that Classes I, II and III are more similar than Classes IV and V. At the same time, Classes IV and V are more similar than the other classes. Classes I, II and III explain – together – 65% of the variance; Classes IV and V explain 35% of the variance.

Classes I, II and III were labelled *Verbal violence*. The words characterizing these classes were related to violent behaviours – such as insults and threats – that HCWs experienced principally in the emergency room and ward, both through direct contact (face to face) and by phone. In these episodes, one or more colleagues were involved. Below are some examples from the descriptions of violent events made by male HCWs:

*“Before the conclusion of the visit, the father started to attack me verbally. He told me ‘I pay the taxes, I ask you to do everything, I do not go out until the child has a diagnosis’. After reiterating that it is not possible to perform this exam in an emergency room, the father threatened me and the nurse verbally, repeatedly”* (medical doctor, aged 40-49 years, 6-15 years of experience)

*“I phoned the patient’s son to inform him of the imminent discharge of his father. I was insulted with elevated tone repeatedly. It was impossible to manage communication; I did not reply in any way to the insults”* (nurse, 6-15 years of experience)



1  
2  
3        *“The patient’s husband accused me and my colleague of not respecting the numbering in the*  
4        *call for assistance. The colleague explained to him that there is a work plan, but he verbally*  
5        *attacked us”* (nurse, aged  $\geq 50$  years, 16-25 years of experience)  
6  
7

8  
9        Classes IV and V were labelled *Corporeal assault*. The words characterizing these  
10       classes were related to physical violent behaviours – such as hitting and throwing objects –  
11       which HCWs experienced principally in the psychiatric ward. Below are some examples of  
12       sentences from administrative records:  
13  
14

15  
16        *“While my colleague and I were preparing a medication, we were interrupted by the noise of*  
17        *shots coming from the kitchen door. Then, we were reached for and assaulted by the patient”*  
18        (nurse, aged  $>50$  years, 6-15 years of experience)  
19  
20

21        *“An agitated patient – for no apparent reason – pushed a cart against the entrance door to*  
22        *break through. He was shunted out, and then he came back and threatened to break our arms”*  
23        (administrative staff, aged 40-49 years, 16-25 years of experience)  
24  
25  
26  
27  
28  
29  
30

## 31 32 **DISCUSSION**

33  
34       The findings from the descriptive analysis showed some differences based on the HCW’s  
35       gender. Male HCWs aged  $< 30$  years did not report violent episodes that occurred in the  
36       workplace, while male HCWs with 6-15 years of experience reported more violent episodes  
37       than their female counterparts did. Among the HCW professions, nursing was the profession  
38       in which HCWs were more prone to experience a violent episode, confirming the results  
39       of [11]. Nevertheless, the findings showed that male medical doctors were more prone to  
40       report violent episodes than female medical doctors. Confirming the findings of Magnavita  
41       and Heponiemi [10], in this study, female HCWs experienced more verbal violence (insults)  
42       than male HCWs did, while male HCWs experienced more physical violence (bodily contact)  
43       than female HCWs did. Thus, our hypothesis was confirmed. An interesting finding concerns  
44       the perpetrator: female HCWs experienced a violent episode acted out by a patient’s relative  
45       more often than male HCWs did, and male HCWs experienced a violent episode acted out by  
46  
47  
48  
49  
50  
51  
52  
53  
54  
55  
56  
57  
58  
59  
60

1  
2  
3 a visitor more often than female HCWs did. Regarding the workplace, type of activity, and  
4 work shift, no statistically significant difference between genders emerged. This finding did  
5 not confirm the results of Magnavita and Heponiemi [10], as in this study, it was not found  
6 that male HCWs experienced workplace violence in wards more often than female HCWs did.  
7  
8  
9

10  
11  
12 Text analyses showed that female and male HCWs reported violent episodes in  
13 different ways. The findings from the text analysis of female HCWs identified a contextual  
14 factor for the violent episodes that occurred principally in those who were working in  
15 emergency rooms and wards. This contextual factor is the waiting time, a condition in which  
16 a patient and a patient's relative – as suggested by Schablon and colleagues [14] – could  
17 experience anxiety, confusion, and fear. Moreover, female HCWs (in particular, midwives)  
18 describe the violent episodes that occurred in the psychiatric ward as a consequence of a  
19 mental health disorder and noted that the assault was unpredictable. Thus, it seems that female  
20 HCWs perceive dealing with violence as part of their role [49]. Male HCWs use different  
21 words to describe violent episodes. They, more often than female HCWs, described the  
22 episodes including the witness of the episode, namely, colleagues. Male HCWs described  
23 episodes that occurred in the emergency room and ward (verbal violence) and in the  
24 psychiatric ward (corporeal assault) in the same way that female HCWs did. These episodes  
25 were related more to the type of profession than to the gender of the HCWs. The other  
26 illustrative variables (age and years of experience) did not have an effect on the differences  
27 between how male and female HCWs experience violent episodes.  
28  
29  
30  
31  
32  
33  
34  
35  
36  
37  
38  
39  
40  
41  
42  
43  
44  
45  
46  
47  
48

49 This study has strengths and limitations. Regarding strengths, in this study,  
50 administrative records in which HCWs experienced violent episodes were used. Usually, self-  
51 administered questionnaires are utilized to collect data about workplace violence. However,  
52 self-assessment could be affected by recall bias [50]; thus, this method does not solve the  
53 problem of overreporting or underreporting: a long study period could also influence the  
54  
55  
56  
57  
58  
59  
60

1  
2  
3 victim's memory. The analysis of reports completed within 72 hours of the aggression permits  
4 the retrieval of important information about the episode. Moreover, in this study, a qualitative  
5 analysis was used to identify differences between genders in reporting these episodes.  
6  
7

8  
9  
10 According to Griffiths and Schabracq [51], the majority of studies in work and health  
11 psychology and investigations on workplace violence utilize a quantitative approach: this  
12 choice stems from the fact that this method allows large numbers of subjects to complete  
13 standardized questionnaires. Otherwise, a qualitative approach permits the gathering of the  
14 complexity and nuances of individual experiences and reveals the range of ways in which  
15 common features operate in experiences of workplace violence [52]. Indeed, this method was  
16 useful to better understand the lexicon that characterized the victimization experienced by  
17 female and male HCWs.  
18  
19  
20  
21  
22  
23  
24  
25  
26  
27

28 This study also has weaknesses. First, because HCWs decided whether to report violent  
29 episodes, the results cannot be generalized and should be taken with caution. Thus, it was not  
30 possible to overcome the bias in reporting violence, as HCWs may be more likely to report  
31 serious events and exclude less serious ones [53]. Future research should explore, in a more  
32 comprehensive way, this phenomenon within health organizations. For example, interviews  
33 and focus group discussion techniques could be used to better understand the obtained results  
34 and how to promote the reporting of all violent behaviour, not only the most serious events: as  
35 recommended by the Italian Ministry of Health [32], a better comprehension of workplace  
36 violence could be useful to prevent it. Another limitation is in the procedure adopted:  
37 administrative records had different styles of reports, which we tried to make homogeneous  
38 through a classification procedure. This process included a subjective component, which must  
39 be considered in any narrative analysis [54]. The use of a mixed-method technique could  
40 permit the description of the phenomenon by a quantitative and qualitative approach. Future  
41  
42  
43  
44  
45  
46  
47  
48  
49  
50  
51  
52  
53  
54  
55  
56  
57  
58  
59  
60

1  
2  
3 research could use this technique to expand the scope and improve the analytic power of  
4  
5 studies on workplace violence in the healthcare sector [55].  
6

## 7 **CONCLUSIONS**

8  
9  
10 Overall, the findings from this explorative study suggest that there is a gender difference not  
11  
12 only in the characteristics of workplace violence perpetrated by patients, patients' relatives  
13  
14 and visitors but also in the way in which these episodes are described. Consequently, as noted  
15  
16 by Lawoko and colleagues [14] and Chen and colleagues [10], it is important in informative  
17  
18 and preventive courses to consider gender differences in experiencing a violent episode. For  
19  
20 female HCWs, it could be useful to provide clear messages that the acceptance of such  
21  
22 violence is not "part of the job" [27,56], explaining that anger should not be taken as an  
23  
24 acceptable emotion in the healthcare environment and that exposure to verbal violence should  
25  
26 not be accepted as a hazard of the profession [57]. For male HCWs, it could be useful to  
27  
28 reflect on feelings related to the stigma of victimization and to stress that a witness is not  
29  
30 necessary to corroborate a male HCW's version of the event. This finding could be analysed  
31  
32 in greater depth through an investigation that involves witnesses of the violent episodes  
33  
34 describing the episodes from their points of view: a follow-up study could include interviews  
35  
36 with staff on gender differences in the long-term impact of these events.  
37  
38  
39

40  
41  
42 Moreover, these findings could be utilized by health organization management to better  
43  
44 organize the security arrangements in some departments, to manage the overload of the  
45  
46 emergency room and to increase the use of safety devices.  
47  
48

49  
50 In conclusion, the findings could be used by health organization management to  
51  
52 improve individual measures, such as intervention programmes, counselling, and  
53  
54 psychological help, to reflect on victimization experiences and the way in which female and  
55  
56 male HCWs react to and cope with workplace violence.  
57  
58  
59  
60

1  
2  
3 **Acknowledgements.** The authors thank Ms. Daniela Cosentino and Mr. Andrea Caputo (M.S.  
4 in Psychology) for their assistance in the transcription of the administrative records.  
5  
6

7 **Competing interests statement.** We declare that we have no significant competing financial,  
8 professional, or personal interests that might have influenced the performance or presentation  
9 of the work described in this manuscript.  
10  
11  
12

13 **Funding statement.** This research received no specific grant from any funding agency in the  
14 public, commercial or not-for-profit sectors.  
15  
16  
17

18 **Ethical approval.** The Local Ethics Committee (Comitato di Bioetica dell'Ateneo, University  
19 of Torino) approved the research project in January 17, 2019 (Prot. 19468).  
20  
21  
22

23 **Author Contributions.** Conceptualization: D.A.M., C.G.C. and M.G.; methodology:  
24 D.A.M.; investigation: D.A.M., P.P., F.G. and M.G.; data analysis: D.A.M.; writing (original  
25 draft preparation): D.A.M. and C.G.C.; writing (review and editing): D.A.M., C.G.C. and  
26 M.G.  
27  
28  
29  
30  
31  
32  
33  
34

## 35 REFERENCES

- 36  
37 1 WHO. Violence: a public health priority. Geneva: World Health Organization 1995.  
38  
39 2 Cooper CL, Swanson N. Workplace violence in the health sector. State of the art. Geneva:  
40 Organización Internacional de Trabajo, Organización Mundial de la Salud, Consejo  
41 Internacional de Enfermeras Internacional de Servicios Públicos 2002.  
42  
43  
44  
45 3 Phillips JP. Workplace violence against health care workers in the United States. *New*  
46 *England journal of medicine* 2016;374(17):1661-1669. doi:10.1056/NEJMra1501998  
47  
48  
49  
50 4 Sun P, Zhang X, Sun Y, Ma H, Jiao M, Xing K, Kang Z, et al. Workplace violence against  
51 health care workers in North Chinese hospitals: a cross-sectional survey. *Int. J.*  
52 *Environ. Res. Public Health* 2017;14(1):96. doi:10.3390/ijerph14010096  
53  
54  
55  
56 5 Elliott PP. Violence in healthcare. *Nurs Manage* 1997:38-41.  
57  
58  
59  
60

- 1  
2  
3 6 Grottoli E, Ciriello S, Gabriele M, Giudice A, Lilli M, Mammi F, Quaranta D, Roccia K,  
4  
5 Spadone F, Magnavita N. Assaults and nuisances in health care environment. *Giornale*  
6  
7 *italiano di medicina del lavoro ed ergonomia* 2007;29(3):653-5.  
8  
9
- 10 7 Iozzino L, Ferrari C, Large M, Nielssen O, De Girolamo G. Prevalence and risk factors of  
11  
12 violence by psychiatric acute inpatients: a systematic review and meta-analysis. *PloS*  
13  
14 *one* 2015;10(6):e0128536. doi:10.1371/journal.pone.0128536  
15  
16
- 17 8 Arnetz JE, Hamblin L, Essenmacher L, Upfal MJ, Ager J, Luborsky M. Understanding  
18  
19 patient-to-worker violence in hospitals: a qualitative analysis of documented incident  
20  
21 reports. *J Adv Nurs* 2015;71(2):338-48. doi:10.1111/jan.12494  
22  
23
- 24 9 Kim SC, Ideker K, Todicheeny-Mannes D. Usefulness of aggressive behaviour risk  
25  
26 assessment tool for prospectively identifying violent patients in medical and surgical  
27  
28 units. *J Adv Nurs* 2012;68(2):349-57. doi: 10.1111/j.1365-2648.2011.05744.x  
29  
30
- 31 10 Magnavita N, Heponiemi T. Violence towards health care workers in a Public Health Care  
32  
33 Facility in Italy: a repeated cross-sectional study. *BMC Health Serv*  
34  
35 *Res* 2012;12(1):108. doi:10.1186/1472-6963-12-108  
36  
37
- 38 11 Renwick L, Lavelle M, James K, Stewart D, Richardson M, Bowers L. The physical and  
39  
40 mental health of acute psychiatric ward staff, and its relationship to experience of  
41  
42 physical violence. *International journal of mental health nursing* 2019;28(1):268-77.  
43  
44 doi: 10.1111/inm.12530  
45  
46
- 47 12 Hahn S, Hantikainen V, Needham I, Kok G, Dassen T, Halfens RJG. Patient and visitor  
48  
49 violence in the general hospital, occurrence, staff interventions and consequences: a  
50  
51 cross-sectional survey. *J Adv Nurs* 2012;68(12):2685-2699.  
52  
53
- 54 13 Ahmad M, Al-Rimawi R, Masadeh A, Atoum M. Workplace violence by patients and their  
55  
56 families against nurses: Literature review. *Int J Nurs Health Sci* 2015;2(4):46-55.  
57  
58  
59  
60

- 1  
2  
3 14 Lawoko, S, Soares, JJ, Nolan P. Violence towards psychiatric staff: A comparison of  
4  
5 gender, job and environmental characteristics in England and Sweden. *Work*  
6  
7 *Stress* 2004;18(1):39-55. doi: 10.1080/02678370410001710337  
8  
9
- 10 15 Schablon A, Wendeler D, Kozak A, Nienhaus A, Steinke S. Prevalence and Consequences  
11  
12 of Aggression and Violence towards Nursing and Care Staff in Germany—A Survey.  
13  
14 *Int J Environ Res Public Health* 2018;15(6):1274. doi:10.3390/ijerph15061274  
15  
16
- 17 16 Maguire BJ, O'Meara P, O'Neill BJ, Brightwell R. Violence against emergency medical  
18  
19 services personnel: A systematic review of the literature. *American journal of*  
20  
21 *industrial medicine* 2018;61(2):167-80. doi: 10.1002/ajim.22797  
22  
23
- 24 17 Italian Ministry of Health. Personale delle A.S.L. e degli istituti di cura  
25  
26 pubblici. [www.salute.gov.it/imgs/C\\_17\\_pubblicazioni\\_2161\\_allegato.pdf](http://www.salute.gov.it/imgs/C_17_pubblicazioni_2161_allegato.pdf)  
27
- 28 18 Morganson, VJ, Brown SE. Gender and Sexualized Aggression in the Workplace. In:  
29  
30 Nadler JY, Lowery MR, eds. *The War on Women in the United States: Beliefs,*  
31  
32 *Tactics, and the Best Defenses.* Praeger Publishing 2018:2051.  
33  
34
- 35 19 Chen C, Smith PM, Mustard C. Gender differences in injuries attributed to workplace  
36  
37 violence in Ontario 2002–2015. *Occup Environ Med* 2019;76(1):3-9.  
38  
39 doi:10.1136/oemed-2018-105152  
40  
41
- 42 20 Itzhaki M, Peles-Bortz A, Kostistky H, Barnoy D, Filshinsky V, Bluvstein I. Exposure of  
43  
44 mental health nurses to violence associated with job stress, life satisfaction, staff  
45  
46 resilience, and post-traumatic growth. *Int J Ment Health Nurs* 2015;24(5):403-412.  
47  
48 doi.org/10.3389/fpsy.2018.00059  
49  
50
- 51 21 Hampton D, Rayens MK. Impact of psychological empowerment on workplace bullying  
52  
53 and intent to leave. *JONA: The Journal of Nursing Administration.* 2019;49(4):179-  
54  
55 85. doi: 10.1097/NNA.0000000000000735  
56  
57  
58  
59  
60



- 1  
2  
3 22 Laeeque SH, Bilal A, Babar S, Khan Z, Ul Rahman S. How patient-perpetrated workplace  
4  
5 violence leads to turnover intention among nurses: The mediating mechanism of  
6  
7 occupational stress and burnout. *Journal of Aggression, Maltreatment & Trauma*  
8  
9 2018;27(1):96-118.doi:10.1080/10926771.2017.1410751  
11
- 12 23 Kim H, Kim JS, Choe K, Kwak Y, Song JS. Mediating effects of workplace violence on  
13  
14 the relationships between emotional labour and burnout among clinical nurses.  
15  
16 *Journal of advanced nursing* 2018;74(10):2331-9.doi: 10.1111/jan.13731  
17  
18
- 19 24 Findorff MJ, McGovern PM, Wall MM, Gerberich SG. Reporting violence to a health care  
20  
21 employer: a cross-sectional study. *AAOHN journal* 2005;53(9):399-406.  
22  
23 doi:10.1177/216507990505300906  
24  
25
- 26 25 Gillespie GL, Leming-Lee TS, Crutcher T, Mattei J. Chart It to Stop It. *J Nur Care Qual*  
27  
28 2016;31(3):254-61. doi:10.1097/NCQ.000000000000172  
29  
30
- 31 26 Clements PT, DeRanieri JT, Clark K, Manno MS, Kuhn DW. Workplace violence and  
32  
33 corporate policy for health care settings. *Nur Econ* 2005;23(3):119-124.  
34  
35
- 36 27 Kennedy MP. Violence in emergency departments: under-reported, unconstrained, and  
37  
38 unconscionable. *Med J Aust* 2005;183(7):362-365. doi:10.5694/j.1326-  
39  
40 5377.2005.tb07084.x  
41
- 42 28 Chen C, Smith PM, Mustard C. Gender differences in injuries attributed to workplace  
43  
44 violence in Ontario 2002–2015. *Occup Environ Med* 2019;76(1):3-9.  
45  
46 doi:10.1136/oemed-2018-105152  
47  
48
- 49 29 Eurofound. Fifth European Working Conditions Survey. Publication Office of the  
50  
51 European Union. Luxembourg, 2012. Available at  
52  
53 [https://www.eurofound.europa.eu/it/publications/report/2012/working-](https://www.eurofound.europa.eu/it/publications/report/2012/working-conditions/fifth-european-working-conditions-survey-overview-report)  
54  
55 [conditions/fifth-european-working-conditions-survey-overview-report](https://www.eurofound.europa.eu/it/publications/report/2012/working-conditions/fifth-european-working-conditions-survey-overview-report)  
56  
57  
58  
59  
60



- 1  
2  
3 30 Istat. Il disagio nelle relazioni lavorative. Istat 2010. Available at  
4  
5 <https://www.istat.it/it/archivio/5191>  
6  
7  
8 31 Inail. Violenza, aggressione e non solo. Dati Inail 2018. Available at  
9  
10 <https://www.inail.it/cs/internet/docs/alg-dati-inail-2018-novembre.pdf>  
11  
12 32 Ministero della Salute. Raccomandazione per prevenire gli atti di violenza a danno degli  
13  
14 operatori sanitari. Raccomandazione n. 8, novembre 2007.  
15  
16 [http://www.salute.gov.it/portale/documentazione/p6\\_2\\_2\\_1.jsp?id=721](http://www.salute.gov.it/portale/documentazione/p6_2_2_1.jsp?id=721)  
17  
18 33 Hopkins L, Taylor L, Bowen E, Wood C. A qualitative study investigating adolescents'  
19  
20 understanding of aggression, bullying and violence. *Child Youth Serv Rev*  
21  
22 2013;35(4):685-93. doi:10.1016/j.chilyouth.2013.01.012  
23  
24  
25 34 Patton MQ. Qualitative research and evaluation methods. Thousand Oaks, CA: Sage  
26  
27 2002:339-427.  
28  
29  
30 35 Ritchie J, Lewis J, Nicholls CM, Ormston R, eds. Qualitative research practice: A guide  
31  
32 for social science students and researchers. Thousand Oaks, CA: Sage 2013.  
33  
34 36 Fetters MD, Curry LA, Creswell JW. Achieving integration in mixed methods designs—  
35  
36 principles and practices. *Health Serv Res* 2013;48:2134-56. doi:10.1111/1475-  
37  
38 6773.12117  
39  
40  
41 37 Ramacciati N, Ceccagnoli A, Addey B, Rasero L. Violence towards emergency nurses.  
42  
43 The Italian national survey 2016: A qualitative study. *Int J Nurs Stud* 2018;81:21-29.  
44  
45 doi:10.1016/j.ijnurstu.20  
46  
47  
48 38 Shahzad A, Malik RK. Workplace Violence: An Extensive Issue for Nurses in Pakistan—  
49  
50 A Qualitative Investigation. *J Interpers Violence* 2014;29,11:2021-2034.  
51  
52 doi:10.1177/088626051351600518.01.017  
53  
54  
55 39 Pattani R, Ginsburg S, Johnson AM, Moore JE, Jassemi S, Straus SE. Organizational  
56  
57 factors contributing to incivility at an academic medical center and systems-based  
58  
59  
60

- 1  
2  
3 solutions: a qualitative study. *Academic Medicine* 2018;93(10):1569.doi:  
4  
5 10.1097/ACM.0000000000002310  
6  
7  
8 40 Arnetz J, Hamblin LE, Sudan S, Arnetz B. Organizational determinants of workplace  
9  
10 violence against hospital workers. *Journal of occupational and environmental*  
11  
12 *medicine* 2018;60(8):693.doi: 10.1097/JOM.0000000000001345  
13  
14  
15 41 Tucker AL, Spear SJ. Operational failures and interruptions in hospital nursing. *Health*  
16  
17 *Serv Res* 2006; 41(3p1):643-662. doi:10.1111/j.1475-6773.2006.00502.x  
18  
19  
20 42 Agresti A. *Categorical Data Analysis* (3<sup>rd</sup> ed.). Hoboken, New Jersey: John Wiley & Sons  
21  
22 Inc. 2002:267-313.  
23  
24 43 Matteucci MC, Tomasetto C. Alceste: un software per l'analisi dei dati testuali. In: Mazzara  
25  
26 BM, ed. *Metodi qualitativi in psicologia sociale*. Roma: Carocci 2002:305-27.  
27  
28  
29 44 Riff D, Lacy S, Fico F. *Analyzing media messages: Using quantitative content analysis in*  
30  
31 *research*. New York: Routledge. 2014. doi:10.4324/9780203551691  
32  
33  
34 45 Reinert M. Un logiciel d'analyse lexicale. *Cahiers de l'analyse des données* 1986;11(4):471-  
35  
36 81.  
37  
38 46 Reinert, M. Mondes lexicaux et topoi dans l'approche de Alceste. [Lexical worlds and topoi  
39  
40 in Alceste approach] In: S. Mellet & M. Vuillome, eds. *Mots chiffrés et déchiffrés*  
41  
42 [Coded and decoded words]. Paris, France: Honoré Champion Editeur 1998:289-303.  
43  
44  
45 47 Annese S, Mininni G. La focus group discussion tra analisi del contenuto e analisi del  
46  
47 discorso. In Mazzara BM, ed. *Metodi qualitativi in psicologia sociale*. Roma: Carocci  
48  
49 2002:125-48.  
50  
51  
52 48 Burla L, Knierim B, Barth J, Liewald K, Duetz M, Abel T. From text to codings: intercoder  
53  
54 reliability assessment in qualitative content analysis. *Nurs Res* 2008;57(2):113-7. doi:  
55  
56  
57 49 Brockmann, M. New perspectives on violence in social care. *Journal of Social*  
58  
59 *Work* 2002;2(1):29-44. doi:10.1177/146801730200200103  
60

- 1  
2  
3 50 Brophy, J. T., Keith, M. M., & Hurley, M. (2018). Assaulted and unheard: violence against  
4  
5 healthcare staff. *New solutions: a journal of environmental and occupational health*  
6  
7 *policy*, 27(4), 581-606.  
8  
9
- 10 51 Griffiths A, Schabracq MJ. Work and health psychology as a scientific discipline: Facing  
11  
12 the limits of the natural science paradigm. In: Schabracq MJ, Winnubst JAM, Cooper  
13  
14 CL, eds. *The handbook of work and health psychology*. New York: Wiley 2003:173-  
15  
16 189.  
17  
18
- 19 52 Coyle A. Introduction to qualitative psychological research. In: Lyons E, Coyle A, eds.  
20  
21 *Analysing qualitative data in psychology*. Thousand Oaks, CA: Sage Publications  
22  
23 2007:9-29. doi:10.4135/9781446207536.d7  
24  
25
- 26 53 Findorff MJ, McGovern PM, Wall MM, Gerberich SG. Reporting violence to a health care  
27  
28 employer: a cross-sectional study. *AAOHN Journal* 2005;53(9):399-406.  
29  
30
- 31 54 Amaratunga D, Baldry D, Sarshar M, Newton R. Quantitative and qualitative research in  
32  
33 the built environment: application of “mixed” research approach. *Work*  
34  
35 *study* 2002;51(1):17-31. doi:10.1108/00438020210415488  
36  
37
- 38 55 Sandelowski M. Combining qualitative and quantitative sampling, data collection, and  
39  
40 analysis techniques in mixed-method studies. *Res Nurs & Health* 2000;23(3):246-255.  
41  
42 doi:10.1002/1098240X(200006)23:3<246::AID-NUR9>3.0.CO;2-H  
43  
44
- 45 56 Potera C. Violence against nurses in the workplace. *Am J Nurs* 2016;116(6):20-21.  
46  
47 doi:10.1097/01.NAJ.0000484226.30177.ab  
48
- 49 57 Duxbury, J., & Whittington, R. (2005). Causes and management of patient aggression and  
50  
51 violence: staff and patient perspectives. *Journal of advanced nursing*, 50(5), 469-478.  
52  
53  
54  
55

56 Figure legends:  
57  
58  
59  
60

1  
2  
3 Figure 1. *Text corpus of administrative records compiled by female HCW victims of*  
4 *workplace violence. Dendrogram of stable classes: Class I was labelled Waiting time, and*  
5  
6 *Class II was labelled Physical attack.*  
7  
8  
9

10 Figure 2. *Text corpus of administrative records compiled by male HCW victims of*  
11 *workplace violence. Dendrogram of stable classes: Classes I, II and III were labelled Verbal*  
12 *violence. Classes IV and V were labelled Corporeal assault.*  
13  
14  
15  
16  
17  
18  
19  
20  
21  
22  
23  
24  
25  
26  
27  
28  
29  
30  
31  
32  
33  
34  
35  
36  
37  
38  
39  
40  
41  
42  
43  
44  
45  
46  
47  
48  
49  
50  
51  
52  
53  
54  
55  
56  
57  
58  
59  
60

For peer review only

1  
2  
3 Figure 1. *Text corpus of administrative records compiled by female HCWs victims of*  
4 *workplace violence. Dendrogram of stable classes: Class I was labelled Waiting time, Class II was*  
5  
6 *labelled Physical attack.*  
7  
8  
9

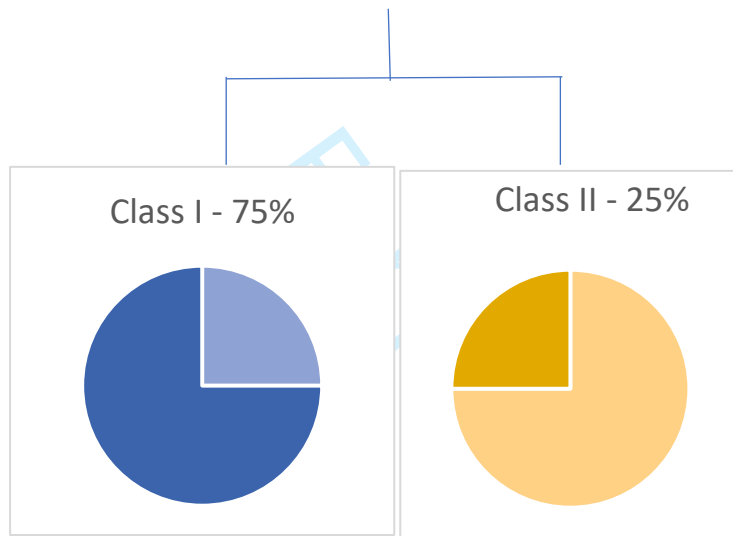

1  
2  
3  
4  
5  
6  
7  
8  
9  
10  
11  
12  
13  
14  
15  
16  
17  
18  
19  
20  
21  
22  
23  
24  
25  
26  
27  
28  
29  
30  
31  
32  
33  
34  
35  
36  
37  
38  
39  
40  
41  
42  
43  
44  
45  
46

Figure 2. Text corpus of administrative records compiled by male HCWs victims of workplace violence. Dendrogram of stable classes: Classes I, II and III were labelled Verbal violence. Classes IV and V were labelled Corporeal assault.

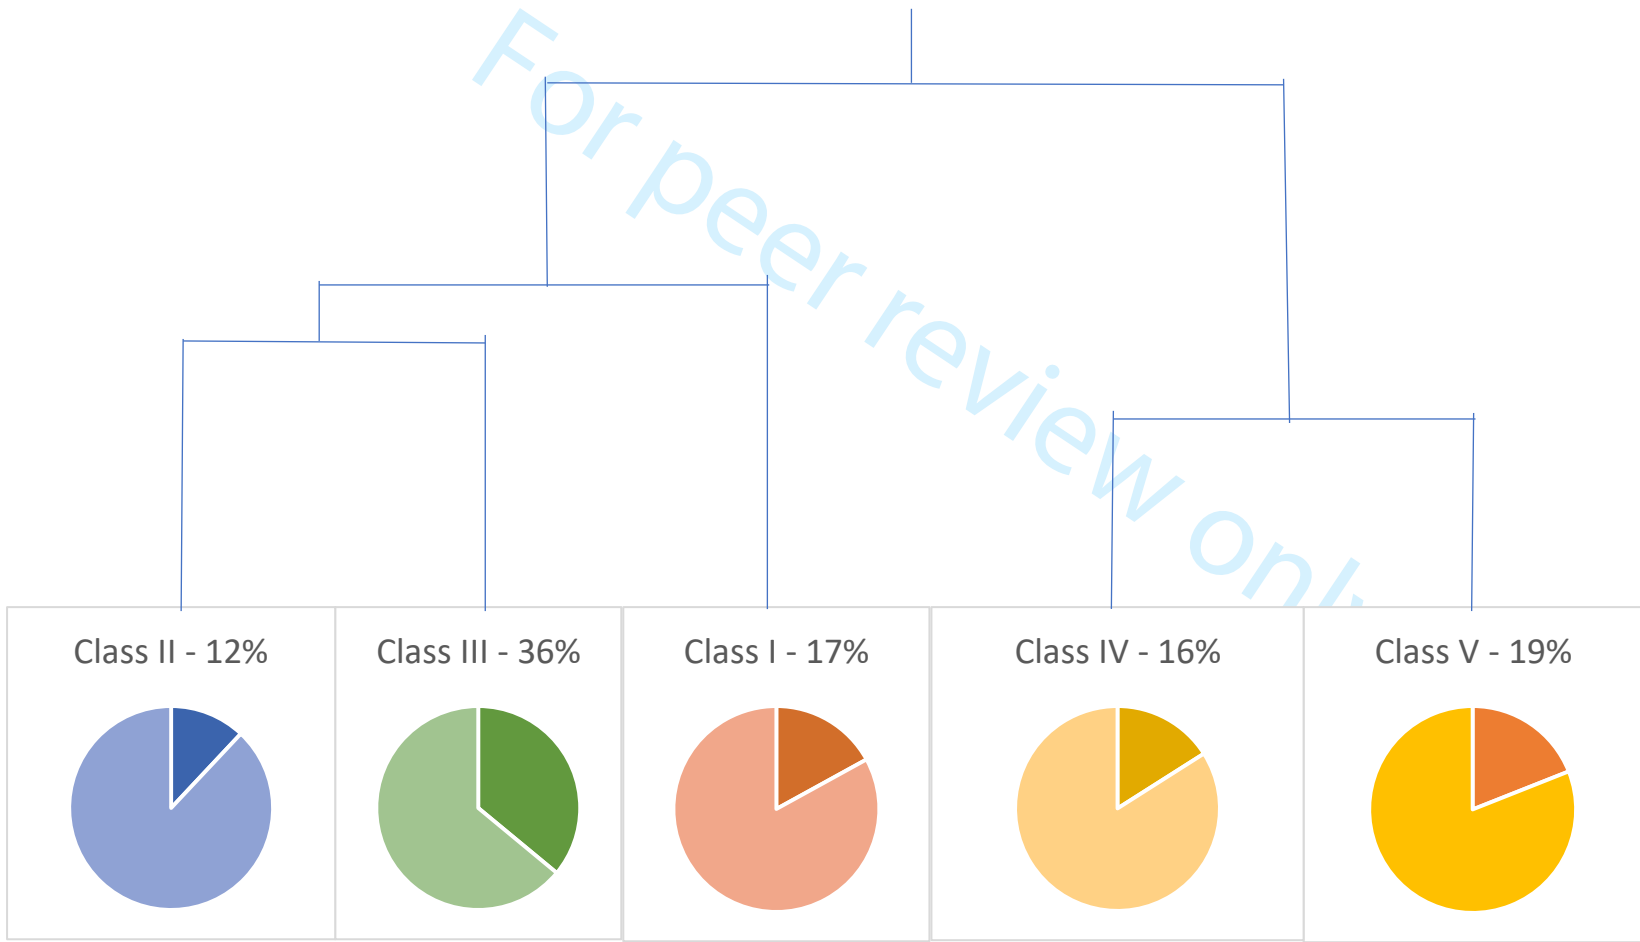

# BMJ Open

## Gender differences in reporting workplace violence: A qualitative analysis of administrative records of violent episodes experienced by healthcare workers in a large public Italian hospital

|                                 |                                                                                                                                                                                                                                                                                                                                                                                                                                                                              |
|---------------------------------|------------------------------------------------------------------------------------------------------------------------------------------------------------------------------------------------------------------------------------------------------------------------------------------------------------------------------------------------------------------------------------------------------------------------------------------------------------------------------|
| Journal:                        | <i>BMJ Open</i>                                                                                                                                                                                                                                                                                                                                                                                                                                                              |
| Manuscript ID                   | bmjopen-2019-031546.R2                                                                                                                                                                                                                                                                                                                                                                                                                                                       |
| Article Type:                   | Original research                                                                                                                                                                                                                                                                                                                                                                                                                                                            |
| Date Submitted by the Author:   | 12-Oct-2019                                                                                                                                                                                                                                                                                                                                                                                                                                                                  |
| Complete List of Authors:       | Acquadro Maran, Daniela; University of Turin, Department of Psychology<br>Cortese, Claudio Giovanni; University of Turin, Department of Psychology<br>PAVANELLI, Pierluigi ; Azienda Ospedaliero Universitaria Città della<br>Salute e della Scienza di Torino<br>Fornero, Giulio ; Azienda Ospedaliero Universitaria Città della Salute e<br>della Scienza di Torino<br>Gianino, Maria Michela; University of Turin, Department of Public Health<br>Sciences and Pediatrics |
| <b>Primary Subject Heading</b>: | Medical management                                                                                                                                                                                                                                                                                                                                                                                                                                                           |
| Secondary Subject Heading:      | Qualitative research                                                                                                                                                                                                                                                                                                                                                                                                                                                         |
| Keywords:                       | Human resource management < HEALTH SERVICES ADMINISTRATION & MANAGEMENT, healthcare workers, workplace violence, qualitative analysis, gender difference, Health & safety < HEALTH SERVICES ADMINISTRATION & MANAGEMENT                                                                                                                                                                                                                                                      |
|                                 |                                                                                                                                                                                                                                                                                                                                                                                                                                                                              |

SCHOLARONE™  
Manuscripts

1  
2  
3 **Gender differences in reporting workplace violence:**  
4

5 **A qualitative analysis of administrative records of violent episodes experienced by**  
6  
7 **healthcare workers in a large public Italian hospital**  
8  
9

10 ACQUADRO MARAN Daniela<sup>1</sup>, CORTESE Claudio Giovanni<sup>1</sup>, PAVANELLI Pierluigi<sup>2</sup>,  
11  
12 FORNERO Giulio<sup>2</sup>, GIANINO Maria Michela<sup>3</sup>  
13  
14

15  
16  
17 <sup>1</sup> Department of Psychology, University of Turin, Turin, Italy  
18

19 <sup>2</sup> AOU Città della salute e della Scienza Teaching Hospital, Turin, Italy  
20

21 <sup>3</sup> Department of Public Health Sciences and Pediatrics, University of Turin, Italy  
22  
23

24  
25  
26 *Corresponding author (c. a.):* Claudio Giovanni CORTESE, Phd, Full Professor, Department  
27  
28 of Psychology, University of Turin, Via Verdi 10, Turin, Italy. E-mail:  
29  
30 claudio.cortese@unito.it, phone +39 011. 6702040  
31  
32

33  
34  
35 - Daniela ACQUADRO MARAN, Phd, Assistant Professor, Department of Psychology,  
36  
37 University of Turin, Turin, Italy. E-mail: daniela.acquadro@unito.it  
38

39  
40 - Claudio Giovanni CORTESE, Phd, Full Professor, Department of Psychology, University of  
41  
42 Turin, Turin, Italy. E-mail: claudio.cortese@unito.it  
43

44 - Pierluigi PAVANELLI, MD, Director, Security and Environment Unit (S.P.P.), AOU Città  
45  
46 della salute e della Scienza Teaching Hospital, Turin, Italy. E-mail:  
47  
48 ppavanelli@cittadellasalute.to.it  
49

50  
51 - Giulio FORNERO, MD, Director, Quality and Safety of Care Paths Department, AOU Città  
52  
53 della salute e della Scienza Teaching Hospital, Turin, Italy. E-mail:  
54  
55 gfornero@cittadellasalute.to.it  
56  
57  
58  
59  
60



1  
2  
3 - Maria Michela GIANINO, Associate Professor, Department of Public Health Sciences and  
4  
5 Pediatrics, University of Turin, Turin, Italy. E-mail: mariola.gianino@unito.it  
6  
7

8  
9 Word count: 4857  
10  
11  
12  
13  
14  
15  
16  
17  
18  
19  
20  
21  
22  
23  
24  
25  
26  
27  
28  
29  
30  
31  
32  
33  
34  
35  
36  
37  
38  
39  
40  
41  
42  
43  
44  
45  
46  
47  
48  
49  
50  
51  
52  
53  
54  
55  
56  
57  
58  
59  
60

For peer review only

## Gender differences in reporting workplace violence:

### A qualitative analysis of administrative records of violent episodes experienced by healthcare workers in a large public Italian hospital

#### ABSTRACT

**Objectives:** This study aims to analyse, from a descriptive and qualitative point of view, the episodes of violence reported by healthcare workers (HCWs) in a large public Italian hospital. Qualitative analysis permits us to collect the victims' words used to describe the event and the ways in which they dealt with it. A comparison between genders was performed to better understand what type of different strategies could be used to improve the prevention of workplace violence for HCWs.

**Design and Setting:** The retrospective observational study was carried out in "Città della Salute e della Scienza", a complex of four interconnected hospitals situated in northern Italy. This study analysed aggression data from the four-year period of 2015-2018 that included all HCW categories. The data were obtained from the Aggression Reporting Form.

**Participants:** The analysed records were supplied by 396 HCWs (3.6% of all HCWs in the hospital).

**Results:** Male HCWs aged < 30 years did not report violent episodes that occurred in the workplace, while male HCWs with 6-15 years of work experience reported more violent episodes than their female counterparts. Among the HCW professions, nursing was the profession in which HCWs were more prone to experience a violent episode, while male medical doctors were more prone to report violent episodes than female medical doctors. Moreover, female HCWs experienced more verbal violence (insults) than male HCWs did, while male HCWs experienced more physical violence (bodily contact) than female HCWs did.

1  
2  
3 **Conclusions:** The findings from this explorative study suggest that there is a gender  
4 difference in the characteristics of workplace violence perpetrated by patients, patients'  
5 relatives and visitors and in the way in which these episodes are described. Consequently, it is  
6 important for informative and preventive courses to consider gender differences in  
7 experiencing a violent episode.  
8  
9

### 14 **Strengths and limitations of this study**

16 (Strength) A qualitative analysis was used to collect the victims' descriptions of workplace  
17 violence.  
18

19 (Strength) The method permits the capture of respondents' points of view.  
20

21 (Strength) The comparison between genders could be useful to improve the prevention of  
22 workplace violence in this population.  
23

24 (Limitation) It was not possible to overcome the bias in reporting violence.  
25

26 (Limitation) Unreported incidents could not be included in the study.  
27

28 **Keywords:** healthcare workers; workplace violence; qualitative analysis; gender difference;  
29 reported incidents.  
30  
31

### 32 **INTRODUCTION**

33 Workplace violence has been defined by the World Health Organization as "the intentional  
34 use of power, threatened or actual, against another person or against a group, in work-related  
35 circumstances, that either results in or has a high degree of likelihood of resulting in injury,  
36 death, psychological harm, maldevelopment, or deprivation"[1].  
37  
38

39 As noted by several investigations [2-4], the healthcare sector is at particular risk of  
40 workplace violence. Elliot [5] estimated that the risk of violence from patients and their  
41 relatives towards healthcare workers (HCWs) is 16 times higher than that towards other  
42 workers. This risk is highest for healthcare workers working in psychiatric wards and  
43  
44  
45  
46  
47  
48  
49  
50  
51  
52  
53  
54  
55  
56  
57  
58  
59  
60

1  
2  
3 emergency rooms [6-7] since they report more violent events than other HCWs, such as those  
4  
5 working in wards [8-10]. As suggested by Renwick and colleagues [11], it is possible that  
6  
7 subjects who work in other wards have biased their answers, presenting themselves as at less  
8  
9 risk than they are in reality because of such complex reasons as denial and social stigma of  
10  
11 reporting workplace violence. At the same time, working in wards with patients who are more  
12  
13 dangerous because they suffer from mental illness (psychiatric ward) or are under the  
14  
15 influence of drugs or alcohol (emergency room), may make workers who are victims of  
16  
17 violence feel more comfortable about reporting violent episodes.  
18  
19  
20

21  
22 Moreover, the risk of aggression is highest for HCWs working as nurses since they  
23  
24 report more violent episodes than do physicians and administrative staff [12]. A possible  
25  
26 explanation for this finding is linked with the nature of their job, as nurses have direct contact  
27  
28 with patients (who could be confused, frightened, or delirious) and their families/friends [13-  
29  
30 15]. In this case, a possible explanation could be found in the sample bias, since in the  
31  
32 literature about nurses being assaulted, respondents who had been assaulted would be  
33  
34 expected to have a higher rate of response than those who had not been assaulted [16].  
35  
36  
37

38  
39 Another possible explanation is linked to gender: in some countries, such as Italy, in  
40  
41 more than 70% of cases, nurses are female [17], and some studies have shown that female  
42  
43 workers are more often affected by violence than their male colleagues [18-19]. Gender is  
44  
45 also related to the type of violence experienced by HCWs; the investigation by Magnavita and  
46  
47 Heponiemi [10] showed that, in hospitals, female nurses experienced verbal violence (such as  
48  
49 yelling and screaming) more often than male nurses, who were more often victims of physical  
50  
51 assault (such as hitting and kicking). Moreover, the importance of investigating the gender  
52  
53 difference in workplace violence experienced by HCWs was noted by Lawoko and colleagues  
54  
55 [14]: “intervention/prevention measures need to review the gender and profession issue. It is  
56  
57 likely that men and women, psychiatrists and nurses may require different interventions  
58  
59  
60

1  
2  
3 related to their specific problems” (page 51). These types of violent episodes affect the  
4  
5 perceived wellbeing of HCWs and could lead to several consequences, such as the  
6  
7 interruption of work, medical treatment, and hospital and/or home care; psychological support  
8  
9 might be needed for the HCWs to cope with the event [20]. Workplace violence might also  
10  
11 lead staff to leave the profession [21].  
12  
13

14  
15 Furthermore, workplace violence in this sector could be related to turnover intention  
16  
17 through occupational stress first and then burnout [22]: regarding this, Kim and colleagues  
18  
19 [23] suggested that the prevention of workplace violence is one way of reducing burnout in  
20  
21 the healthcare sector.  
22  
23

24  
25 An interesting question concerns the reports made by HCWs regarding violent  
26  
27 episodes in the workplace. Findings from investigations have shown that violence, especially  
28  
29 verbal violence [2], in the healthcare sector is under-reported [24-25]. The under-reporting of  
30  
31 violence is not a phenomenon that involves only workplace violence. All forms of violence  
32  
33 (sexual harassment, domestic violence, school bullying, and so on) are under-reported for  
34  
35 different reasons, including both the stigma of victimization, such as shame, isolation, and  
36  
37 fear, and the threat of further violence, which often deter victims from reporting violent  
38  
39 episodes [26].  
40  
41

42  
43 Moreover, for HCWs, there is a risk of desensitization to violence, as violence – due to  
44  
45 contact with frail and ill people – is perceived as part of an HCW’s job [27]. Nevertheless, the  
46  
47 reporting of any act of violence is fundamental in engaging hospital management to activate  
48  
49 appropriate organizational responses. Indeed, the administrative records of violent episodes  
50  
51 experienced by HCWs constitute an important source of information [28] about the type of  
52  
53 violence (physical or verbal), the type of perpetrator (patient, relative, or visitor), the type of  
54  
55 HCW (administrator, midwife, nurse, or physician), the place in which the HCW experienced  
56  
57 the violence (psychiatric ward, emergency room, or ward) and the type of activity that she/he  
58  
59  
60

1  
2  
3 was doing (support activity for patients, professional team back-office activity, or assistance  
4 and patient care). These records permit the prevention of workplace violence, providing  
5 information about, for example, the type of training course that a particular HCW sub-  
6 population needs and/or the safety devices that should be installed in a particular ward.  
7  
8  
9

10  
11  
12 In Europe, the Fifth European Working Conditions Survey [29] shows that, on  
13 average, 14.9% of workers reported levels of subjection to adverse social behaviour, and the  
14 highest level was in the healthcare sector (23%). The overall percentage of reported levels of  
15 subjection to adverse social behaviour in Italian workers was 8%; in the healthcare sector, this  
16 percentage was 41.4% of the workers [30]. There were 1200 total violent behaviours reported  
17 by HWCs in 2018. In most cases, (70%), the victim was female, and the perpetrator was a  
18 patient, a patient's relative or a visitor [31]. To deal with this phenomenon, in 2007, the  
19 Italian Ministry of Health published Recommendation no. 8, "Preventing acts of violence  
20 against health workers". This recommendation had several goals. First, it oversees the  
21 reporting of incidents of violence using official sources, such as the judicial authority, the  
22 police forces and the National Workplace Accident Institute. Second, it promotes the  
23 collection of data through specific surveys to identify the frequency and severity of violent  
24 episodes. The results could be useful for adopting appropriate action from an organizational  
25 and structural point of view, for example, redesigning the space and/or reformulating  
26 procedures for access to the ward. Moreover, data could be used to improve the training  
27 courses that aim to prevent violence, to improve the coping strategies and to reduce the  
28 negative consequences [32].  
29  
30  
31  
32  
33  
34  
35  
36  
37  
38  
39  
40  
41  
42  
43  
44  
45  
46  
47  
48  
49  
50

51 This study aims to analyse, from a descriptive and qualitative point of view, the  
52 episodes of violence experienced by HCWs working in a large public Italian hospital. The  
53 qualitative analysis permits us to collect the victims' words used to describe the event and the  
54 ways in which they dealt with it [33]. The advantage offered by this method is that it allows  
55  
56  
57  
58  
59  
60

1  
2  
3 us to capture respondents' points of view without predetermining their answers [34-35]. This  
4  
5 approach is widely used in social science research [36] and has been used to investigate  
6  
7 HCWs' perceptions of physical and verbal aggression [8, 37-38]. It has also been used, for  
8  
9 example, to investigate the descriptions of violent behaviour provided by workers [39] and  
10  
11 perceptions of the organizational safety climate [40].  
12  
13

14  
15 A comparison between genders was used to better understand what type of  
16  
17 differences, if any, could be used to improve the prevention of workplace violence for HCWs.  
18  
19 Based on the literature review presented above, the hypothesis is that there are gender  
20  
21 differences in the violent episodes experienced by female and male HCWs: female HCWs  
22  
23 experience more verbal violence than their male colleagues, and male HCWs experience more  
24  
25 physical violence than their female colleagues. Moreover, from the analysis of the episodes,  
26  
27 as described by female and male HCWs, we expected that the observed semantic differences  
28  
29 characterized the experience of victimization. This is the novel contribution of this work. We  
30  
31 do not have specific hypotheses about the relationship between gender and the lexical words  
32  
33 used to define the violent episodes; therefore, we intend to analyse this relationship from an  
34  
35 explorative perspective.  
36  
37  
38

## 39 40 **METHOD**

41  
42 The retrospective observational study was carried out in Città della Salute e della Scienza  
43  
44 (City of Health and Science University Hub), a complex of four interconnected hospitals  
45  
46 situated in northern Italy. It has 1917 ordinary hospital beds and more than 400 day hospital  
47  
48 and day surgery beds, and it is one of the largest national and European health hubs, boasting  
49  
50 approximately twelve thousand employees. This study analysed aggression data from the  
51  
52 four-year period of 2015-2018 that included all worker categories. The data were obtained  
53  
54 from the Aggression Reporting Form adopted in 2014 in compliance with the  
55  
56 abovementioned recommendation of the Ministry of Health. The form is available on the  
57  
58  
59  
60

1  
2  
3 intranet portal, and all parts of the form must be completed by victims of assault within 72  
4  
5 hours of the event and sent to the Safety and Environment Office. Each administrative record  
6  
7 of a violent episode contains the following information: the sociodemographic data of the  
8  
9 victim (age, gender, years of experience, and profession), workplace in which the violent  
10  
11 episode occurred (psychiatric ward, emergency room or ward - 1 item), the type of activity  
12  
13 performed by the HCW at the moment of aggression (i.e., conversation), the HCW's shift at  
14  
15 the time of aggression, the type of aggressor (the perpetrator could be more than one person:  
16  
17 patient, patient's relative, or visitor – 3 items, yes/no answers), the misconduct (violent  
18  
19 behaviour could be of more than one type: insult, verbal threat, bodily contact, throwing  
20  
21 objects, or use of a weapon – 5 items, yes/no answers), the consequences (consequences could  
22  
23 be of more than one type: interruption of work, medical treatment, psychological support,  
24  
25 hospital care, home care, or no consequence – 5 items, yes/no answers), the possibility of  
26  
27 preventing the attack (1 item, yes/no answer), and the description of the event. Similar to  
28  
29 other investigations (see Magnavita and Heponiemi [10]), age was categorized as <30 years,  
30  
31 30-39 years, 40-49 years, and  $\geq 50$  years, and the years of experience were classified as  $\leq 5$   
32  
33 years, 6-15 years, 16-25 years, and  $> 25$  years (1 item each). The type of activity was  
34  
35 categorized as support activity for patients (e.g., meal preparation and administration),  
36  
37 professional team back-office activity (e.g., treatment prescriptions), and assistance and  
38  
39 patient care (e.g., assistance at the front desk) [41] (1 item). The profession was categorized as  
40  
41 midwife, nurse, medical doctor, administrative staff or technician (such as a radiologist) (1  
42  
43 item). The work shift in which the aggression occurred was categorized as morning (6:00-  
44  
45 12:00), afternoon (12:00-18:00), evening (18:00-24:00) or night (0:00-6:00) (1 item).  
46  
47  
48  
49  
50  
51  
52  
53

### 54 **Procedure**

55  
56 Data were analysed by the authors of this paper and by assistants trained by researchers. After  
57  
58 the approval of the Local Ethics Committee (Comitato di Bioetica dell'Ateneo, University of  
59  
60



1  
2  
3 Torino, Prot. 19468 January 17, 2019) was received, the administrative records of violent  
4  
5 episodes were consulted in January-February 2019. Records were transcribed in a database;  
6  
7 sensitive data (name, surname and worker's registration number) were omitted. This  
8  
9 procedure was in accordance with the code of ethics of the Italian Association of Professional  
10  
11 Psychologists and with Italian law concerning privacy. The files that constituted the corpus of  
12  
13 administrative records were saved in a folder. Overall, the sample contained 418 records. The  
14  
15 inclusion criteria for the episodes in this analysis were the record describing the case of  
16  
17 violence perpetrated by a patient, a relative or a visitor. Thus, 14 records were excluded  
18  
19 because the perpetrator was a colleague, a subordinate or a supervisor. Moreover, eight  
20  
21 records were excluded because the gender of the victim was omitted. Therefore, 396 records  
22  
23 were included in the present work.  
24  
25  
26  
27

### 28 **Data analysis**

29  
30 Descriptive statistics were calculated using IBM SPSS Statistics, version 24. Descriptive  
31  
32 measures (mean  $\pm$  SD) were calculated for all the continuous variables. Because of the  
33  
34 categorical nature of the data,  $\chi^2$  tests were used to examine gender differences, followed by  
35  
36 effect-size calculations (Phi and Cramer's V) to estimate the practical significance of the  
37  
38 differences. As a post hoc test, standardized Pearson residuals (from this point forward: SPRs)  
39  
40 were calculated for each cell to determine which cell differences contributed to the  $\chi^2$  test  
41  
42 results. SPRs with absolute values greater than 1.96 indicated that the number of cases in that  
43  
44 cell was significantly larger than would be expected (in terms of over- or underrepresentation)  
45  
46 if the null hypothesis were true, with a significance level of .05 [42].  
47  
48  
49

50  
51 As suggested by Matteucci and Tomasetto [43], content analysis was used to process  
52  
53 the written description of the violent episodes. Content analysis is defined as "the systematic  
54  
55 assignment of communication content to categories according to rules and the analysis of  
56  
57 relationships involving those categories using statistical methods" [44, p. 3]. These data were  
58  
59  
60

1  
2  
3 analysed using *Alceste 6.0* [45]. This software permits the analysis of written data according  
4 to a descending hierarchical classification (DHC) in which the text is divided into elementary  
5 context units and categorized into homogeneous classes. The software allows for the isolation  
6 and separation of internally homogeneous groups (or classes) within specific populations.  
7  
8 Classes are formed on the basis of the co-occurrence of forms and units of context [43]. The  
9 software uses symbols to indicate the type of root. If the word is followed by the symbol <,  
10 this indicates that only the root of the word is recognized (e.g., aggressi< denotes the words  
11 aggressive, aggression, and aggressively). The symbol + indicates the identification of the  
12 termination and of different forms with the same root (e.g., nurse+ indicates the words nurse  
13 and nurses). The first class that is formed will be the most homogeneous in terms of content,  
14 i.e., the one whose lexical universe (a specific vocabulary that is used and to which the  
15 speaker attributes relevant meaning) appears to differ from those of others. The software  
16 performs the  $\chi^2$  test on the association between words and classes to identify the specific  
17 vocabulary for each class. This step allows the researcher to identify the lexical worlds in the  
18 text, i.e., the “usual places” (conventional themes) of discourse [46]. The software allows for  
19 repeated segments to be highlighted, i.e., associations of the most frequent words in a class  
20 and related classes with the selected variables. These are called illustrative variables and carry  
21 further information about the textual corpus, allowing the researcher to identify the specific  
22 characteristics that define individuals who share the same semantic universe.  
23  
24  
25  
26  
27  
28  
29  
30  
31  
32  
33  
34  
35  
36  
37  
38  
39  
40  
41  
42  
43  
44  
45

46  
47 In this study, the findings from the descriptive analysis were used as illustrative  
48 variables for the text analysis. An example of an illustrative variable is \*midwife, which  
49 indicates the profession of the HCW who draws up the administrative record to report the  
50 violence experienced in the workplace. The resulting data were examined by three  
51 independent and autonomous subjects, as suggested by Annese and Mininni [47]. This phase  
52 was followed by a discussion of the meaning attributed to the data to reach an agreement on  
53  
54  
55  
56  
57  
58  
59  
60

1  
2  
3 the results. Consistency was guaranteed by reproducibility (or intercoder reliability -[48];  
4  
5 Cohen's  $k = .85$ ).  
6  
7

## 8 **Patient and public involvement**

9

10  
11 No patient involved.  
12  
13

## 14 **Data availability statement**

15

16  
17 No additional data available.  
18  
19

## 20 **RESULTS**

21  
22

### 23 **Descriptive analysis**

24  
25

26 Overall, the records were compiled by 396 HCWs (3.6% of all HCWs working in the  
27 hospital). A total of 302 HCWs (76.3%) were female, representing approximately 4% of the  
28 entire female HCW population; 94 (23.7%) were male, representing 3.1% of the entire male  
29 HCW population. Most of the HCWs were aged 40-49 years (146, 36.9%; 4.7% of the entire  
30 HCW population aged 40-49 years). Regarding years of experience, most HCWs were in the  
31 range of 6-15 years (181, 46.3%; 6.1% of the entire HCW population with 6-15 years of  
32 experience). Two hundred ninety-eight HCWs (76.2%) were nurses (26.6% of the entire nurse  
33 population), 53 (13.6%) were midwives (25.4% of the entire midwife population), 22 (5.6%)  
34 were medical doctors (1.2% of the entire medical doctor population), 15 (3.8%) were  
35 administrative staff (1.7% of the entire administrative staff population) and 3 (0.8%) were  
36 technicians (0.5% of the entire technician population). Table 1 presents the sociodemographic  
37 characteristics of the female and male HCWs who experienced violence.  
38  
39  
40  
41  
42  
43  
44  
45  
46  
47  
48  
49  
50  
51  
52

53  
54 Regarding the age of the victims, the findings showed a statistically significant  
55 difference between genders (Cramer's  $V = 0.16$ ). In particular, there were no male victims  
56 aged <30 years ( $|SPR| = -2.0$ ). Male HCWs with 6-15 years of experience referred more  
57  
58  
59  
60

frequently to episodes of violence ( $|SPR| = 1.7$ , Cramer's  $V = 0.16$ ) than did female HCWs. Moreover, male medical doctors referred more frequently to episodes of violence than did female doctors, and these episodes of violence occurred more frequently for male medical doctors ( $|SPR| = 2.5$ , Cramer's  $V = 0.18$ ). The perpetrator was a patient's relative for more female HCWs than male HCWs (52% and 37.2%, respectively,  $p = .012$ ), while the perpetrator was a visitor for more male HCWs than female HCWs (5.3% and 1.3%, respectively,  $p = .023$ ). Regarding consequences, home care was indicated by male HCWs, while female HCWs did not mention it.

Table 1. Sociodemographic characteristics of the female and male HCWs who experienced violence. The percentages (N = 396) are in brackets.

|                                            | Female<br><i>n</i> = 302 | Male<br><i>n</i> = 94 | $\chi^2$ | <i>p</i> |
|--------------------------------------------|--------------------------|-----------------------|----------|----------|
| Age:                                       |                          |                       | 9.45     | .024     |
| - <30 years                                | 17(5.7)                  | -                     |          |          |
| - 30-39 years                              | 83(27.9)                 | 18(19.4)              |          |          |
| - 40-49 years                              | 105(35.4)                | 41(44.1)              |          |          |
| - $\geq 50$ years                          | 92(31)                   | 34(36.6)              |          |          |
| Years of experience:                       |                          |                       | 10.24    | .017     |
| - $\leq 5$                                 | 44(14.8)                 | 6(6.5)                |          |          |
| - 6-15                                     | 128(43)                  | 53(57)                |          |          |
| - 16-25                                    | 80(26.8)                 | 27(29)                |          |          |
| - $> 25$                                   | 46(15.4)                 | 7(7.5)                |          |          |
| Profession:                                |                          |                       | 13.11    | .011     |
| - Midwife                                  | 39(13.1)                 | 14(15.1)              |          |          |
| - Nurse                                    | 236(79.2)                | 62(66.7)              |          |          |
| - Medical doctor                           | 11(3.7)                  | 11(11.8)              |          |          |
| - Administrative staff                     | 9(3)                     | 6(6.5)                |          |          |
| - Technician                               | 3(1)                     | -                     |          |          |
| Workplace:                                 |                          |                       | 4.38     | n.s.     |
| - Psychiatric ward                         | 35(38.5)                 | 84(28.3)              |          |          |
| - Emergency room                           | 104(35)                  | 23(25.3)              |          |          |
| - Ward                                     | 109(36.7)                | 33(36.3)              |          |          |
| Type of activity:                          |                          |                       | 3.61     | n.s.     |
| - Support activity for patient             | 125(45.8)                | 40(48.8)              |          |          |
| - Professional team's back-office activity | 77(28.2)                 | 15(18.3)              |          |          |
| - Assistance and patient care              | 71(26)                   | 27(32.9)              |          |          |
| Work shift:                                |                          |                       | 0.55     | n.s.     |
| - Morning                                  | 85(28.5)                 | 30(32.3)              |          |          |
| - Afternoon                                | 124(41.6)                | 36(38.7)              |          |          |
| - Evening                                  | 64(21.5)                 | 20(21.5)              |          |          |
| - Night                                    | 25(8.4)                  | 7(7.5)                |          |          |
| Perpetrator:                               |                          |                       |          |          |

|                                      |           |           |      |      |
|--------------------------------------|-----------|-----------|------|------|
| - Patient                            | 173(57.3) | 56(59.6)  | 0.15 | n.s. |
| - Patient's relative                 | 157(52)   | 35(37.2)  | 6.25 | .012 |
| - Visitor                            | 4(1.3)    | 5(5.3)    | 5.15 | .023 |
| Misconduct:                          |           |           |      |      |
| - Insult                             | 252(83.4) | 67(71.3)  | 6.78 | .009 |
| - Threat                             | 141(46.7) | 42(44.7)  | 0.12 | n.s. |
| - Bodily contact                     | 77(25.5)  | 37(39.4)  | 6.72 | .010 |
| - Throwing objects                   | 42(13.9)  | 20(21.3)  | 2.95 | n.s. |
| - Use of a weapon                    | 14(4.6)   | 5(5.3)    | 0.07 | n.s. |
| Consequences:                        |           |           |      |      |
| - Interruption of work               | 61(64.9)  | 210(69.8) | 0.79 | n.s. |
| - Medical treatment                  | 29(9.6)   | 14(15.1)  | 2.15 | n.s. |
| - Psychological support              | 16(5.3)   | 6(6.4)    | 0.16 | n.s. |
| - Hospital care                      | 2(0.7)    | 1(1.1)    | 0.15 | n.s. |
| - Home care                          | -         | 2(2.2)    | 6.53 | .011 |
| - No consequences                    | 64(21.3)  | 26(28)    | 1.76 | n.s. |
| The attack could have been prevented | 104(40)   | 25(29.4)  | 3.07 | n.s. |

Note. n.s. = not statistically significant.

## Text analysis

Based on findings from the descriptive analysis, age, years of experience and profession were used as illustrative variables. The analysis of the administrative record drawn up by female HCWs showed that the corpus was composed of 14,951 occurrences (frequency of words in absolute values), 2,739 distinct forms (words with frequency > 3; mean frequency = 13 per form) and 1,345 *hapax* (words used only once, occurrences with a frequency = 1). The overall number of elementary context units was 516. The five most frequent words (associated forms) in the corpus were *patient+* (n = 329), *aggressi<* (n = 125), *medic<* (n = 62), *wait<* (n = 61), and *staff* (n = 39). The dendrogram of stable classes (Figure 1) shows the classification procedure used to create the two classes that emerged (amount of variance explained = 96.9%). For each class, the first characterizing five words are presented in order of the  $\chi^2$  results (Table 2), together with the associated illustrative variables.

INSERT FIGURE 1 ABOUT HERE

Table 2. Findings from text corpus of administrative records compiled by female HCW victims of workplace violence.

| Class I - <i>Waiting time</i>                 |          | Class II - <i>Physical attack</i>                  |          |
|-----------------------------------------------|----------|----------------------------------------------------|----------|
| <i>Words</i>                                  | $\chi^2$ | <i>Words</i>                                       | $\chi^2$ |
| Visit<                                        | 20       | Kick+                                              | 88       |
| Wait<                                         | 17       | Agitat<                                            | 76       |
| Therap+                                       | 13       | Cris+                                              | 69       |
| Work<                                         | 12       | Personal+                                          | 63       |
| Triage                                        | 11       | Object+                                            | 56       |
| Illustrative variables: emergency room, ward. |          | Illustrative variables: psychiatric ward, midwife. |          |

Class I explained 75% of the variance and was labelled *Waiting time*. The most representative words in terms of  $\chi^2$  describe the violent episodes as a consequence of patients and relatives waiting for a visit or therapy or of the assignment of degrees of urgency to wounds or illnesses to decide the order in which patients will be treated. This waiting time was considered by the perpetrator as unacceptable. The following sentence is an example of how a female HCW described a violent episode.

*“The patient’s relatives were complaining about the waiting time. They could tell that the staff were overworked. The patient’s son and daughter repeatedly came into the emergency room instead of waiting in the hall. The patient’s son said to not annoy him because otherwise there would be trouble”* (nurse, aged 30-39 years, 6-15 years of work)

Class II explained 25% of the variance and was labelled *Physical attack*. This lexical world refers to the behaviours demonstrated by psychiatric patients during routine activities, such as the distribution of meals. Perpetrators were described as patients who suffered from a psychotic crisis and who physically assaulted an HCW. The sentence below provides an example of a respondent’s textual production.

1  
2  
3 “At the end of the dinner, the patient had a crisis; he became aggressive with staff that was  
4 around him and kicked me in the face, cutting my upper lip” (midwife, aged 30-39 years, 6-15  
5 years of experience)  
6  
7  
8

9 The analysis of the administrative record drawn up by male HCWs showed that the  
10 corpus was composed of 3,804 occurrences, 1,271 distinct forms (mean frequency = 9 per  
11 form) and 795 *hapax*, i.e., words used only once. The overall number of elementary context  
12 units was 144. The five most frequent words (associated forms) in the corpus were *patient+* (n  
13 = 103), *aggressi<* (n = 34), *threat+* (n = 29), *person<* (n = 26), and *medic<* (n = 20). The  
14 dendrogram of stable classes (Figure 2) shows the classification procedure used to create the  
15 five classes that emerged (amount of variance explained = 93.6%). For each class, the first  
16 characterizing five words are presented in order of the Chi-squared results (Table 3), together  
17 with the associated illustrative variables.  
18  
19  
20  
21  
22  
23  
24  
25  
26  
27  
28  
29

30  
31 INSERT FIGURE 2 ABOUT HERE  
32  
33  
34  
35  
36

37 Table 3. Findings from text corpus of administrative records compiled by male HCW victims  
38 of workplace violence.  
39  
40  
41

|              |          | <i>Verbal violence</i> |          |              |          | <i>Corporeal assault</i> |          |              |          |
|--------------|----------|------------------------|----------|--------------|----------|--------------------------|----------|--------------|----------|
| Class I      |          | Class II               |          | Class III    |          | Class IV                 |          | Class V      |          |
| <i>Words</i> | $\chi^2$ | <i>Words</i>           | $\chi^2$ | <i>Words</i> | $\chi^2$ | <i>Words</i>             | $\chi^2$ | <i>Words</i> | $\chi^2$ |
| Wait<        | 47       | Insult<                | 48       | Colleague+   | 12       | Launch<                  | 57       | Follow<      | 24       |
| Ask<         | 30       | Staff                  | 11       | Ward         | 11       | Object+                  | 45       | Therap+      | 20       |
| Visit        | 25       | Motiv<                 | 10       | Verbal<      | 11       | Kick+                    | 22       | Nois+        | 19       |
| Time         | 24       | Recei<                 | 9        | Patient+     | 11       | Hit<                     | 16       | Attempt<     | 15       |

| Behaviour+                                          | 24 | Phon+                                                                                     | 9 | Relative+                                                   | 9 | Person<                                                              | 16 | Violen<                                               | 15 |
|-----------------------------------------------------|----|-------------------------------------------------------------------------------------------|---|-------------------------------------------------------------|---|----------------------------------------------------------------------|----|-------------------------------------------------------|----|
| Illustrative variables:<br>emergency room,<br>nurse |    | Illustrative variables:<br>emergency room,<br>professional team's<br>back-office activity |   | Illustrative variables:<br>ward, medical<br>doctor, midwife |   | Illustrative variables:<br>psychiatric ward,<br>administrative staff |    | Illustrative variables:<br>psychiatric ward,<br>nurse |    |

The dendrogram (Figure 2) shows the classification procedure used to create the five classes that emerged and highlights which classes are closer and therefore more similar. Specifically, the dendrogram shows that Classes I, II and III are more similar than Classes IV and V. At the same time, Classes IV and V are more similar than the other classes. Classes I, II and III explain – together – 65% of the variance; Classes IV and V explain 35% of the variance.

Classes I, II and III were labelled *Verbal violence*. The words characterizing these classes were related to violent behaviours – such as insults and threats – that HCWs experienced principally in the emergency room and ward, both through direct contact (face to face) and by phone. In these episodes, one or more colleagues were involved. Below are some examples from the descriptions of violent events made by male HCWs:

*“Before the conclusion of the visit, the father started to attack me verbally. He told me ‘I pay the taxes, I ask you to do everything, I do not go out until the child has a diagnosis’. After reiterating that it is not possible to perform this exam in an emergency room, the father threatened me and the nurse verbally, repeatedly”* (medical doctor, aged 40-49 years, 6-15 years of experience)

*“I phoned the patient’s son to inform him of the imminent discharge of his father. I was insulted with elevated tone repeatedly. It was impossible to manage communication; I did not reply in any way to the insults”* (nurse, 6-15 years of experience)



1  
2  
3        *“The patient’s husband accused me and my colleague of not respecting the numbering in the*  
4        *call for assistance. The colleague explained to him that there is a work plan, but he verbally*  
5        *attacked us”* (nurse, aged  $\geq 50$  years, 16-25 years of experience)  
6  
7  
8

9        Classes IV and V were labelled *Corporeal assault*. The words characterizing these  
10       classes were related to physical violent behaviours – such as hitting and throwing objects –  
11       which HCWs experienced principally in the psychiatric ward. Below are some examples of  
12       sentences from administrative records:  
13  
14  
15  
16

17  
18        *“While my colleague and I were preparing a medication, we were interrupted by the noise of*  
19        *shots coming from the kitchen door. Then, we were reached for and assaulted by the patient”*  
20        (nurse, aged  $>50$  years, 6-15 years of experience)  
21  
22

23        *“An agitated patient – for no apparent reason – pushed a cart against the entrance door to*  
24        *break through. He was shunted out, and then he came back and threatened to break our arms”*  
25        (administrative staff, aged 40-49 years, 16-25 years of experience)  
26  
27  
28  
29  
30

## 31 32 **DISCUSSION**

33  
34        The findings from the descriptive analysis showed some differences based on the HCW’s  
35        gender. Male HCWs aged  $< 30$  years did not report violent episodes that occurred in the  
36        workplace, while male HCWs with 6-15 years of experience reported more violent episodes  
37        than their female counterparts did. Among the HCW professions, nursing was the profession  
38        in which HCWs were more prone to experience a violent episode, confirming the results  
39        of [11]. Nevertheless, the findings showed that male medical doctors were more prone to  
40        report violent episodes than female medical doctors. Confirming the findings of Magnavita  
41        and Heponiemi [10], in this study, female HCWs experienced more verbal violence (insults)  
42        than male HCWs did, while male HCWs experienced more physical violence (bodily contact)  
43        than female HCWs did. Thus, our hypothesis was confirmed. An interesting finding concerns  
44        the perpetrator: female HCWs experienced a violent episode acted out by a patient’s relative  
45        more often than male HCWs did, and male HCWs experienced a violent episode acted out by  
46  
47  
48  
49  
50  
51  
52  
53  
54  
55  
56  
57  
58  
59  
60

1  
2  
3 a visitor more often than female HCWs did. Regarding the workplace, type of activity, and  
4 work shift, no statistically significant difference between genders emerged. This finding did  
5 not confirm the results of Magnavita and Heponiemi [10], as in this study, it was not found  
6 that male HCWs experienced workplace violence in wards more often than female HCWs did.  
7  
8  
9

10  
11  
12 Text analyses showed that female and male HCWs reported violent episodes in  
13 different ways. The findings from the text analysis of female HCWs identified a contextual  
14 factor for the violent episodes that occurred principally in those who were working in  
15 emergency rooms and wards. This contextual factor is the waiting time, a condition in which  
16 a patient and a patient's relative – as suggested by Schablon and colleagues [14] – could  
17 experience anxiety, confusion, and fear. Moreover, female HCWs (in particular, midwives)  
18 describe the violent episodes that occurred in the psychiatric ward as a consequence of a  
19 mental health disorder and noted that the assault was unpredictable. Thus, it seems that female  
20 HCWs perceive dealing with violence as part of their role [49]. Male HCWs use different  
21 words to describe violent episodes. They, more often than female HCWs, described the  
22 episodes including the witness of the episode, namely, colleagues. Male HCWs described  
23 episodes that occurred in the emergency room and ward (verbal violence) and in the  
24 psychiatric ward (corporeal assault) in the same way that female HCWs did. These episodes  
25 were related more to the type of profession than to the gender of the HCWs. The other  
26 illustrative variables (age and years of experience) did not have an effect on the differences  
27 between how male and female HCWs experience violent episodes.  
28  
29  
30  
31  
32  
33  
34  
35  
36  
37  
38  
39  
40  
41  
42  
43  
44  
45  
46  
47  
48

49 This study has strengths and limitations. Regarding strengths, in this study,  
50 administrative records in which HCWs experienced violent episodes were used. Usually, self-  
51 administered questionnaires are utilized to collect data about workplace violence. However,  
52 self-assessment could be affected by recall bias [50]; thus, this method does not solve the  
53 problem of overreporting or underreporting: a long study period could also influence the  
54  
55  
56  
57  
58  
59  
60

1  
2  
3 victim's memory. The analysis of reports completed within 72 hours of the aggression permits  
4 the retrieval of important information about the episode. Moreover, in this study, a qualitative  
5 analysis was used to identify differences between genders in reporting these episodes.  
6  
7

8  
9  
10 According to Griffiths and Schabracq [51], the majority of studies in work and health  
11 psychology and investigations on workplace violence utilize a quantitative approach: this  
12 choice stems from the fact that this method allows large numbers of subjects to complete  
13 standardized questionnaires. Otherwise, a qualitative approach permits the gathering of the  
14 complexity and nuances of individual experiences and reveals the range of ways in which  
15 common features operate in experiences of workplace violence [52]. Indeed, this method was  
16 useful to better understand the lexicon that characterized the victimization experienced by  
17 female and male HCWs.  
18  
19  
20  
21  
22  
23  
24  
25  
26  
27

28 This study also has weaknesses. First, because HCWs decided whether to report violent  
29 episodes, the results cannot be generalized and should be taken with caution. Thus, it was not  
30 possible to overcome the bias in reporting violence, as HCWs may be more likely to report  
31 serious events and exclude less serious ones [53]. Future research should explore, in a more  
32 comprehensive way, this phenomenon within health organizations. For example, interviews  
33 and focus group discussion techniques could be used to better understand the obtained results  
34 and how to promote the reporting of all violent behaviour, not only the most serious events: as  
35 recommended by the Italian Ministry of Health [32], a better comprehension of workplace  
36 violence could be useful to prevent it. Another limitation is in the procedure adopted:  
37 administrative records had different styles of reports, which we tried to make homogeneous  
38 through a classification procedure. This process included a subjective component, which must  
39 be considered in any narrative analysis [54]. The use of a mixed-method technique could  
40 permit the description of the phenomenon by a quantitative and qualitative approach. Future  
41  
42  
43  
44  
45  
46  
47  
48  
49  
50  
51  
52  
53  
54  
55  
56  
57  
58  
59  
60

1  
2  
3 research could use this technique to expand the scope and improve the analytic power of  
4  
5 studies on workplace violence in the healthcare sector [55].  
6

## 7 **CONCLUSIONS**

8  
9  
10 Overall, the findings from this explorative study suggest that there is a gender difference not  
11  
12 only in the characteristics of workplace violence perpetrated by patients, patients' relatives  
13  
14 and visitors but also in the way in which these episodes are described. Consequently, as noted  
15  
16 by Lawoko and colleagues [14] and Chen and colleagues [10], it is important in informative  
17  
18 and preventive courses to consider gender differences in experiencing a violent episode. For  
19  
20 female HCWs, it could be useful to provide clear messages that the acceptance of such  
21  
22 violence is not "part of the job" [27,56], explaining that anger should not be taken as an  
23  
24 acceptable emotion in the healthcare environment and that exposure to verbal violence should  
25  
26 not be accepted as a hazard of the profession [57]. For male HCWs, it could be useful to  
27  
28 reflect on feelings related to the stigma of victimization and to stress that a witness is not  
29  
30 necessary to corroborate a male HCW's version of the event. This finding could be analysed  
31  
32 in greater depth through an investigation that involves witnesses of the violent episodes  
33  
34 describing the episodes from their points of view: a follow-up study could include interviews  
35  
36 with staff on gender differences in the long-term impact of these events.  
37  
38  
39

40  
41  
42 Moreover, these findings could be utilized by health organization management to better  
43  
44 organize the security arrangements in some departments, to manage the overload of the  
45  
46 emergency room and to increase the use of safety devices.  
47  
48

49  
50 In conclusion, the findings could be used by health organization management to  
51  
52 improve individual measures, such as intervention programmes, counselling, and  
53  
54 psychological help, to reflect on victimization experiences and the way in which female and  
55  
56 male HCWs react to and cope with workplace violence.  
57  
58  
59  
60

1  
2  
3 **Acknowledgements.** The authors thank Ms. Daniela Cosentino and Mr. Andrea Caputo (M.S.  
4 in Psychology) for their assistance in the transcription of the administrative records.  
5  
6

7 **Competing interests statement.** We declare that we have no significant competing financial,  
8 professional, or personal interests that might have influenced the performance or presentation  
9 of the work described in this manuscript.  
10  
11  
12

13 **Funding statement.** This research received no specific grant from any funding agency in the  
14 public, commercial or not-for-profit sectors.  
15  
16  
17

18 **Ethical approval.** The Local Ethics Committee (Comitato di Bioetica dell'Ateneo, University  
19 of Torino) approved the research project in January 17, 2019 (Prot. 19468).  
20  
21  
22

23 **Author Contributions.** Conceptualization: D.A.M., C.G.C. and M.G.; methodology:  
24 D.A.M.; investigation: D.A.M., P.P., F.G. and M.G.; data analysis: D.A.M.; writing (original  
25 draft preparation): D.A.M. and C.G.C.; writing (review and editing): D.A.M., C.G.C. and  
26 M.G.  
27  
28  
29  
30  
31  
32  
33  
34

## 35 REFERENCES

- 36  
37 1 WHO. Violence: a public health priority. Geneva: World Health Organization 1995.  
38  
39 2 Cooper CL, Swanson N. Workplace violence in the health sector. State of the art. Geneva:  
40 Organización Internacional de Trabajo, Organización Mundial de la Salud, Consejo  
41 Internacional de Enfermeras Internacional de Servicios Públicos 2002.  
42  
43  
44  
45 3 Phillips JP. Workplace violence against health care workers in the United States. *New*  
46 *England journal of medicine* 2016;374(17):1661-1669. doi:10.1056/NEJMra1501998  
47  
48  
49 4 Sun P, Zhang X, Sun Y, Ma H, Jiao M, Xing K, Kang Z, et al. Workplace violence against  
50 health care workers in North Chinese hospitals: a cross-sectional survey. *Int. J.*  
51 *Environ. Res. Public Health* 2017;14(1):96. doi:10.3390/ijerph14010096  
52  
53  
54  
55 5 Elliott PP. Violence in healthcare. *Nurs Manage* 1997:38-41.  
56  
57  
58  
59  
60

- 1  
2  
3 6 Grottole E, Ciriello S, Gabriele M, Giudice A, Lilli M, Mammi F, Quaranta D, Rocca K,  
4  
5 Spadone F, Magnavita N. Assaults and nuisances in health care environment. *Giornale*  
6  
7 *italiano di medicina del lavoro ed ergonomia* 2007;29(3):653-5.  
8  
9
- 10 7 Iozzino L, Ferrari C, Large M, Nielssen O, De Girolamo G. Prevalence and risk factors of  
11  
12 violence by psychiatric acute inpatients: a systematic review and meta-analysis. *PloS*  
13  
14 *one* 2015;10(6):e0128536. doi:10.1371/journal.pone.0128536  
15  
16
- 17 8 Arnetz JE, Hamblin L, Essenmacher L, Upfal MJ, Ager J, Luborsky M. Understanding  
18  
19 patient-to-worker violence in hospitals: a qualitative analysis of documented incident  
20  
21 reports. *J Adv Nurs* 2015;71(2):338-48. doi:10.1111/jan.12494  
22  
23
- 24 9 Kim SC, Ideker K, Todicheeny-Mannes D. Usefulness of aggressive behaviour risk  
25  
26 assessment tool for prospectively identifying violent patients in medical and surgical  
27  
28 units. *J Adv Nurs* 2012;68(2):349-57. doi: 10.1111/j.1365-2648.2011.05744.x  
29  
30
- 31 10 Magnavita N, Heponiemi T. Violence towards health care workers in a Public Health Care  
32  
33 Facility in Italy: a repeated cross-sectional study. *BMC Health Serv*  
34  
35 *Res* 2012;12(1):108. doi:10.1186/1472-6963-12-108  
36  
37
- 38 11 Renwick L, Lavelle M, James K, Stewart D, Richardson M, Bowers L. The physical and  
39  
40 mental health of acute psychiatric ward staff, and its relationship to experience of  
41  
42 physical violence. *International journal of mental health nursing* 2019;28(1):268-77.  
43  
44 doi: 10.1111/inm.12530  
45  
46
- 47 12 Hahn S, Hantikainen V, Needham I, Kok G, Dassen T, Halfens RJG. Patient and visitor  
48  
49 violence in the general hospital, occurrence, staff interventions and consequences: a  
50  
51 cross-sectional survey. *J Adv Nurs* 2012;68(12):2685-2699.  
52  
53
- 54 13 Ahmad M, Al-Rimawi R, Masadeh A, Atoum M. Workplace violence by patients and their  
55  
56 families against nurses: Literature review. *Int J Nurs Health Sci* 2015;2(4):46-55.  
57  
58  
59  
60

- 1  
2  
3 14 Lawoko, S, Soares, JJ, Nolan P. Violence towards psychiatric staff: A comparison of  
4  
5 gender, job and environmental characteristics in England and Sweden. *Work*  
6  
7 *Stress* 2004;18(1):39-55. doi: 10.1080/02678370410001710337  
8  
9
- 10 15 Schablon A, Wendeler D, Kozak A, Nienhaus A, Steinke S. Prevalence and Consequences  
11  
12 of Aggression and Violence towards Nursing and Care Staff in Germany—A Survey.  
13  
14 *Int J Environ Res Public Health* 2018;15(6):1274. doi:10.3390/ijerph15061274  
15  
16
- 17 16 Maguire BJ, O'Meara P, O'Neill BJ, Brightwell R. Violence against emergency medical  
18  
19 services personnel: A systematic review of the literature. *American journal of*  
20  
21 *industrial medicine* 2018;61(2):167-80. doi: 10.1002/ajim.22797  
22  
23
- 24 17 Italian Ministry of Health. Personale delle A.S.L. e degli istituti di cura  
25  
26 pubblici. [www.salute.gov.it/imgs/C\\_17\\_pubblicazioni\\_2161\\_allegato.pdf](http://www.salute.gov.it/imgs/C_17_pubblicazioni_2161_allegato.pdf)  
27
- 28 18 Morganson, VJ, Brown SE. Gender and Sexualized Aggression in the Workplace. In:  
29  
30 Nadler JY, Lowery MR, eds. *The War on Women in the United States: Beliefs,*  
31  
32 *Tactics, and the Best Defenses.* Praeger Publishing 2018:2051.  
33  
34
- 35 19 Chen C, Smith PM, Mustard C. Gender differences in injuries attributed to workplace  
36  
37 violence in Ontario 2002–2015. *Occup Environ Med* 2019;76(1):3-9.  
38  
39 doi:10.1136/oemed-2018-105152  
40  
41
- 42 20 Itzhaki M, Peles-Bortz A, Kostistky H, Barnoy D, Filshinsky V, Bluvstein I. Exposure of  
43  
44 mental health nurses to violence associated with job stress, life satisfaction, staff  
45  
46 resilience, and post-traumatic growth. *Int J Ment Health Nurs* 2015;24(5):403-412.  
47  
48 doi.org/10.3389/fpsy.2018.00059  
49  
50
- 51 21 Hampton D, Rayens MK. Impact of psychological empowerment on workplace bullying  
52  
53 and intent to leave. *JONA: The Journal of Nursing Administration.* 2019;49(4):179-  
54  
55 85. doi: 10.1097/NNA.0000000000000735  
56  
57  
58  
59  
60



- 1  
2  
3 22 Laeeque SH, Bilal A, Babar S, Khan Z, Ul Rahman S. How patient-perpetrated workplace  
4  
5 violence leads to turnover intention among nurses: The mediating mechanism of  
6  
7 occupational stress and burnout. *Journal of Aggression, Maltreatment & Trauma*  
8  
9 2018;27(1):96-118.doi:10.1080/10926771.2017.1410751  
11
- 12 23 Kim H, Kim JS, Choe K, Kwak Y, Song JS. Mediating effects of workplace violence on  
13  
14 the relationships between emotional labour and burnout among clinical nurses.  
15  
16 *Journal of advanced nursing* 2018;74(10):2331-9.doi: 10.1111/jan.13731  
17  
18
- 19 24 Findorff MJ, McGovern PM, Wall MM, Gerberich SG. Reporting violence to a health care  
20  
21 employer: a cross-sectional study. *AAOHN journal* 2005;53(9):399-406.  
22  
23 doi:10.1177/216507990505300906  
24  
25
- 26 25 Gillespie GL, Leming-Lee TS, Crutcher T, Mattei J. Chart It to Stop It. *J Nur Care Qual*  
27  
28 2016;31(3):254-61. doi:10.1097/NCQ.000000000000172  
29  
30
- 31 26 Clements PT, DeRanieri JT, Clark K, Manno MS, Kuhn DW. Workplace violence and  
32  
33 corporate policy for health care settings. *Nur Econ* 2005;23(3):119-124.  
34  
35
- 36 27 Kennedy MP. Violence in emergency departments: under-reported, unconstrained, and  
37  
38 unconscionable. *Med J Aust* 2005;183(7):362-365. doi:10.5694/j.1326-  
39  
40 5377.2005.tb07084.x  
41
- 42 28 Chen C, Smith PM, Mustard C. Gender differences in injuries attributed to workplace  
43  
44 violence in Ontario 2002–2015. *Occup Environ Med* 2019;76(1):3-9.  
45  
46 doi:10.1136/oemed-2018-105152  
47  
48
- 49 29 Eurofound. Fifth European Working Conditions Survey. Publication Office of the  
50  
51 European Union. Luxembourg, 2012. Available at  
52  
53 [https://www.eurofound.europa.eu/it/publications/report/2012/working-](https://www.eurofound.europa.eu/it/publications/report/2012/working-conditions/fifth-european-working-conditions-survey-overview-report)  
54  
55 [conditions/fifth-european-working-conditions-survey-overview-report](https://www.eurofound.europa.eu/it/publications/report/2012/working-conditions/fifth-european-working-conditions-survey-overview-report)  
56  
57  
58  
59  
60



- 1  
2  
3 30 Istat. Il disagio nelle relazioni lavorative. Istat 2010. Available at  
4  
5 <https://www.istat.it/it/archivio/5191>  
6  
7  
8 31 Inail. Violenza, aggressione e non solo. Dati Inail 2018. Available at  
9  
10 <https://www.inail.it/cs/internet/docs/alg-dati-inail-2018-novembre.pdf>  
11  
12 32 Ministero della Salute. Raccomandazione per prevenire gli atti di violenza a danno degli  
13  
14 operatori sanitari. Raccomandazione n. 8, novembre 2007.  
15  
16 [http://www.salute.gov.it/portale/documentazione/p6\\_2\\_2\\_1.jsp?id=721](http://www.salute.gov.it/portale/documentazione/p6_2_2_1.jsp?id=721)  
17  
18 33 Hopkins L, Taylor L, Bowen E, Wood C. A qualitative study investigating adolescents'  
19  
20 understanding of aggression, bullying and violence. *Child Youth Serv Rev*  
21  
22 2013;35(4):685-93. doi:10.1016/j.chilyouth.2013.01.012  
23  
24  
25 34 Patton MQ. Qualitative research and evaluation methods. Thousand Oaks, CA: Sage  
26  
27 2002:339-427.  
28  
29  
30 35 Ritchie J, Lewis J, Nicholls CM, Ormston R, eds. Qualitative research practice: A guide  
31  
32 for social science students and researchers. Thousand Oaks, CA: Sage 2013.  
33  
34 36 Fetters MD, Curry LA, Creswell JW. Achieving integration in mixed methods designs—  
35  
36 principles and practices. *Health Serv Res* 2013;48:2134-56. doi:10.1111/1475-  
37  
38 6773.12117  
39  
40  
41 37 Ramacciati N, Ceccagnoli A, Addey B, Rasero L. Violence towards emergency nurses.  
42  
43 The Italian national survey 2016: A qualitative study. *Int J Nurs Stud* 2018;81:21-29.  
44  
45 doi:10.1016/j.ijnurstu.20  
46  
47  
48 38 Shahzad A, Malik RK. Workplace Violence: An Extensive Issue for Nurses in Pakistan—  
49  
50 A Qualitative Investigation. *J Interpers Violence* 2014;29,11:2021-2034.  
51  
52 doi:10.1177/088626051351600518.01.017  
53  
54  
55 39 Pattani R, Ginsburg S, Johnson AM, Moore JE, Jassemi S, Straus SE. Organizational  
56  
57 factors contributing to incivility at an academic medical center and systems-based  
58  
59  
60

- 1  
2  
3 solutions: a qualitative study. *Academic Medicine* 2018;93(10):1569.doi:  
4  
5 10.1097/ACM.0000000000002310  
6  
7  
8 40 Arnetz J, Hamblin LE, Sudan S, Arnetz B. Organizational determinants of workplace  
9  
10 violence against hospital workers. *Journal of occupational and environmental*  
11  
12 *medicine* 2018;60(8):693.doi: 10.1097/JOM.0000000000001345  
13  
14  
15 41 Tucker AL, Spear SJ. Operational failures and interruptions in hospital nursing. *Health*  
16  
17 *Serv Res* 2006; 41(3p1):643-662. doi:10.1111/j.1475-6773.2006.00502.x  
18  
19  
20 42 Agresti A. *Categorical Data Analysis* (3<sup>rd</sup> ed.). Hoboken, New Jersey: John Wiley & Sons  
21  
22 Inc. 2002:267-313.  
23  
24 43 Matteucci MC, Tomasetto C. Alceste: un software per l'analisi dei dati testuali. In: Mazzara  
25  
26 BM, ed. *Metodi qualitativi in psicologia sociale*. Roma: Carocci 2002:305-27.  
27  
28  
29 44 Riff D, Lacy S, Fico F. *Analyzing media messages: Using quantitative content analysis in*  
30  
31 *research*. New York: Routledge. 2014. doi:10.4324/9780203551691  
32  
33  
34 45 Reinert M. Un logiciel d'analyse lexicale. *Cahiers de l'analyse des données* 1986;11(4):471-  
35  
36 81.  
37  
38 46 Reinert, M. Mondes lexicaux et topoi dans l'approche de Alceste. [Lexical worlds and topoi  
39  
40 in Alceste approach] In: S. Mellet & M. Vuillome, eds. *Mots chiffrés et déchiffrés*  
41  
42 [Coded and decoded words]. Paris, France: Honoré Champion Editeur 1998:289-303.  
43  
44  
45 47 Annese S, Mininni G. La focus group discussion tra analisi del contenuto e analisi del  
46  
47 discorso. In Mazzara BM, ed. *Metodi qualitativi in psicologia sociale*. Roma: Carocci  
48  
49 2002:125-48.  
50  
51  
52 48 Burla L, Knierim B, Barth J, Liewald K, Duetz M, Abel T. From text to codings: intercoder  
53  
54 reliability assessment in qualitative content analysis. *Nurs Res* 2008;57(2):113-7. doi:  
55  
56  
57 49 Brockmann, M. New perspectives on violence in social care. *Journal of Social*  
58  
59 *Work* 2002;2(1):29-44. doi:10.1177/146801730200200103  
60

- 1  
2  
3 50 Brophy, J. T., Keith, M. M., & Hurley, M. (2018). Assaulted and unheard: violence against  
4  
5 healthcare staff. *New solutions: a journal of environmental and occupational health*  
6  
7 *policy*, 27(4), 581-606.  
8  
9
- 10 51 Griffiths A, Schabracq MJ. Work and health psychology as a scientific discipline: Facing  
11  
12 the limits of the natural science paradigm. In: Schabracq MJ, Winnubst JAM, Cooper  
13  
14 CL, eds. *The handbook of work and health psychology*. New York: Wiley 2003:173-  
15  
16 189.  
17  
18
- 19 52 Coyle A. Introduction to qualitative psychological research. In: Lyons E, Coyle A, eds.  
20  
21 *Analysing qualitative data in psychology*. Thousand Oaks, CA: Sage Publications  
22  
23 2007:9-29. doi:10.4135/9781446207536.d7  
24  
25
- 26 53 Findorff MJ, McGovern PM, Wall MM, Gerberich SG. Reporting violence to a health care  
27  
28 employer: a cross-sectional study. *AAOHN Journal* 2005;53(9):399-406.  
29  
30
- 31 54 Amaratunga D, Baldry D, Sarshar M, Newton R. Quantitative and qualitative research in  
32  
33 the built environment: application of “mixed” research approach. *Work*  
34  
35 *study* 2002;51(1):17-31. doi:10.1108/00438020210415488  
36  
37
- 38 55 Sandelowski M. Combining qualitative and quantitative sampling, data collection, and  
39  
40 analysis techniques in mixed-method studies. *Res Nurs & Health* 2000;23(3):246-255.  
41  
42 doi:10.1002/1098240X(200006)23:3<246::AID-NUR9>3.0.CO;2-H  
43  
44
- 45 56 Potera C. Violence against nurses in the workplace. *Am J Nurs* 2016;116(6):20-21.  
46  
47 doi:10.1097/01.NAJ.0000484226.30177.ab  
48
- 49 57 Duxbury, J., & Whittington, R. (2005). Causes and management of patient aggression and  
50  
51 violence: staff and patient perspectives. *Journal of advanced nursing*, 50(5), 469-478.  
52  
53  
54  
55  
56  
57  
58  
59  
60

1  
2  
3 Figure legends:  
4  
5

6 Figure 1. *Text corpus of administrative records compiled by female HCWs victims of*  
7 *workplace violence. The dendogram shows the classification procedure used to create the two*  
8 *classes that emerged (amount of variance explained = 96.9%). Class I explained 75% of the*  
9 *variance and was labelled Waiting time. Class II explained 25% of the variance and was*  
10 *labelled Physical attack.*  
11  
12  
13  
14  
15  
16

17  
18 Figure 2. *Text corpus of administrative records compiled by male HCWs victims of*  
19 *workplace violence. The Dendogram shows the classification procedure used to create the*  
20 *five classes that emerged (amount of variance explained = 93.6%). The dendrogram shows*  
21 *that Classes I, II and III are more similar than Classes IV and V. At the same time, Classes IV*  
22 *and V are more similar than the other classes. Classes I, II and III explain – together – 65%*  
23 *of the variance; Classes IV and V explain 35% of the variance. Classes I, II and III were*  
24 *labelled Verbal violence. Classes IV and V were labelled Corporeal assault.*  
25  
26  
27  
28  
29  
30  
31  
32  
33  
34  
35  
36  
37  
38  
39  
40  
41  
42  
43  
44  
45  
46  
47  
48  
49  
50  
51  
52  
53  
54  
55  
56  
57  
58  
59  
60

1  
2  
3 Figure 1. *Text corpus of administrative records compiled by female HCWs victims of*  
4 *workplace violence. The dendrogram shows the classification procedure used to create the two classes*  
5 *that emerged (amount of variance explained = 96.9%). Class I explained 75% of the variance and*  
6 *was labelled* *Waiting time*. *Class II explained 25% of the variance and was labelled* *Physical attack*.  
7  
8  
9  
10  
11  
12

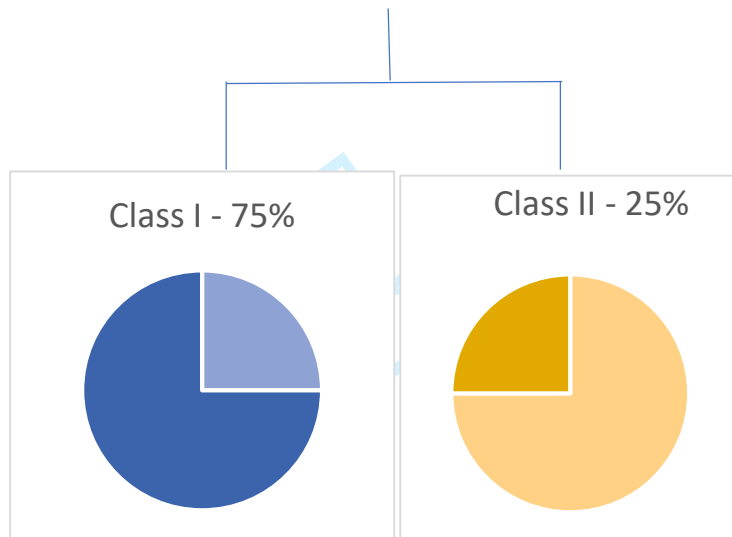

30  
31  
32  
33  
34  
35  
36  
37  
38  
39  
40  
41  
42  
43  
44  
45  
46  
47  
48  
49  
50  
51  
52  
53  
54  
55  
56  
57  
58  
59  
60

review only

1  
 2 Figure 2. Text corpus of administrative records compiled by male HCWs victims of workplace violence. The Dendrogram shows the  
 3 classification procedure used to create the five classes that emerged (amount of variance explained = 93.6%). The dendrogram shows that Classes  
 4 I, II and III are more similar than Classes IV and V. At the same time, Classes IV and V are more similar than the other classes. Classes I, II and III  
 5 explain – together – 65% of the variance; Classes IV and V explain 35% of the variance. Classes I, II and III were labelled Verbal violence. Classes  
 6 IV and V were labelled Corporeal assault.  
 7  
 8  
 9  
 10  
 11  
 12  
 13  
 14  
 15  
 16  
 17  
 18  
 19  
 20  
 21  
 22  
 23  
 24  
 25  
 26  
 27  
 28  
 29  
 30  
 31  
 32  
 33  
 34  
 35  
 36  
 37  
 38  
 39  
 40  
 41  
 42  
 43  
 44  
 45  
 46

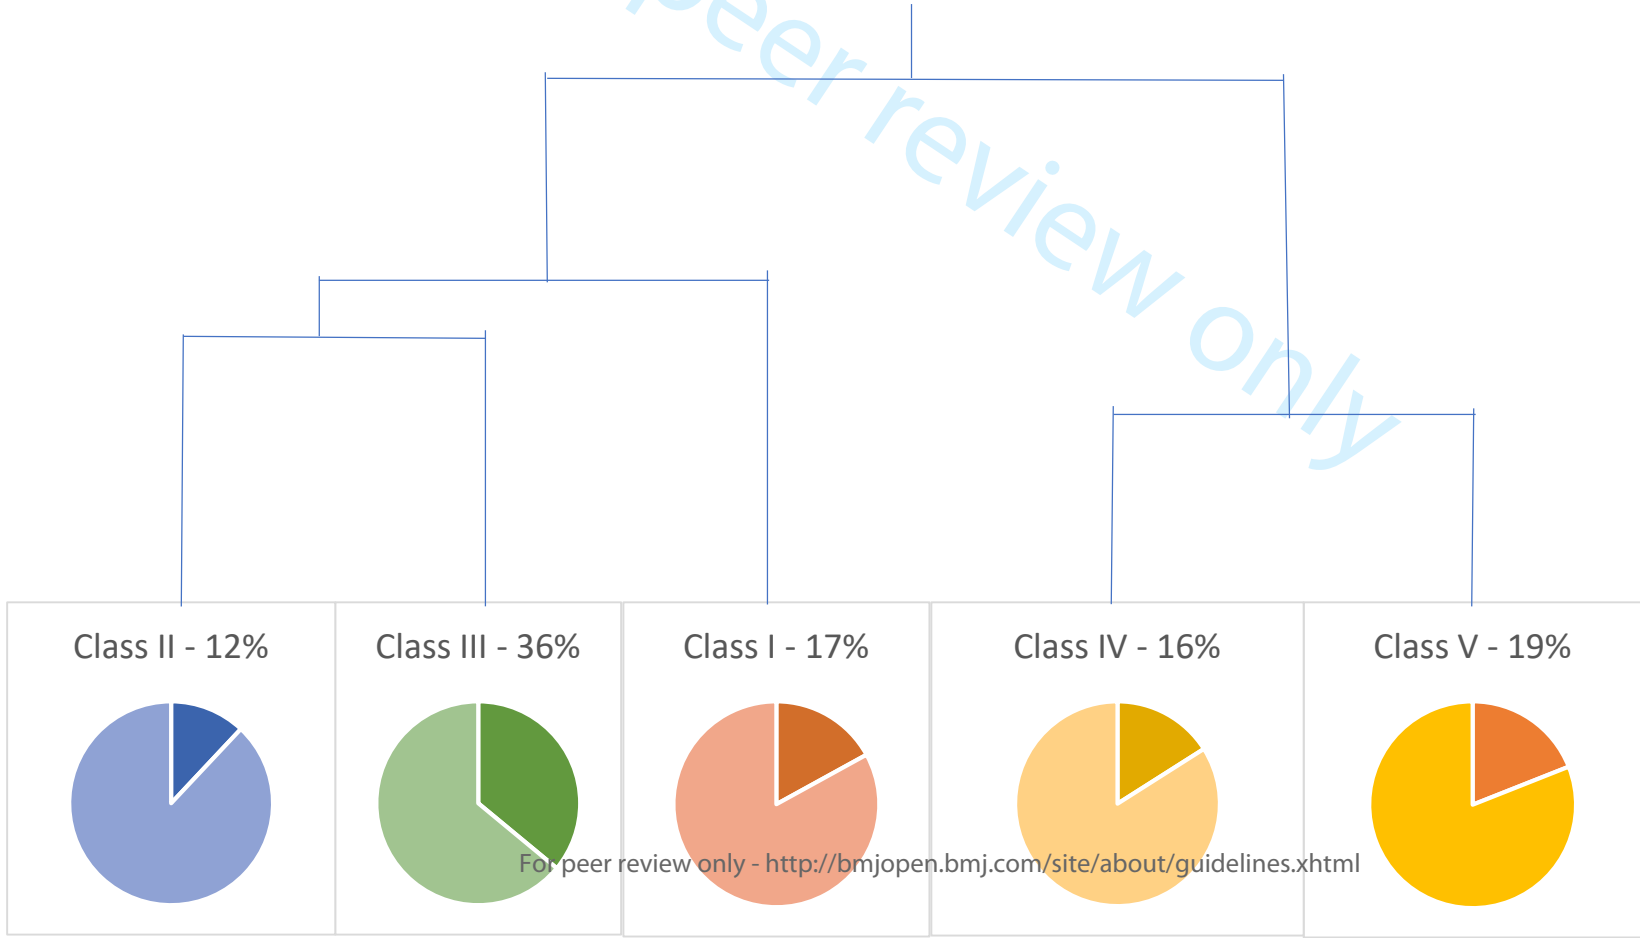

# BMJ Open

## Gender differences in reporting workplace violence: A qualitative analysis of administrative records of violent episodes experienced by healthcare workers in a large public Italian hospital

|                                 |                                                                                                                                                                                                                                                                                                                                                                                                                                                                              |
|---------------------------------|------------------------------------------------------------------------------------------------------------------------------------------------------------------------------------------------------------------------------------------------------------------------------------------------------------------------------------------------------------------------------------------------------------------------------------------------------------------------------|
| Journal:                        | <i>BMJ Open</i>                                                                                                                                                                                                                                                                                                                                                                                                                                                              |
| Manuscript ID                   | bmjopen-2019-031546.R3                                                                                                                                                                                                                                                                                                                                                                                                                                                       |
| Article Type:                   | Original research                                                                                                                                                                                                                                                                                                                                                                                                                                                            |
| Date Submitted by the Author:   | 17-Oct-2019                                                                                                                                                                                                                                                                                                                                                                                                                                                                  |
| Complete List of Authors:       | Acquadro Maran, Daniela; University of Turin, Department of Psychology<br>Cortese, Claudio Giovanni; University of Turin, Department of Psychology<br>PAVANELLI, Pierluigi ; Azienda Ospedaliero Universitaria Città della<br>Salute e della Scienza di Torino<br>Fornero, Giulio ; Azienda Ospedaliero Universitaria Città della Salute e<br>della Scienza di Torino<br>Gianino, Maria Michela; University of Turin, Department of Public Health<br>Sciences and Pediatrics |
| <b>Primary Subject Heading</b>: | Medical management                                                                                                                                                                                                                                                                                                                                                                                                                                                           |
| Secondary Subject Heading:      | Qualitative research                                                                                                                                                                                                                                                                                                                                                                                                                                                         |
| Keywords:                       | Human resource management < HEALTH SERVICES ADMINISTRATION & MANAGEMENT, healthcare workers, workplace violence, qualitative analysis, gender difference, Health & safety < HEALTH SERVICES ADMINISTRATION & MANAGEMENT                                                                                                                                                                                                                                                      |
|                                 |                                                                                                                                                                                                                                                                                                                                                                                                                                                                              |

SCHOLARONE™  
Manuscripts

1  
2  
3 **Gender differences in reporting workplace violence:**  
4

5 **A qualitative analysis of administrative records of violent episodes experienced by**  
6  
7 **healthcare workers in a large public Italian hospital**  
8  
9

10 ACQUADRO MARAN Daniela<sup>1</sup>, CORTESE Claudio Giovanni<sup>1</sup>, PAVANELLI Pierluigi<sup>2</sup>,  
11  
12 FORNERO Giulio<sup>2</sup>, GIANINO Maria Michela<sup>3</sup>  
13  
14

15  
16  
17 <sup>1</sup> Department of Psychology, University of Turin, Turin, Italy  
18

19 <sup>2</sup> AOU Città della salute e della Scienza Teaching Hospital, Turin, Italy  
20

21 <sup>3</sup> Department of Public Health Sciences and Pediatrics, University of Turin, Italy  
22  
23

24  
25  
26 *Corresponding author (c. a.):* Claudio Giovanni CORTESE, Phd, Full Professor, Department  
27  
28 of Psychology, University of Turin, Via Verdi 10, Turin, Italy. E-mail:  
29  
30 claudio.cortese@unito.it, phone +39 011. 6702040  
31  
32

33  
34  
35 - Daniela ACQUADRO MARAN, Phd, Assistant Professor, Department of Psychology,  
36  
37 University of Turin, Turin, Italy. E-mail: daniela.acquadro@unito.it  
38

39  
40 - Claudio Giovanni CORTESE, Phd, Full Professor, Department of Psychology, University of  
41  
42 Turin, Turin, Italy. E-mail: claudio.cortese@unito.it  
43

44 - Pierluigi PAVANELLI, MD, Director, Security and Environment Unit (S.P.P.), AOU Città  
45  
46 della salute e della Scienza Teaching Hospital, Turin, Italy. E-mail:  
47  
48 ppavanelli@cittadellasalute.to.it  
49

50  
51 - Giulio FORNERO, MD, Director, Quality and Safety of Care Paths Department, AOU Città  
52  
53 della salute e della Scienza Teaching Hospital, Turin, Italy. E-mail:  
54  
55 gfornero@cittadellasalute.to.it  
56  
57  
58  
59  
60



1  
2  
3 - Maria Michela GIANINO, Associate Professor, Department of Public Health Sciences and  
4  
5 Pediatrics, University of Turin, Turin, Italy. E-mail: mariola.gianino@unito.it  
6  
7

8  
9 Word count: 4866  
10  
11  
12  
13  
14  
15  
16  
17  
18  
19  
20  
21  
22  
23  
24  
25  
26  
27  
28  
29  
30  
31  
32  
33  
34  
35  
36  
37  
38  
39  
40  
41  
42  
43  
44  
45  
46  
47  
48  
49  
50  
51  
52  
53  
54  
55  
56  
57  
58  
59  
60

For peer review only

## Gender differences in reporting workplace violence:

### A qualitative analysis of administrative records of violent episodes experienced by healthcare workers in a large public Italian hospital

#### ABSTRACT

**Objectives:** This study aims to analyse, from a descriptive and qualitative point of view, the episodes of violence reported by healthcare workers (HCWs) in a large public Italian hospital. Qualitative analysis permits us to collect the victims' words used to describe the event and the ways in which they dealt with it. A comparison between genders was performed to better understand what type of different strategies could be used to improve the prevention of workplace violence for HCWs.

**Design and Setting:** The retrospective observational study was carried out in "Città della Salute e della Scienza", a complex of four interconnected hospitals situated in northern Italy. This study analysed aggression data from the four-year period of 2015-2018 that included all HCW categories. The data were obtained from the Aggression Reporting Form.

**Participants:** The analysed records were supplied by 396 HCWs (3.6% of all HCWs in the hospital).

**Results:** Male HCWs aged < 30 years did not report violent episodes that occurred in the workplace, while male HCWs with 6-15 years of work experience reported more violent episodes than their female counterparts. Among the HCW professions, nursing was the profession in which HCWs were more prone to experience a violent episode, while male medical doctors were more prone to report violent episodes than female medical doctors. Moreover, female HCWs experienced more verbal violence (insults) than male HCWs did, while male HCWs experienced more physical violence (bodily contact) than female HCWs did.

1  
2  
3 **Conclusions:** The findings from this explorative study suggest that there is a gender  
4  
5 difference in the characteristics of workplace violence perpetrated by patients, patients'  
6  
7 relatives and visitors and in the way in which these episodes are described. Consequently, it is  
8  
9 important for informative and preventive courses to consider gender differences in  
10  
11 experiencing a violent episode.  
12  
13

#### 14 **Strengths and limitations of this study**

15  
16 (Strength) A qualitative analysis was used to collect the victims' descriptions of workplace  
17  
18 violence.  
19

20  
21 (Strength) The method permits the capture of respondents' points of view.  
22

23  
24 (Strength) The comparison between genders could be useful to improve the prevention of  
25  
26 workplace violence in this population.  
27

28  
29 (Limitation) It was not possible to overcome the bias in reporting violence.  
30

31  
32 (Limitation) Unreported incidents could not be included in the study.  
33

34  
35 **Keywords:** healthcare workers; workplace violence; qualitative analysis; gender difference;  
36  
37 reported incidents.  
38

#### 39 **INTRODUCTION**

40  
41 Workplace violence has been defined by the World Health Organization as "the intentional  
42  
43 use of power, threatened or actual, against another person or against a group, in work-related  
44  
45 circumstances, that either results in or has a high degree of likelihood of resulting in injury,  
46  
47 death, psychological harm, maldevelopment, or deprivation"[1].  
48  
49

50  
51 As noted by several investigations [2-4], the healthcare sector is at particular risk of  
52  
53 workplace violence. Elliot [5] estimated that the risk of violence from patients and their  
54  
55 relatives towards healthcare workers (HCWs) is 16 times higher than that towards other  
56  
57 workers. This risk is highest for healthcare workers working in psychiatric wards and  
58  
59  
60

1  
2  
3 emergency rooms [6-7] since they report more violent events than other HCWs, such as those  
4  
5 working in wards [8-10]. As suggested by Renwick and colleagues [11], it is possible that  
6  
7 subjects who work in other wards have biased their answers, presenting themselves as at less  
8  
9 risk than they are in reality because of such complex reasons as denial and social stigma of  
10  
11 reporting workplace violence. At the same time, working in wards with patients who are more  
12  
13 dangerous because they suffer from mental illness (psychiatric ward) or are under the  
14  
15 influence of drugs or alcohol (emergency room), may make workers who are victims of  
16  
17 violence feel more comfortable about reporting violent episodes.  
18  
19  
20

21  
22 Moreover, the risk of aggression is highest for HCWs working as nurses since they  
23  
24 report more violent episodes than do physicians and administrative staff [12]. A possible  
25  
26 explanation for this finding is linked with the nature of their job, as nurses have direct contact  
27  
28 with patients (who could be confused, frightened, or delirious) and their families/friends [13-  
29  
30 15]. In this case, a possible explanation could be found in the sample bias, since in the  
31  
32 literature about nurses being assaulted, respondents who had been assaulted would be  
33  
34 expected to have a higher rate of response than those who had not been assaulted [16].  
35  
36  
37

38  
39 Another possible explanation is linked to gender: in some countries, such as Italy, in  
40  
41 more than 70% of cases, nurses are female [17], and some studies have shown that female  
42  
43 workers are more often affected by violence than their male colleagues [18-19]. Gender is  
44  
45 also related to the type of violence experienced by HCWs; the investigation by Magnavita and  
46  
47 Heponiemi [10] showed that, in hospitals, female nurses experienced verbal violence (such as  
48  
49 yelling and screaming) more often than male nurses, who were more often victims of physical  
50  
51 assault (such as hitting and kicking). Moreover, the importance of investigating the gender  
52  
53 difference in workplace violence experienced by HCWs was noted by Lawoko and colleagues  
54  
55 [14]: “intervention/prevention measures need to review the gender and profession issue. It is  
56  
57 likely that men and women, psychiatrists and nurses may require different interventions  
58  
59  
60

1  
2  
3 related to their specific problems” (page 51). These types of violent episodes affect the  
4  
5 perceived wellbeing of HCWs and could lead to several consequences, such as the  
6  
7 interruption of work, medical treatment, and hospital and/or home care; psychological support  
8  
9 might be needed for the HCWs to cope with the event [20]. Workplace violence might also  
10  
11 lead staff to leave the profession [21].  
12  
13

14  
15 Furthermore, workplace violence in this sector could be related to turnover intention  
16  
17 through occupational stress first and then burnout [22]: regarding this, Kim and colleagues  
18  
19 [23] suggested that the prevention of workplace violence is one way of reducing burnout in  
20  
21 the healthcare sector.  
22  
23

24  
25 An interesting question concerns the reports made by HCWs regarding violent  
26  
27 episodes in the workplace. Findings from investigations have shown that violence, especially  
28  
29 verbal violence [2], in the healthcare sector is under-reported [24-25]. The under-reporting of  
30  
31 violence is not a phenomenon that involves only workplace violence. All forms of violence  
32  
33 (sexual harassment, domestic violence, school bullying, and so on) are under-reported for  
34  
35 different reasons, including both the stigma of victimization, such as shame, isolation, and  
36  
37 fear, and the threat of further violence, which often deter victims from reporting violent  
38  
39 episodes [26].  
40  
41

42  
43 Moreover, for HCWs, there is a risk of desensitization to violence, as violence – due to  
44  
45 contact with frail and ill people – is perceived as part of an HCW’s job [27]. Nevertheless, the  
46  
47 reporting of any act of violence is fundamental in engaging hospital management to activate  
48  
49 appropriate organizational responses. Indeed, the administrative records of violent episodes  
50  
51 experienced by HCWs constitute an important source of information [28] about the type of  
52  
53 violence (physical or verbal), the type of perpetrator (patient, relative, or visitor), the type of  
54  
55 HCW (administrator, midwife, nurse, or physician), the place in which the HCW experienced  
56  
57 the violence (psychiatric ward, emergency room, or ward) and the type of activity that she/he  
58  
59  
60

1  
2  
3 was doing (support activity for patients, professional team back-office activity, or assistance  
4 and patient care). These records permit the prevention of workplace violence, providing  
5 information about, for example, the type of training course that a particular HCW sub-  
6 population needs and/or the safety devices that should be installed in a particular ward.  
7  
8  
9  
10

11  
12 In Europe, the Fifth European Working Conditions Survey [29] shows that, on  
13 average, 14.9% of workers reported levels of subjection to adverse social behaviour, and the  
14 highest level was in the healthcare sector (23%). The overall percentage of reported levels of  
15 subjection to adverse social behaviour in Italian workers was 8%; in the healthcare sector, this  
16 percentage was 41.4% of the workers [30]. There were 1200 total violent behaviours reported  
17 by HWCs in 2018. In most cases, (70%), the victim was female, and the perpetrator was a  
18 patient, a patient's relative or a visitor [31]. To deal with this phenomenon, in 2007, the  
19 Italian Ministry of Health published Recommendation no. 8, "Preventing acts of violence  
20 against health workers". This recommendation had several goals. First, it oversees the  
21 reporting of incidents of violence using official sources, such as the judicial authority, the  
22 police forces and the National Workplace Accident Institute. Second, it promotes the  
23 collection of data through specific surveys to identify the frequency and severity of violent  
24 episodes. The results could be useful for adopting appropriate action from an organizational  
25 and structural point of view, for example, redesigning the space and/or reformulating  
26 procedures for access to the ward. Moreover, data could be used to improve the training  
27 courses that aim to prevent violence, to improve the coping strategies and to reduce the  
28 negative consequences [32].  
29  
30  
31  
32  
33  
34  
35  
36  
37  
38  
39  
40  
41  
42  
43  
44  
45  
46  
47  
48  
49  
50

51 This study aims to analyse, from a descriptive and qualitative point of view, the  
52 episodes of violence experienced by HCWs working in a large public Italian hospital. The  
53 qualitative analysis permits us to collect the victims' words used to describe the event and the  
54 ways in which they dealt with it [33]. The advantage offered by this method is that it allows  
55  
56  
57  
58  
59  
60

1  
2  
3 us to capture respondents' points of view without predetermining their answers [34-35]. This  
4  
5 approach is widely used in social science research [36] and has been used to investigate  
6  
7 HCWs' perceptions of physical and verbal aggression [8, 37-38]. It has also been used, for  
8  
9 example, to investigate the descriptions of violent behaviour provided by workers [39] and  
10  
11 perceptions of the organizational safety climate [40].  
12  
13

14  
15 A comparison between genders was used to better understand what type of  
16  
17 differences, if any, could be used to improve the prevention of workplace violence for HCWs.  
18  
19 Based on the literature review presented above, the hypothesis is that there are gender  
20  
21 differences in the violent episodes experienced by female and male HCWs: female HCWs  
22  
23 experience more verbal violence than their male colleagues, and male HCWs experience more  
24  
25 physical violence than their female colleagues. Moreover, from the analysis of the episodes,  
26  
27 as described by female and male HCWs, we expected that the observed semantic differences  
28  
29 characterized the experience of victimization. This is the novel contribution of this work. We  
30  
31 do not have specific hypotheses about the relationship between gender and the lexical words  
32  
33 used to define the violent episodes; therefore, we intend to analyse this relationship from an  
34  
35 explorative perspective.  
36  
37  
38

## 39 40 **METHOD**

41  
42 The retrospective observational study was carried out in Città della Salute e della Scienza  
43  
44 (City of Health and Science University Hub), a complex of four interconnected hospitals  
45  
46 situated in northern Italy. It has 1917 ordinary hospital beds and more than 400 day hospital  
47  
48 and day surgery beds, and it is one of the largest national and European health hubs, boasting  
49  
50 approximately twelve thousand employees. This study analysed aggression data from the  
51  
52 four-year period of 2015-2018 that included all worker categories. The data were obtained  
53  
54 from the Aggression Reporting Form adopted in 2014 in compliance with the  
55  
56 abovementioned recommendation of the Ministry of Health. The form is available on the  
57  
58  
59  
60

1  
2  
3 intranet portal, and all parts of the form must be completed by victims of assault within 72  
4  
5 hours of the event and sent to the Safety and Environment Office. Each administrative record  
6  
7 of a violent episode contains the following information: the sociodemographic data of the  
8  
9 victim (age, gender, years of experience, and profession), workplace in which the violent  
10  
11 episode occurred (psychiatric ward, emergency room or ward - 1 item), the type of activity  
12  
13 performed by the HCW at the moment of aggression (i.e., conversation), the HCW's shift at  
14  
15 the time of aggression, the type of aggressor (the perpetrator could be more than one person:  
16  
17 patient, patient's relative, or visitor – 3 items, yes/no answers), the misconduct (violent  
18  
19 behaviour could be of more than one type: insult, verbal threat, bodily contact, throwing  
20  
21 objects, or use of a weapon – 5 items, yes/no answers), the consequences (consequences could  
22  
23 be of more than one type: interruption of work, medical treatment, psychological support,  
24  
25 hospital care, home care, or no consequence – 5 items, yes/no answers), the possibility of  
26  
27 preventing the attack (1 item, yes/no answer), and the description of the event. Similar to  
28  
29 other investigations (see Magnavita and Heponiemi [10]), age was categorized as <30 years,  
30  
31 30-39 years, 40-49 years, and  $\geq 50$  years, and the years of experience were classified as  $\leq 5$   
32  
33 years, 6-15 years, 16-25 years, and  $> 25$  years (1 item each). The type of activity was  
34  
35 categorized as support activity for patients (e.g., meal preparation and administration),  
36  
37 professional team back-office activity (e.g., treatment prescriptions), and assistance and  
38  
39 patient care (e.g., assistance at the front desk) [41] (1 item). The profession was categorized as  
40  
41 midwife, nurse, medical doctor, administrative staff or technician (such as a radiologist) (1  
42  
43 item). The work shift in which the aggression occurred was categorized as morning (6:00-  
44  
45 12:00), afternoon (12:00-18:00), evening (18:00-24:00) or night (0:00-6:00) (1 item).  
46  
47  
48  
49  
50  
51  
52  
53

### 54 **Procedure**

55  
56 Data were analysed by the authors of this paper and by assistants trained by researchers. After  
57  
58 the approval of the Local Ethics Committee (Comitato di Bioetica dell'Ateneo, University of  
59  
60



1  
2  
3 Torino, Prot. 19468 January 17, 2019) was received, the administrative records of violent  
4  
5 episodes were consulted in January-February 2019. Records were transcribed in a database;  
6  
7 sensitive data (name, surname and worker's registration number) were omitted. This  
8  
9 procedure was in accordance with the code of ethics of the Italian Association of Professional  
10  
11 Psychologists and with Italian law concerning privacy. The files that constituted the corpus of  
12  
13 administrative records were saved in a folder. Overall, the sample contained 418 records. The  
14  
15 inclusion criteria for the episodes in this analysis were the record describing the case of  
16  
17 violence perpetrated by a patient, a relative or a visitor. Thus, 14 records were excluded  
18  
19 because the perpetrator was a colleague, a subordinate or a supervisor. Moreover, eight  
20  
21 records were excluded because the gender of the victim was omitted. Therefore, 396 records  
22  
23 were included in the present work.  
24  
25  
26  
27

### 28 **Data analysis**

29  
30 Descriptive statistics were calculated using IBM SPSS Statistics, version 24. Descriptive  
31  
32 measures (mean  $\pm$  SD) were calculated for all the continuous variables. Because of the  
33  
34 categorical nature of the data,  $\chi^2$  tests were used to examine gender differences, followed by  
35  
36 effect-size calculations (Phi and Cramer's V) to estimate the practical significance of the  
37  
38 differences. As a post hoc test, standardized Pearson residuals (from this point forward: SPRs)  
39  
40 were calculated for each cell to determine which cell differences contributed to the  $\chi^2$  test  
41  
42 results. SPRs with absolute values greater than 1.96 indicated that the number of cases in that  
43  
44 cell was significantly larger than would be expected (in terms of over- or underrepresentation)  
45  
46 if the null hypothesis were true, with a significance level of .05 [42].  
47  
48  
49

50  
51 As suggested by Matteucci and Tomasetto [43], content analysis was used to process  
52  
53 the written description of the violent episodes. Content analysis is defined as "the systematic  
54  
55 assignment of communication content to categories according to rules and the analysis of  
56  
57 relationships involving those categories using statistical methods" [44, p. 3]. These data were  
58  
59  
60

1  
2  
3 analysed using *Alceste 6.0* [45]. This software permits the analysis of written data according  
4  
5 to a descending hierarchical classification (DHC) in which the text is divided into elementary  
6  
7 context units and categorized into homogeneous classes. The software allows for the isolation  
8  
9 and separation of internally homogeneous groups (or classes) within specific populations.  
10  
11 Classes are formed on the basis of the co-occurrence of forms and units of context [43]. The  
12  
13 software uses symbols to indicate the type of root. If the word is followed by the symbol <,  
14  
15 this indicates that only the root of the word is recognized (e.g., aggressi< denotes the words  
16  
17 aggressive, aggression, and aggressively). The symbol + indicates the identification of the  
18  
19 termination and of different forms with the same root (e.g., nurse+ indicates the words nurse  
20  
21 and nurses). The first class that is formed will be the most homogeneous in terms of content,  
22  
23 i.e., the one whose lexical universe (a specific vocabulary that is used and to which the  
24  
25 speaker attributes relevant meaning) appears to differ from those of others. The software  
26  
27 performs the  $\chi^2$  test on the association between words and classes to identify the specific  
28  
29 vocabulary for each class. This step allows the researcher to identify the lexical worlds in the  
30  
31 text, i.e., the “usual places” (conventional themes) of discourse [46]. The software allows for  
32  
33 repeated segments to be highlighted, i.e., associations of the most frequent words in a class  
34  
35 and related classes with the selected variables. These are called illustrative variables and carry  
36  
37 further information about the textual corpus, allowing the researcher to identify the specific  
38  
39 characteristics that define individuals who share the same semantic universe.  
40  
41  
42  
43  
44  
45

46  
47 In this study, the findings from the descriptive analysis were used as illustrative  
48  
49 variables for the text analysis. An example of an illustrative variable is \*midwife, which  
50  
51 indicates the profession of the HCW who draws up the administrative record to report the  
52  
53 violence experienced in the workplace. The resulting data were examined by three  
54  
55 independent and autonomous subjects, as suggested by Annese and Mininni [47]. This phase  
56  
57 was followed by a discussion of the meaning attributed to the data to reach an agreement on  
58  
59  
60

1  
2  
3 the results. Consistency was guaranteed by reproducibility (or intercoder reliability -[48];  
4  
5 Cohen's  $k = .85$ ).  
6  
7

## 8 **Patient and public involvement**

9  
10 Patients were not involved in the planning and conception of this study.  
11  
12

## 13 **RESULTS**

### 14 **Descriptive analysis**

15  
16 Overall, the records were compiled by 396 HCWs (3.6% of all HCWs working in the  
17  
18 hospital). A total of 302 HCWs (76.3%) were female, representing approximately 4% of the  
19  
20 entire female HCW population; 94 (23.7%) were male, representing 3.1% of the entire male  
21  
22 HCW population. Most of the HCWs were aged 40-49 years (146, 36.9%; 4.7% of the entire  
23  
24 HCW population aged 40-49 years). Regarding years of experience, most HCWs were in the  
25  
26 range of 6-15 years (181, 46.3%; 6.1% of the entire HCW population with 6-15 years of  
27  
28 experience). Two hundred ninety-eight HCWs (76.2%) were nurses (26.6% of the entire nurse  
29  
30 population), 53 (13.6%) were midwives (25.4% of the entire midwife population), 22 (5.6%)  
31  
32 were medical doctors (1.2% of the entire medical doctor population), 15 (3.8%) were  
33  
34 administrative staff (1.7% of the entire administrative staff population) and 3 (0.8%) were  
35  
36 technicians (0.5% of the entire technician population). Table 1 presents the sociodemographic  
37  
38 characteristics of the female and male HCWs who experienced violence.  
39  
40  
41  
42  
43  
44

45  
46 Regarding the age of the victims, the findings showed a statistically significant  
47  
48 difference between genders (Cramer's  $V = 0.16$ ). In particular, there were no male victims  
49  
50 aged <30 years ( $|SPR| = -2.0$ ). Male HCWs with 6-15 years of experience referred more  
51  
52 frequently to episodes of violence ( $|SPR| = 1.7$ , Cramer's  $V = 0.16$ ) than did female HCWs.  
53  
54 Moreover, male medical doctors referred more frequently to episodes of violence than did  
55  
56 female doctors, and these episodes of violence occurred more frequently for male medical  
57  
58 doctors ( $|SPR| = 2.5$ , Cramer's  $V = 0.18$ ). The perpetrator was a patient's relative for more  
59  
60

female HCWs than male HCWs (52% and 37.2%, respectively,  $p = .012$ ), while the perpetrator was a visitor for more male HCWs than female HCWs (5.3% and 1.3%, respectively,  $p = .023$ ). Regarding consequences, home care was indicated by male HCWs, while female HCWs did not mention it.

Table 1. Sociodemographic characteristics of the female and male HCWs who experienced violence. The percentages (N = 396) are in brackets.

|                                            | Female<br><i>n</i> = 302 | Male<br><i>n</i> = 94 | $\chi^2$ | <i>p</i> |
|--------------------------------------------|--------------------------|-----------------------|----------|----------|
| Age:                                       |                          |                       | 9.45     | .024     |
| - <30 years                                | 17(5.7)                  | -                     |          |          |
| - 30-39 years                              | 83(27.9)                 | 18(19.4)              |          |          |
| - 40-49 years                              | 105(35.4)                | 41(44.1)              |          |          |
| - $\geq 50$ years                          | 92(31)                   | 34(36.6)              |          |          |
| Years of experience:                       |                          |                       | 10.24    | .017     |
| - $\leq 5$                                 | 44(14.8)                 | 6(6.5)                |          |          |
| - 6-15                                     | 128(43)                  | 53(57)                |          |          |
| - 16-25                                    | 80(26.8)                 | 27(29)                |          |          |
| - >25                                      | 46(15.4)                 | 7(7.5)                |          |          |
| Profession:                                |                          |                       | 13.11    | .011     |
| - Midwife                                  | 39(13.1)                 | 14(15.1)              |          |          |
| - Nurse                                    | 236(79.2)                | 62(66.7)              |          |          |
| - Medical doctor                           | 11(3.7)                  | 11(11.8)              |          |          |
| - Administrative staff                     | 9(3)                     | 6(6.5)                |          |          |
| - Technician                               | 3(1)                     | -                     |          |          |
| Workplace:                                 |                          |                       | 4.38     | n.s.     |
| - Psychiatric ward                         | 35(38.5)                 | 84(28.3)              |          |          |
| - Emergency room                           | 104(35)                  | 23(25.3)              |          |          |
| - Ward                                     | 109(36.7)                | 33(36.3)              |          |          |
| Type of activity:                          |                          |                       | 3.61     | n.s.     |
| - Support activity for patient             | 125(45.8)                | 40(48.8)              |          |          |
| - Professional team's back-office activity | 77(28.2)                 | 15(18.3)              |          |          |
| - Assistance and patient care              | 71(26)                   | 27(32.9)              |          |          |
| Work shift:                                |                          |                       | 0.55     | n.s.     |
| - Morning                                  | 85(28.5)                 | 30(32.3)              |          |          |
| - Afternoon                                | 124(41.6)                | 36(38.7)              |          |          |
| - Evening                                  | 64(21.5)                 | 20(21.5)              |          |          |
| - Night                                    | 25(8.4)                  | 7(7.5)                |          |          |
| Perpetrator:                               |                          |                       |          |          |
| - Patient                                  | 173(57.3)                | 56(59.6)              | 0.15     | n.s.     |
| - Patient's relative                       | 157(52)                  | 35(37.2)              | 6.25     | .012     |
| - Visitor                                  | 4(1.3)                   | 5(5.3)                | 5.15     | .023     |
| Misconduct:                                |                          |                       |          |          |
| - Insult                                   | 252(83.4)                | 67(71.3)              | 6.78     | .009     |
| - Threat                                   | 141(46.7)                | 42(44.7)              | 0.12     | n.s.     |
| - Bodily contact                           | 77(25.5)                 | 37(39.4)              | 6.72     | .010     |
| - Throwing objects                         | 42(13.9)                 | 20(21.3)              | 2.95     | n.s.     |
| - Use of a weapon                          | 14(4.6)                  | 5(5.3)                | 0.07     | n.s.     |

| Consequences:                        |                       |          |           |      |      |
|--------------------------------------|-----------------------|----------|-----------|------|------|
| -                                    | Interruption of work  | 61(64.9) | 210(69.8) | 0.79 | n.s. |
| -                                    | Medical treatment     | 29(9.6)  | 14(15.1)  | 2.15 | n.s. |
| -                                    | Psychological support | 16(5.3)  | 6(6.4)    | 0.16 | n.s. |
| -                                    | Hospital care         | 2(0.7)   | 1(1.1)    | 0.15 | n.s. |
| -                                    | Home care             | -        | 2(2.2)    | 6.53 | .011 |
| -                                    | No consequences       | 64(21.3) | 26(28)    | 1.76 | n.s. |
| The attack could have been prevented |                       | 104(40)  | 25(29.4)  | 3.07 | n.s. |

Note. n.s. = not statistically significant.

### Text analysis

Based on findings from the descriptive analysis, age, years of experience and profession were used as illustrative variables. The analysis of the administrative record drawn up by female HCWs showed that the corpus was composed of 14,951 occurrences (frequency of words in absolute values), 2,739 distinct forms (words with frequency > 3; mean frequency = 13 per form) and 1,345 *hapax* (words used only once, occurrences with a frequency = 1). The overall number of elementary context units was 516. The five most frequent words (associated forms) in the corpus were *patient+* (n = 329), *aggressi<* (n = 125), *medic<* (n = 62), *wait<* (n = 61), and *staff* (n = 39). The dendrogram of stable classes (Figure 1) shows the classification procedure used to create the two classes that emerged (amount of variance explained = 96.9%). For each class, the first characterizing five words are presented in order of the  $\chi^2$  results (Table 2), together with the associated illustrative variables.

INSERT FIGURE 1 ABOUT HERE

Table 2. Findings from text corpus of administrative records compiled by female HCW victims of workplace violence.

| Class I - <i>Waiting time</i> |          | Class II - <i>Physical attack</i> |          |
|-------------------------------|----------|-----------------------------------|----------|
| <i>Words</i>                  | $\chi^2$ | <i>Words</i>                      | $\chi^2$ |
|                               |          |                                   |          |

|                                               |    |                                                    |    |
|-----------------------------------------------|----|----------------------------------------------------|----|
| Visit<                                        | 20 | Kick+                                              | 88 |
| Wait<                                         | 17 | Agitat<                                            | 76 |
| Therap+                                       | 13 | Cris+                                              | 69 |
| Work<                                         | 12 | Personal+                                          | 63 |
| Triage                                        | 11 | Object+                                            | 56 |
| Illustrative variables: emergency room, ward. |    | Illustrative variables: psychiatric ward, midwife. |    |

Class I explained 75% of the variance and was labelled *Waiting time*. The most representative words in terms of  $\chi^2$  describe the violent episodes as a consequence of patients and relatives waiting for a visit or therapy or of the assignment of degrees of urgency to wounds or illnesses to decide the order in which patients will be treated. This waiting time was considered by the perpetrator as unacceptable. The following sentence is an example of how a female HCW described a violent episode.

*“The patient’s relatives were complaining about the waiting time. They could tell that the staff were overworked. The patient’s son and daughter repeatedly came into the emergency room instead of waiting in the hall. The patient’s son said to not annoy him because otherwise there would be trouble”* (nurse, aged 30-39 years, 6-15 years of work)

Class II explained 25% of the variance and was labelled *Physical attack*. This lexical world refers to the behaviours demonstrated by psychiatric patients during routine activities, such as the distribution of meals. Perpetrators were described as patients who suffered from a psychotic crisis and who physically assaulted an HCW. The sentence below provides an example of a respondent’s textual production.

*“At the end of the dinner, the patient had a crisis; he became aggressive with staff that was around him and kicked me in the face, cutting my upper lip”* (midwife, aged 30-39 years, 6-15 years of experience)

The analysis of the administrative record drawn up by male HCWs showed that the corpus was composed of 3,804 occurrences, 1,271 distinct forms (mean frequency = 9 per form) and 795 *hapax*, i.e., words used only once. The overall number of elementary context units was 144. The five most frequent words (associated forms) in the corpus were *patient+* (n = 103), *aggressi<* (n = 34), *threat+* (n = 29), *person<* (n = 26), and *medic<* (n = 20). The dendrogram of stable classes (Figure 2) shows the classification procedure used to create the five classes that emerged (amount of variance explained = 93.6%). For each class, the first characterizing five words are presented in order of the Chi-squared results (Table 3), together with the associated illustrative variables.

INSERT FIGURE 2 ABOUT HERE

Table 3. Findings from text corpus of administrative records compiled by male HCW victims of workplace violence.

|                         |          | <i>Verbal violence</i>  |          |                         | <i>Corporeal assault</i> |                         |          |                         |          |                         |          |
|-------------------------|----------|-------------------------|----------|-------------------------|--------------------------|-------------------------|----------|-------------------------|----------|-------------------------|----------|
|                         |          | Class I                 |          | Class II                |                          | Class III               |          | Class IV                |          | Class V                 |          |
| <i>Words</i>            | $\chi^2$ | <i>Words</i>            | $\chi^2$ | <i>Words</i>            | $\chi^2$                 | <i>Words</i>            | $\chi^2$ | <i>Words</i>            | $\chi^2$ | <i>Words</i>            | $\chi^2$ |
| Wait<                   | 47       | Insult<                 | 48       | Colleague+              | 12                       | Launch<                 | 57       | Follow<                 | 24       |                         |          |
| Ask<                    | 30       | Staff                   | 11       | Ward                    | 11                       | Object+                 | 45       | Therap+                 | 20       |                         |          |
| Visit                   | 25       | Motiv<                  | 10       | Verbal<                 | 11                       | Kick+                   | 22       | Nois+                   | 19       |                         |          |
| Time                    | 24       | Recei<                  | 9        | Patient+                | 11                       | Hit<                    | 16       | Attempt<                | 15       |                         |          |
| Behaviour+              | 24       | Phon+                   | 9        | Relative+               | 9                        | Person<                 | 16       | Violen<                 | 15       |                         |          |
| Illustrative variables: |          | Illustrative variables: |          | Illustrative variables: |                          | Illustrative variables: |          | Illustrative variables: |          | Illustrative variables: |          |
| emergency room,         |          |                         |          | ward, medical           |                          | psychiatric ward,       |          | psychiatric ward,       |          |                         |          |
| nurse                   |          |                         |          | doctor, midwife         |                          | administrative staff    |          | nurse                   |          |                         |          |

|  |                                                                |  |  |  |
|--|----------------------------------------------------------------|--|--|--|
|  | emergency room,<br>professional team's<br>back-office activity |  |  |  |
|--|----------------------------------------------------------------|--|--|--|

The dendrogram (Figure 2) shows the classification procedure used to create the five classes that emerged and highlights which classes are closer and therefore more similar. Specifically, the dendrogram shows that Classes I, II and III are more similar than Classes IV and V. At the same time, Classes IV and V are more similar than the other classes. Classes I, II and III explain – together – 65% of the variance; Classes IV and V explain 35% of the variance.

Classes I, II and III were labelled *Verbal violence*. The words characterizing these classes were related to violent behaviours – such as insults and threats – that HCWs experienced principally in the emergency room and ward, both through direct contact (face to face) and by phone. In these episodes, one or more colleagues were involved. Below are some examples from the descriptions of violent events made by male HCWs:

*“Before the conclusion of the visit, the father started to attack me verbally. He told me ‘I pay the taxes, I ask you to do everything, I do not go out until the child has a diagnosis’. After reiterating that it is not possible to perform this exam in an emergency room, the father threatened me and the nurse verbally, repeatedly”* (medical doctor, aged 40-49 years, 6-15 years of experience)

*“I phoned the patient’s son to inform him of the imminent discharge of his father. I was insulted with elevated tone repeatedly. It was impossible to manage communication; I did not reply in any way to the insults”* (nurse, 6-15 years of experience)

*“The patient’s husband accused me and my colleague of not respecting the numbering in the call for assistance. The colleague explained to him that there is a work plan, but he verbally attacked us”* (nurse, aged  $\geq 50$  years, 16-25 years of experience)



1  
2  
3 Classes IV and V were labelled *Corporeal assault*. The words characterizing these  
4  
5 classes were related to physical violent behaviours – such as hitting and throwing objects –  
6  
7 which HCWs experienced principally in the psychiatric ward. Below are some examples of  
8  
9 sentences from administrative records:  
10

11  
12 *“While my colleague and I were preparing a medication, we were interrupted by the noise of*  
13  
14 *shots coming from the kitchen door. Then, we were reached for and assaulted by the patient”*

15  
16 (nurse, aged >50 years, 6-15 years of experience)

17  
18 *“An agitated patient – for no apparent reason – pushed a cart against the entrance door to*  
19  
20 *break through. He was shunted out, and then he came back and threatened to break our arms”*

21  
22 (administrative staff, aged 40-49 years, 16-25 years of experience)  
23  
24  
25

## 26 **DISCUSSION**

27  
28 The findings from the descriptive analysis showed some differences based on the HCW’s  
29  
30 gender. Male HCWs aged < 30 years did not report violent episodes that occurred in the  
31  
32 workplace, while male HCWs with 6-15 years of experience reported more violent episodes  
33  
34 than their female counterparts did. Among the HCW professions, nursing was the profession  
35  
36 in which HCWs were more prone to experience a violent episode, confirming the results  
37  
38 of [11]. Nevertheless, the findings showed that male medical doctors were more prone to  
39  
40 report violent episodes than female medical doctors. Confirming the findings of Magnavita  
41  
42 and Heponiemi [10], in this study, female HCWs experienced more verbal violence (insults)  
43  
44 than male HCWs did, while male HCWs experienced more physical violence (bodily contact)  
45  
46 than female HCWs did. Thus, our hypothesis was confirmed. An interesting finding concerns  
47  
48 the perpetrator: female HCWs experienced a violent episode acted out by a patient’s relative  
49  
50 more often than male HCWs did, and male HCWs experienced a violent episode acted out by  
51  
52 a visitor more often than female HCWs did. Regarding the workplace, type of activity, and  
53  
54 work shift, no statistically significant difference between genders emerged. This finding did  
55  
56  
57  
58  
59  
60

1  
2  
3 not confirm the results of Magnavita and Heponiemi [10], as in this study, it was not found  
4  
5 that male HCWs experienced workplace violence in wards more often than female HCWs did.  
6  
7

8 Text analyses showed that female and male HCWs reported violent episodes in  
9  
10 different ways. The findings from the text analysis of female HCWs identified a contextual  
11  
12 factor for the violent episodes that occurred principally in those who were working in  
13  
14 emergency rooms and wards. This contextual factor is the waiting time, a condition in which  
15  
16 a patient and a patient's relative – as suggested by Schablon and colleagues [14] – could  
17  
18 experience anxiety, confusion, and fear. Moreover, female HCWs (in particular, midwives)  
19  
20 describe the violent episodes that occurred in the psychiatric ward as a consequence of a  
21  
22 mental health disorder and noted that the assault was unpredictable. Thus, it seems that female  
23  
24 HCWs perceive dealing with violence as part of their role [49]. Male HCWs use different  
25  
26 words to describe violent episodes. They, more often than female HCWs, described the  
27  
28 episodes including the witness of the episode, namely, colleagues. Male HCWs described  
29  
30 episodes that occurred in the emergency room and ward (verbal violence) and in the  
31  
32 psychiatric ward (corporeal assault) in the same way that female HCWs did. These episodes  
33  
34 were related more to the type of profession than to the gender of the HCWs. The other  
35  
36 illustrative variables (age and years of experience) did not have an effect on the differences  
37  
38 between how male and female HCWs experience violent episodes.  
39  
40  
41  
42  
43

44 This study has strengths and limitations. Regarding strengths, in this study,  
45  
46 administrative records in which HCWs experienced violent episodes were used. Usually, self-  
47  
48 administered questionnaires are utilized to collect data about workplace violence. However,  
49  
50 self-assessment could be affected by recall bias [50]; thus, this method does not solve the  
51  
52 problem of overreporting or underreporting: a long study period could also influence the  
53  
54 victim's memory. The analysis of reports completed within 72 hours of the aggression permits  
55  
56 the retrieval of important information about the episode. Moreover, in this study, a qualitative  
57  
58  
59  
60

1  
2  
3 analysis was used to identify differences between genders in reporting these episodes.

4  
5 According to Griffiths and Schabracq [51], the majority of studies in work and health  
6  
7 psychology and investigations on workplace violence utilize a quantitative approach: this  
8  
9 choice stems from the fact that this method allows large numbers of subjects to complete  
10  
11 standardized questionnaires. Otherwise, a qualitative approach permits the gathering of the  
12  
13 complexity and nuances of individual experiences and reveals the range of ways in which  
14  
15 common features operate in experiences of workplace violence [52]. Indeed, this method was  
16  
17 useful to better understand the lexicon that characterized the victimization experienced by  
18  
19 female and male HCWs.  
20  
21  
22

23  
24 This study also has weaknesses. First, because HCWs decided whether to report violent  
25  
26 episodes, the results cannot be generalized and should be taken with caution. Thus, it was not  
27  
28 possible to overcome the bias in reporting violence, as HCWs may be more likely to report  
29  
30 serious events and exclude less serious ones [53]. Future research should explore, in a more  
31  
32 comprehensive way, this phenomenon within health organizations. For example, interviews  
33  
34 and focus group discussion techniques could be used to better understand the obtained results  
35  
36 and how to promote the reporting of all violent behaviour, not only the most serious events: as  
37  
38 recommended by the Italian Ministry of Health [32], a better comprehension of workplace  
39  
40 violence could be useful to prevent it. Another limitation is in the procedure adopted:  
41  
42 administrative records had different styles of reports, which we tried to make homogeneous  
43  
44 through a classification procedure. This process included a subjective component, which must  
45  
46 be considered in any narrative analysis [54]. The use of a mixed-method technique could  
47  
48 permit the description of the phenomenon by a quantitative and qualitative approach. Future  
49  
50 research could use this technique to expand the scope and improve the analytic power of  
51  
52 studies on workplace violence in the healthcare sector [55].  
53  
54  
55  
56  
57

## 58 **CONCLUSIONS**

59  
60

1  
2  
3 Overall, the findings from this explorative study suggest that there is a gender difference not  
4 only in the characteristics of workplace violence perpetrated by patients, patients' relatives  
5 and visitors but also in the way in which these episodes are described. Consequently, as noted  
6 by Lawoko and colleagues [14] and Chen and colleagues [10], it is important in informative  
7 and preventive courses to consider gender differences in experiencing a violent episode. For  
8 female HCWs, it could be useful to provide clear messages that the acceptance of such  
9 violence is not "part of the job" [27,56], explaining that anger should not be taken as an  
10 acceptable emotion in the healthcare environment and that exposure to verbal violence should  
11 not be accepted as a hazard of the profession [57]. For male HCWs, it could be useful to  
12 reflect on feelings related to the stigma of victimization and to stress that a witness is not  
13 necessary to corroborate a male HCW's version of the event. This finding could be analysed  
14 in greater depth through an investigation that involves witnesses of the violent episodes  
15 describing the episodes from their points of view: a follow-up study could include interviews  
16 with staff on gender differences in the long-term impact of these events.

17 Moreover, these findings could be utilized by health organization management to better  
18 organize the security arrangements in some departments, to manage the overload of the  
19 emergency room and to increase the use of safety devices.

20  
21 In conclusion, the findings could be used by health organization management to  
22 improve individual measures, such as intervention programmes, counselling, and  
23 psychological help, to reflect on victimization experiences and the way in which female and  
24 male HCWs react to and cope with workplace violence.

25  
26  
27  
28  
29  
30  
31  
32  
33  
34  
35  
36  
37  
38  
39  
40  
41  
42  
43  
44  
45  
46  
47  
48  
49  
50  
51  
52  
53  
54 **Acknowledgements.** The authors thank Ms. Daniela Cosentino and Mr. Andrea Caputo (M.S.  
55 in Psychology) for their assistance in the transcription of the administrative records.  
56  
57  
58  
59  
60

1  
2  
3 **Competing interests statement.** We declare that we have no significant competing financial,  
4 professional, or personal interests that might have influenced the performance or presentation  
5 of the work described in this manuscript.  
6  
7

8  
9  
10 **Funding statement.** This research received no specific grant from any funding agency in the  
11 public, commercial or not-for-profit sectors.  
12

13  
14 **Ethical approval.** The Local Ethics Committee (Comitato di Bioetica dell'Ateneo, University  
15 of Torino) approved the research project in January 17, 2019 (Prot. 19468).  
16

17  
18 **Data availability statement.** No additional data available.  
19

20  
21 **Author Contributions.** Conceptualization: D.A.M., C.G.C. and M.G.; methodology:  
22 D.A.M.; investigation: D.A.M., P.P., F.G. and M.G.; data analysis: D.A.M.; writing (original  
23 draft preparation): D.A.M. and C.G.C.; writing (review and editing): D.A.M., C.G.C. and  
24 M.G.  
25  
26  
27  
28  
29  
30

## 31 32 33 **REFERENCES**

- 34  
35 1 WHO. Violence: a public health priority. Geneva: World Health Organization 1995.  
36  
37 2 Cooper CL, Swanson N. Workplace violence in the health sector. State of the art. Geneva:  
38 Organización Internacional de Trabajo, Organización Mundial de la Salud, Consejo  
39 Internacional de Enfermeras Internacional de Servicios Públicos 2002.  
40  
41  
42  
43 3 Phillips JP. Workplace violence against health care workers in the United States. *New*  
44 *England journal of medicine* 2016;374(17):1661-1669. doi:10.1056/NEJMra1501998  
45  
46  
47  
48 4 Sun P, Zhang X, Sun Y, Ma H, Jiao M, Xing K, Kang Z, et al. Workplace violence against  
49 health care workers in North Chinese hospitals: a cross-sectional survey. *Int. J.*  
50 *Environ. Res. Public Health* 2017;14(1):96. doi:10.3390/ijerph14010096  
51  
52  
53  
54  
55 5 Elliott PP. Violence in healthcare. *Nurs Manage* 1997:38-41.  
56  
57  
58  
59  
60

- 1  
2  
3 6 Grottole E, Ciriello S, Gabriele M, Giudice A, Lilli M, Mammi F, Quaranta D, Roccia K,  
4  
5 Spadone F, Magnavita N. Assaults and nuisances in health care environment. *Giornale*  
6  
7 *italiano di medicina del lavoro ed ergonomia* 2007;29(3):653-5.  
8  
9
- 10 7 Iozzino L, Ferrari C, Large M, Nielssen O, De Girolamo G. Prevalence and risk factors of  
11  
12 violence by psychiatric acute inpatients: a systematic review and meta-analysis. *PloS*  
13  
14 *one* 2015;10(6):e0128536. doi:10.1371/journal.pone.0128536  
15  
16
- 17 8 Arnetz JE, Hamblin L, Essenmacher L, Upfal MJ, Ager J, Luborsky M. Understanding  
18  
19 patient-to-worker violence in hospitals: a qualitative analysis of documented incident  
20  
21 reports. *J Adv Nurs* 2015;71(2):338-48. doi:10.1111/jan.12494  
22  
23
- 24 9 Kim SC, Ideker K, Todicheeny-Mannes D. Usefulness of aggressive behaviour risk  
25  
26 assessment tool for prospectively identifying violent patients in medical and surgical  
27  
28 units. *J Adv Nurs* 2012;68(2):349-57. doi: 10.1111/j.1365-2648.2011.05744.x  
29  
30
- 31 10 Magnavita N, Heponiemi T. Violence towards health care workers in a Public Health Care  
32  
33 Facility in Italy: a repeated cross-sectional study. *BMC Health Serv*  
34  
35 *Res* 2012;12(1):108. doi:10.1186/1472-6963-12-108  
36  
37
- 38 11 Renwick L, Lavelle M, James K, Stewart D, Richardson M, Bowers L. The physical and  
39  
40 mental health of acute psychiatric ward staff, and its relationship to experience of  
41  
42 physical violence. *International journal of mental health nursing* 2019;28(1):268-77.  
43  
44 doi: 10.1111/inm.12530  
45  
46
- 47 12 Hahn S, Hantikainen V, Needham I, Kok G, Dassen T, Halfens RJG. Patient and visitor  
48  
49 violence in the general hospital, occurrence, staff interventions and consequences: a  
50  
51 cross-sectional survey. *J Adv Nurs* 2012;68(12):2685-2699.  
52  
53
- 54 13 Ahmad M, Al-Rimawi R, Masadeh A, Atoum M. Workplace violence by patients and their  
55  
56 families against nurses: Literature review. *Int J Nurs Health Sci* 2015;2(4):46-55.  
57  
58  
59  
60

- 1  
2  
3 14 Lawoko, S, Soares, JJ, Nolan P. Violence towards psychiatric staff: A comparison of  
4  
5 gender, job and environmental characteristics in England and Sweden. *Work*  
6  
7 *Stress* 2004;18(1):39-55. doi: 10.1080/02678370410001710337  
8  
9
- 10 15 Schablon A, Wendeler D, Kozak A, Nienhaus A, Steinke S. Prevalence and Consequences  
11  
12 of Aggression and Violence towards Nursing and Care Staff in Germany—A Survey.  
13  
14 *Int J Environ Res Public Health* 2018;15(6):1274. doi:10.3390/ijerph15061274  
15  
16
- 17 16 Maguire BJ, O'Meara P, O'Neill BJ, Brightwell R. Violence against emergency medical  
18  
19 services personnel: A systematic review of the literature. *American journal of*  
20  
21 *industrial medicine* 2018;61(2):167-80. doi: 10.1002/ajim.22797  
22  
23
- 24 17 Italian Ministry of Health. Personale delle A.S.L. e degli istituti di cura  
25  
26 pubblici. [www.salute.gov.it/imgs/C\\_17\\_pubblicazioni\\_2161\\_allegato.pdf](http://www.salute.gov.it/imgs/C_17_pubblicazioni_2161_allegato.pdf)  
27
- 28 18 Morganson, VJ, Brown SE. Gender and Sexualized Aggression in the Workplace. In:  
29  
30 Nadler JY, Lowery MR, eds. *The War on Women in the United States: Beliefs,*  
31  
32 *Tactics, and the Best Defenses.* Praeger Publishing 2018:2051.  
33  
34
- 35 19 Chen C, Smith PM, Mustard C. Gender differences in injuries attributed to workplace  
36  
37 violence in Ontario 2002–2015. *Occup Environ Med* 2019;76(1):3-9.  
38  
39 doi:10.1136/oemed-2018-105152  
40  
41
- 42 20 Itzhaki M, Peles-Bortz A, Kostistky H, Barnoy D, Filshinsky V, Bluvstein I. Exposure of  
43  
44 mental health nurses to violence associated with job stress, life satisfaction, staff  
45  
46 resilience, and post-traumatic growth. *Int J Ment Health Nurs* 2015;24(5):403-412.  
47  
48 doi.org/10.3389/fpsy.2018.00059  
49  
50
- 51 21 Hampton D, Rayens MK. Impact of psychological empowerment on workplace bullying  
52  
53 and intent to leave. *JONA: The Journal of Nursing Administration.* 2019;49(4):179-  
54  
55 85. doi: 10.1097/NNA.0000000000000735  
56  
57  
58  
59  
60



- 1  
2  
3 22 Laeeque SH, Bilal A, Babar S, Khan Z, Ul Rahman S. How patient-perpetrated workplace  
4  
5 violence leads to turnover intention among nurses: The mediating mechanism of  
6  
7 occupational stress and burnout. *Journal of Aggression, Maltreatment & Trauma*  
8  
9 2018;27(1):96-118.doi:10.1080/10926771.2017.1410751  
11
- 12 23 Kim H, Kim JS, Choe K, Kwak Y, Song JS. Mediating effects of workplace violence on  
13  
14 the relationships between emotional labour and burnout among clinical nurses.  
15  
16 *Journal of advanced nursing* 2018;74(10):2331-9.doi: 10.1111/jan.13731  
17  
18
- 19 24 Findorff MJ, McGovern PM, Wall MM, Gerberich SG. Reporting violence to a health care  
20  
21 employer: a cross-sectional study. *AAOHN journal* 2005;53(9):399-406.  
22  
23 doi:10.1177/216507990505300906  
24  
25
- 26 25 Gillespie GL, Leming-Lee TS, Crutcher T, Mattei J. Chart It to Stop It. *J Nur Care Qual*  
27  
28 2016;31(3):254-61. doi:10.1097/NCQ.0000000000000172  
29  
30
- 31 26 Clements PT, DeRanieri JT, Clark K, Manno MS, Kuhn DW. Workplace violence and  
32  
33 corporate policy for health care settings. *Nur Econ* 2005;23(3):119-124.  
34  
35
- 36 27 Kennedy MP. Violence in emergency departments: under-reported, unconstrained, and  
37  
38 unconscionable. *Med J Aust* 2005;183(7):362-365. doi:10.5694/j.1326-  
39  
40 5377.2005.tb07084.x  
41
- 42 28 Chen C, Smith PM, Mustard C. Gender differences in injuries attributed to workplace  
43  
44 violence in Ontario 2002–2015. *Occup Environ Med* 2019;76(1):3-9.  
45  
46 doi:10.1136/oemed-2018-105152  
47  
48
- 49 29 Eurofound. Fifth European Working Conditions Survey. Publication Office of the  
50  
51 European Union. Luxembourg, 2012. Available at  
52  
53 [https://www.eurofound.europa.eu/it/publications/report/2012/working-](https://www.eurofound.europa.eu/it/publications/report/2012/working-conditions/fifth-european-working-conditions-survey-overview-report)  
54  
55 [conditions/fifth-european-working-conditions-survey-overview-report](https://www.eurofound.europa.eu/it/publications/report/2012/working-conditions/fifth-european-working-conditions-survey-overview-report)  
56  
57  
58  
59  
60



- 1  
2  
3 30 Istat. Il disagio nelle relazioni lavorative. Istat 2010. Available at  
4  
5 <https://www.istat.it/it/archivio/5191>  
6  
7  
8 31 Inail. Violenza, aggressione e non solo. Dati Inail 2018. Available at  
9  
10 <https://www.inail.it/cs/internet/docs/alg-dati-inail-2018-novembre.pdf>  
11  
12 32 Ministero della Salute. Raccomandazione per prevenire gli atti di violenza a danno degli  
13  
14 operatori sanitari. Raccomandazione n. 8, novembre 2007.  
15  
16 [http://www.salute.gov.it/portale/documentazione/p6\\_2\\_2\\_1.jsp?id=721](http://www.salute.gov.it/portale/documentazione/p6_2_2_1.jsp?id=721)  
17  
18 33 Hopkins L, Taylor L, Bowen E, Wood C. A qualitative study investigating adolescents'  
19  
20 understanding of aggression, bullying and violence. *Child Youth Serv Rev*  
21  
22 2013;35(4):685-93. doi:10.1016/j.chilyouth.2013.01.012  
23  
24  
25 34 Patton MQ. Qualitative research and evaluation methods. Thousand Oaks, CA: Sage  
26  
27 2002:339-427.  
28  
29  
30 35 Ritchie J, Lewis J, Nicholls CM, Ormston R, eds. Qualitative research practice: A guide  
31  
32 for social science students and researchers. Thousand Oaks, CA: Sage 2013.  
33  
34 36 Fetters MD, Curry LA, Creswell JW. Achieving integration in mixed methods designs—  
35  
36 principles and practices. *Health Serv Res* 2013;48:2134-56. doi:10.1111/1475-  
37  
38 6773.12117  
39  
40  
41 37 Ramacciati N, Ceccagnoli A, Addey B, Rasero L. Violence towards emergency nurses.  
42  
43 The Italian national survey 2016: A qualitative study. *Int J Nurs Stud* 2018;81:21-29.  
44  
45 doi:10.1016/j.ijnurstu.20  
46  
47  
48 38 Shahzad A, Malik RK. Workplace Violence: An Extensive Issue for Nurses in Pakistan—  
49  
50 A Qualitative Investigation. *J Interpers Violence* 2014;29,11:2021-2034.  
51  
52 doi:10.1177/088626051351600518.01.017  
53  
54  
55 39 Pattani R, Ginsburg S, Johnson AM, Moore JE, Jassemi S, Straus SE. Organizational  
56  
57 factors contributing to incivility at an academic medical center and systems-based  
58  
59  
60

- 1  
2  
3 solutions: a qualitative study. *Academic Medicine* 2018;93(10):1569.doi:  
4  
5 10.1097/ACM.0000000000002310  
6  
7  
8 40 Arnetz J, Hamblin LE, Sudan S, Arnetz B. Organizational determinants of workplace  
9  
10 violence against hospital workers. *Journal of occupational and environmental*  
11  
12 *medicine* 2018;60(8):693.doi: 10.1097/JOM.0000000000001345  
13  
14  
15 41 Tucker AL, Spear SJ. Operational failures and interruptions in hospital nursing. *Health*  
16  
17 *Serv Res* 2006; 41(3p1):643-662. doi:10.1111/j.1475-6773.2006.00502.x  
18  
19  
20 42 Agresti A. *Categorical Data Analysis* (3<sup>rd</sup> ed.). Hoboken, New Jersey: John Wiley & Sons  
21  
22 Inc. 2002:267-313.  
23  
24 43 Matteucci MC, Tomasetto C. Alceste: un software per l'analisi dei dati testuali. In: Mazzara  
25  
26 BM, ed. *Metodi qualitativi in psicologia sociale*. Roma: Carocci 2002:305-27.  
27  
28  
29 44 Riff D, Lacy S, Fico F. *Analyzing media messages: Using quantitative content analysis in*  
30  
31 *research*. New York: Routledge. 2014. doi:10.4324/9780203551691  
32  
33  
34 45 Reinert M. Un logiciel d'analyse lexicale. *Cahiers de l'analyse des données* 1986;11(4):471-  
35  
36 81.  
37  
38 46 Reinert, M. Mondes lexicaux et topoi dans l'approche de Alceste. [Lexical worlds and topoi  
39  
40 in Alceste approach] In: S. Mellet & M. Vuillome, eds. *Mots chiffrés et déchiffrés*  
41  
42 [Coded and decoded words]. Paris, France: Honoré Champion Editeur 1998:289-303.  
43  
44  
45 47 Annese S, Mininni G. La focus group discussion tra analisi del contenuto e analisi del  
46  
47 discorso. In Mazzara BM, ed. *Metodi qualitativi in psicologia sociale*. Roma: Carocci  
48  
49 2002:125-48.  
50  
51  
52 48 Burla L, Knierim B, Barth J, Liewald K, Duetz M, Abel T. From text to codings: intercoder  
53  
54 reliability assessment in qualitative content analysis. *Nurs Res* 2008;57(2):113-7. doi:  
55  
56  
57 49 Brockmann, M. New perspectives on violence in social care. *Journal of Social*  
58  
59 *Work* 2002;2(1):29-44. doi:10.1177/146801730200200103  
60

- 1  
2  
3 50 Brophy, J. T., Keith, M. M., & Hurley, M. (2018). Assaulted and unheard: violence against  
4  
5 healthcare staff. *New solutions: a journal of environmental and occupational health*  
6  
7 *policy*, 27(4), 581-606.  
8  
9
- 10 51 Griffiths A, Schabracq MJ. Work and health psychology as a scientific discipline: Facing  
11  
12 the limits of the natural science paradigm. In: Schabracq MJ, Winnubst JAM, Cooper  
13  
14 CL, eds. *The handbook of work and health psychology*. New York: Wiley 2003:173-  
15  
16 189.  
17  
18
- 19 52 Coyle A. Introduction to qualitative psychological research. In: Lyons E, Coyle A, eds.  
20  
21 *Analysing qualitative data in psychology*. Thousand Oaks, CA: Sage Publications  
22  
23 2007:9-29. doi:10.4135/9781446207536.d7  
24  
25
- 26 53 Findorff MJ, McGovern PM, Wall MM, Gerberich SG. Reporting violence to a health care  
27  
28 employer: a cross-sectional study. *AAOHN Journal* 2005;53(9):399-406.  
29  
30
- 31 54 Amaratunga D, Baldry D, Sarshar M, Newton R. Quantitative and qualitative research in  
32  
33 the built environment: application of “mixed” research approach. *Work*  
34  
35 *study* 2002;51(1):17-31. doi:10.1108/00438020210415488  
36  
37
- 38 55 Sandelowski M. Combining qualitative and quantitative sampling, data collection, and  
39  
40 analysis techniques in mixed-method studies. *Res Nurs & Health* 2000;23(3):246-255.  
41  
42 doi:10.1002/1098240X(200006)23:3<246::AID-NUR9>3.0.CO;2-H  
43  
44
- 45 56 Potera C. Violence against nurses in the workplace. *Am J Nurs* 2016;116(6):20-21.  
46  
47 doi:10.1097/01.NAJ.0000484226.30177.ab  
48
- 49 57 Duxbury, J., & Whittington, R. (2005). Causes and management of patient aggression and  
50  
51 violence: staff and patient perspectives. *Journal of advanced nursing*, 50(5), 469-478.  
52  
53  
54  
55  
56  
57  
58  
59  
60

1  
2  
3 Figure legends:  
4  
5

6 Figure 1. *Text corpus of administrative records compiled by female HCWs victims of*  
7 *workplace violence. The dendogram shows the classification procedure used to create the two*  
8 *classes that emerged (amount of variance explained = 96.9%). Class I explained 75% of the*  
9 *variance and was labelled Waiting time. Class II explained 25% of the variance and was*  
10 *labelled Physical attack.*  
11  
12  
13  
14  
15  
16

17  
18 Figure 2. *Text corpus of administrative records compiled by male HCWs victims of*  
19 *workplace violence. The Dendogram shows the classification procedure used to create the*  
20 *five classes that emerged (amount of variance explained = 93.6%). The dendrogram shows*  
21 *that Classes I, II and III are more similar than Classes IV and V. At the same time, Classes IV*  
22 *and V are more similar than the other classes. Classes I, II and III explain – together – 65%*  
23 *of the variance; Classes IV and V explain 35% of the variance. Classes I, II and III were*  
24 *labelled Verbal violence. Classes IV and V were labelled Corporeal assault.*  
25  
26  
27  
28  
29  
30  
31  
32  
33  
34  
35  
36  
37  
38  
39  
40  
41  
42  
43  
44  
45  
46  
47  
48  
49  
50  
51  
52  
53  
54  
55  
56  
57  
58  
59  
60

1  
2  
3 Figure 1. *Text corpus of administrative records compiled by female HCWs victims of*  
4 *workplace violence. The dendrogram shows the classification procedure used to create the two classes*  
5 *that emerged (amount of variance explained = 96.9%). Class I explained 75% of the variance and*  
6 *was labelled* *Waiting time*. *Class II explained 25% of the variance and was labelled* *Physical attack*.  
7  
8  
9  
10  
11  
12



1  
 2 Figure 2. Text corpus of administrative records compiled by male HCWs victims of workplace violence. The Dendrogram shows the  
 3 classification procedure used to create the five classes that emerged (amount of variance explained = 93.6%). The dendrogram shows that Classes  
 4 I, II and III are more similar than Classes IV and V. At the same time, Classes IV and V are more similar than the other classes. Classes I, II and III  
 5 explain – together – 65% of the variance; Classes IV and V explain 35% of the variance. Classes I, II and III were labelled Verbal violence. Classes  
 6 IV and V were labelled Corporeal assault.  
 7  
 8  
 9  
 10  
 11  
 12  
 13  
 14  
 15  
 16  
 17  
 18  
 19  
 20  
 21  
 22  
 23  
 24  
 25  
 26  
 27  
 28  
 29  
 30  
 31  
 32  
 33  
 34  
 35  
 36  
 37  
 38  
 39  
 40  
 41  
 42  
 43  
 44  
 45  
 46



# Standards for Reporting Qualitative Research (SRQR)\*

<http://www.equator-network.org/reporting-guidelines/srqr/>

Page/line no(s).

## Title and abstract

|                                                                                                                                                                                                                                                              |        |
|--------------------------------------------------------------------------------------------------------------------------------------------------------------------------------------------------------------------------------------------------------------|--------|
| <p><b>Title</b> - Concise description of the nature and topic of the study Identifying the study as qualitative or indicating the approach (e.g., ethnography, grounded theory) or data collection methods (e.g., interview, focus group) is recommended</p> | Page 1 |
| <p><b>Abstract</b> - Summary of key elements of the study using the abstract format of the intended publication; typically includes background, purpose, methods, results, and conclusions</p>                                                               | Page 1 |

## Introduction

|                                                                                                                                                                     |           |
|---------------------------------------------------------------------------------------------------------------------------------------------------------------------|-----------|
| <p><b>Problem formulation</b> - Description and significance of the problem/phenomenon studied; review of relevant theory and empirical work; problem statement</p> | Pages 2-5 |
| <p><b>Purpose or research question</b> - Purpose of the study and specific objectives or questions</p>                                                              | Page 6    |

## Methods

|                                                                                                                                                                                                                                                                                                                                                                                                             |           |
|-------------------------------------------------------------------------------------------------------------------------------------------------------------------------------------------------------------------------------------------------------------------------------------------------------------------------------------------------------------------------------------------------------------|-----------|
| <p><b>Qualitative approach and research paradigm</b> - Qualitative approach (e.g., ethnography, grounded theory, case study, phenomenology, narrative research) and guiding theory if appropriate; identifying the research paradigm (e.g., postpositivist, constructivist/ interpretivist) is also recommended; rationale**</p>                                                                            | Pages 6-8 |
| <p><b>Researcher characteristics and reflexivity</b> - Researchers' characteristics that may influence the research, including personal attributes, qualifications/experience, relationship with participants, assumptions, and/or presuppositions; potential or actual interaction between researchers' characteristics and the research questions, approach, methods, results, and/or transferability</p> | n.a.      |
| <p><b>Context</b> - Setting/site and salient contextual factors; rationale**</p>                                                                                                                                                                                                                                                                                                                            | Page 8    |
| <p><b>Sampling strategy</b> - How and why research participants, documents, or events were selected; criteria for deciding when no further sampling was necessary (e.g., sampling saturation); rationale**</p>                                                                                                                                                                                              | Page 8    |
| <p><b>Ethical issues pertaining to human subjects</b> - Documentation of approval by an appropriate ethics review board and participant consent, or explanation for lack thereof; other confidentiality and data security issues</p>                                                                                                                                                                        | Page 8    |
| <p><b>Data collection methods</b> - Types of data collected; details of data collection procedures including (as appropriate) start and stop dates of data collection and analysis, iterative process, triangulation of sources/methods, and modification of procedures in response to evolving study findings; rationale**</p>                                                                             | Page 8    |

|                       |                                                                                                                                                                                                                                                       |            |
|-----------------------|-------------------------------------------------------------------------------------------------------------------------------------------------------------------------------------------------------------------------------------------------------|------------|
| 1<br>2<br>3<br>4<br>5 | <b>Data collection instruments and technologies</b> - Description of instruments (e.g., interview guides, questionnaires) and devices (e.g., audio recorders) used for data collection; if/how the instrument(s) changed over the course of the study | Page 7     |
| 6<br>7<br>8           | <b>Units of study</b> - Number and relevant characteristics of participants, documents, or events included in the study; level of participation (could be reported in results)                                                                        | Pages 6-7  |
| 9<br>10<br>11<br>12   | <b>Data processing</b> - Methods for processing data prior to and during analysis, including transcription, data entry, data management and security, verification of data integrity, data coding, and anonymization/de-identification of excerpts    | Pages 8-10 |
| 13<br>14<br>15<br>16  | <b>Data analysis</b> - Process by which inferences, themes, etc., were identified and developed, including the researchers involved in data analysis; usually references a specific paradigm or approach; rationale**                                 | Pages 8-10 |
| 17<br>18<br>19<br>20  | <b>Techniques to enhance trustworthiness</b> - Techniques to enhance trustworthiness and credibility of data analysis (e.g., member checking, audit trail, triangulation); rationale**                                                                | Page 10    |

## Results/findings

|                      |                                                                                                                                                                                                   |             |
|----------------------|---------------------------------------------------------------------------------------------------------------------------------------------------------------------------------------------------|-------------|
| 23<br>24<br>25<br>26 | <b>Synthesis and interpretation</b> - Main findings (e.g., interpretations, inferences, and themes); might include development of a theory or model, or integration with prior research or theory | Pages 10-16 |
| 27<br>28<br>29       | <b>Links to empirical data</b> - Evidence (e.g., quotes, field notes, text excerpts, photographs) to substantiate analytic findings                                                               | Pages 13-16 |

## Discussion

|                                  |                                                                                                                                                                                                                                                                                                                                                                                                             |             |
|----------------------------------|-------------------------------------------------------------------------------------------------------------------------------------------------------------------------------------------------------------------------------------------------------------------------------------------------------------------------------------------------------------------------------------------------------------|-------------|
| 32<br>33<br>34<br>35<br>36<br>37 | <b>Integration with prior work, implications, transferability, and contribution(s) to the field</b> - Short summary of main findings; explanation of how findings and conclusions connect to, support, elaborate on, or challenge conclusions of earlier scholarship; discussion of scope of application/generalizability; identification of unique contribution(s) to scholarship in a discipline or field | Pages 17-18 |
| 38<br>39                         | <b>Limitations</b> - Trustworthiness and limitations of findings                                                                                                                                                                                                                                                                                                                                            | Pages 18-19 |

## Other

|                |                                                                                                                                               |         |
|----------------|-----------------------------------------------------------------------------------------------------------------------------------------------|---------|
| 42<br>43<br>44 | <b>Conflicts of interest</b> - Potential sources of influence or perceived influence on study conduct and conclusions; how these were managed | Page 20 |
| 45<br>46       | <b>Funding</b> - Sources of funding and other support; role of funders in data collection, interpretation, and reporting                      | Page 20 |

\*The authors created the SRQR by searching the literature to identify guidelines, reporting standards, and critical appraisal criteria for qualitative research; reviewing the reference lists of retrieved sources; and contacting experts to gain feedback. The SRQR aims to improve the transparency of all aspects of qualitative research by providing clear standards for reporting qualitative research.



1  
2  
3  
4  
5  
6  
7  
8  
9  
10  
11  
12  
13  
14  
15  
16  
17  
18  
19  
20  
21  
22  
23  
24  
25  
26  
27  
28  
29  
30  
31  
32  
33  
34  
35  
36  
37  
38  
39  
40  
41  
42  
43  
44  
45  
46  
47  
48  
49  
50  
51  
52  
53  
54  
55  
56  
57  
58  
59  
60

\*\*The rationale should briefly discuss the justification for choosing that theory, approach, method, or technique rather than other options available, the assumptions and limitations implicit in those choices, and how those choices influence study conclusions and transferability. As appropriate, the rationale for several items might be discussed together.

**Reference:**

O'Brien BC, Harris IB, Beckman TJ, Reed DA, Cook DA. **Standards for reporting qualitative research: a synthesis of recommendations.** *Academic Medicine*, Vol. 89, No. 9 / Sept 2014  
DOI: 10.1097/ACM.0000000000000388

For peer review only
